# Supplementary material for: Histone H1 prevents non-CG methylation-mediated small RNA biogenesis in Arabidopsis heterochromatin
Source: eLife. 2021 Dec 1;10:e72676. doi: 10.7554/eLife.72676 (PMC8828055; doi:10.7554/eLife.72676)
Supplement: Figure 1—source data 1. [file elife-72676-fig1-data1.xlsx]

## Sheet: CMT_TEs
TE_ID	chromosome	start	end	direction
AT1G07025	Chr1	2157658	2158158	-
AT1TE10875	Chr1	3343468	3343773	-
AT1TE10935	Chr1	3360625	3361316	-
AT1TE12295	Chr1	3780764	3785721	+
AT1G11590	Chr1	3892580	3894677	+
TEM0121	Chr1	4620442	4621627	+
AT1TE15170	Chr1	4683025	4685396	+
AT1TE15175	Chr1	4683974	4684349	+
AT1G14110	Chr1	4830297	4831915	+
AT1TE19430	Chr1	6009291	6014092	-
AT1TE20085	Chr1	6211026	6211309	+
AT1G19260	Chr1	6657260	6659569	-
AT1TE22850	Chr1	7066492	7071562	+
AT1G20400	Chr1	7072192	7076619	-
AT1G21230	Chr1	7429895	7432477	+
AT1G21925	Chr1	7710423	7710725	-
TEM0228	Chr1	7745332	7748304	+
AT1TE25645	Chr1	7969360	7974385	+
AT1TE26260	Chr1	8160055	8160565	+
AT1G23720	Chr1	8388297	8391623	+
TEM0270	Chr1	8408858	8409461	+
AT1G23915	Chr1	8457659	8458946	+
TEM0283	Chr1	8590789	8591692	+
AT1G24388	Chr1	8648099	8648694	-
AT1TE28175	Chr1	8729255	8733277	+
AT1TE28320	Chr1	8778395	8778654	+
AT1TE28325	Chr1	8778655	8778970	+
AT1G24909	Chr1	8785785	8787914	-
AT1TE28375	Chr1	8791595	8792382	+
AT1G25025	Chr1	8800808	8801584	+
AT1TE28395	Chr1	8800897	8801182	+
AT1TE28400	Chr1	8801183	8801459	+
AT1TE28455	Chr1	8815561	8815837	+
AT1G25155	Chr1	8822692	8824821	-
AT1G25180	Chr1	8829564	8831390	+
AT1TE28500	Chr1	8829653	8829938	+
AT1TE28505	Chr1	8829939	8830254	+
AT1TE28830	Chr1	8927731	8933058	-
AT1TE30195	Chr1	9368344	9373307	-
AT1TE30845	Chr1	9574361	9575371	-
AT1G27565	Chr1	9574550	9575189	+
AT1G27570	Chr1	9575538	9582376	+
AT1TE30870	Chr1	9582536	9582966	-
AT1TE33490	Chr1	10357356	10363358	+
AT1TE34465	Chr1	10660289	10660600	-
AT1G30974	Chr1	11046969	11047325	+
AT1TE35675	Chr1	11048185	11048555	-
AT1TE35720	Chr1	11064455	11067139	-
AT1TE35855	Chr1	11096889	11099331	-
AT1TE35860	Chr1	11099331	11100277	-
AT1TE36035	Chr1	11148307	11152649	-
AT1TE36570	Chr1	11302245	11310368	-
AT1G31640	Chr1	11322692	11324176	-
AT1TE37210	Chr1	11504086	11505147	+
AT1TE37215	Chr1	11505147	11507634	+
AT1G32000	Chr1	11508285	11508909	-
AT1G32010	Chr1	11509341	11512040	-
AT1TE37265	Chr1	11517916	11521322	-
AT1G33010	Chr1	11959287	11960591	+
AT1TE38925	Chr1	12013702	12014340	+
AT1TE38935	Chr1	12015672	12016037	+
AT1TE39030	Chr1	12041782	12042411	+
AT1TE39375	Chr1	12139299	12139652	+
AT1TE39380	Chr1	12140694	12141659	-
AT1TE39390	Chr1	12142353	12142692	+
TEM0573	Chr1	12222077	12223319	+
AT1TE39805	Chr1	12252751	12253031	-
AT1TE39880	Chr1	12273259	12276388	-
AT1TE39950	Chr1	12291257	12292501	+
AT1G33910	Chr1	12314904	12316258	+
AT1G34042	Chr1	12379427	12379703	-
AT1G34070	Chr1	12402283	12403209	+
AT1TE40340	Chr1	12403229	12404876	-
AT1TE40345	Chr1	12405286	12405918	-
AT1TE40355	Chr1	12406708	12410000	+
AT1TE40565	Chr1	12467042	12467291	-
AT1G34310	Chr1	12508548	12511520	-
AT1G34400	Chr1	12565992	12566615	-
AT1TE40940	Chr1	12566242	12568303	+
AT1TE40955	Chr1	12569583	12572711	-
AT1TE41045	Chr1	12593886	12594542	+
AT1TE41230	Chr1	12626456	12630547	+
AT1TE41345	Chr1	12664496	12673969	-
AT1TE41350	Chr1	12674459	12684931	-
AT1TE41460	Chr1	12713487	12728545	+
AT1TE41465	Chr1	12728937	12729681	+
AT1TE41485	Chr1	12731811	12732371	-
AT1TE41575	Chr1	12753511	12755059	+
AT1TE41580	Chr1	12755059	12760395	+
AT1TE41625	Chr1	12768946	12780004	-
AT1G34807	Chr1	12777711	12778231	+
AT1G34812	Chr1	12781126	12781766	+
AT1G34817	Chr1	12784536	12785176	+
AT1G34822	Chr1	12787950	12788590	+
AT1G34827	Chr1	12791364	12791884	+
AT1G34910	Chr1	12804834	12805334	+
AT1G35035	Chr1	12811030	12811308	-
AT1G35040	Chr1	12812157	12812569	+
AT1TE41735	Chr1	12813937	12816180	+
AT1TE41750	Chr1	12826807	12827497	+
AT1TE41765	Chr1	12830336	12832135	-
AT1TE41860	Chr1	12856201	12862061	-
AT1G35150	Chr1	12864158	12866238	-
AT1G35242	Chr1	12930980	12931555	+
AT1TE42210	Chr1	12942824	12947010	+
AT1TE42225	Chr1	12949834	12953875	+
AT1TE42395	Chr1	13000217	13005219	+
AT1G35375	Chr1	13005673	13006187	-
AT1TE42400	Chr1	13006365	13007984	-
AT1TE42410	Chr1	13010029	13011057	+
AT1TE42415	Chr1	13011057	13012650	+
AT1G35400	Chr1	13018289	13019198	+
AT1TE42445	Chr1	13019464	13021045	-
AT1TE42465	Chr1	13021228	13022484	-
AT1TE42490	Chr1	13028439	13028711	+
AT1TE42570	Chr1	13043646	13043910	-
AT1TE42620	Chr1	13055567	13056271	-
AT1TE42800	Chr1	13098280	13102834	+
AT1TE42820	Chr1	13107033	13107599	-
AT1TE42875	Chr1	13127112	13128014	-
AT1TE42890	Chr1	13131404	13140006	+
AT1G35614	Chr1	13148592	13149559	+
AT1TE42920	Chr1	13150516	13151142	+
AT1G35617	Chr1	13153583	13153948	+
AT1TE43020	Chr1	13178815	13179468	-
AT1TE43025	Chr1	13179468	13180611	+
AT1TE43030	Chr1	13180945	13181769	-
AT1TE43040	Chr1	13181964	13186591	-
AT1TE43080	Chr1	13199077	13199696	-
AT1TE43355	Chr1	13263762	13276157	+
AT1TE43375	Chr1	13284487	13284694	+
AT1TE43380	Chr1	13285260	13285891	+
AT1TE43430	Chr1	13295391	13296927	-
AT1TE43440	Chr1	13298355	13299022	+
AT1TE43445	Chr1	13299133	13301583	-
AT1TE43455	Chr1	13301629	13302052	+
AT1TE43460	Chr1	13302505	13303122	+
AT1TE43490	Chr1	13305227	13305432	+
AT1TE43510	Chr1	13311596	13312488	+
AT1TE43585	Chr1	13324757	13329639	+
AT1G35850	Chr1	13330510	13331506	+
AT1G35860	Chr1	13332047	13334050	-
AT1TE43605	Chr1	13336749	13339482	+
AT1TE43610	Chr1	13342235	13342475	-
AT1TE43640	Chr1	13347744	13349384	+
AT1TE43740	Chr1	13371474	13386480	+
AT1TE43780	Chr1	13392125	13393945	-
AT1TE43790	Chr1	13394347	13394649	-
AT1TE43810	Chr1	13400776	13401576	+
AT1TE43820	Chr1	13401675	13402670	+
AT1TE43865	Chr1	13410458	13415145	-
AT1TE43880	Chr1	13417657	13421489	-
AT1TE43910	Chr1	13426457	13430183	+
AT1G36020	Chr1	13433919	13434340	-
AT1G36030	Chr1	13436586	13436828	+
AT1TE43975	Chr1	13439443	13448530	+
AT1G36078	Chr1	13481665	13482785	-
AT1TE44130	Chr1	13490620	13490824	-
AT1G36095	Chr1	13491370	13492725	-
AT1G36100	Chr1	13494652	13495215	+
AT1TE44180	Chr1	13499729	13500849	+
AT1TE44205	Chr1	13504265	13505061	-
AT1TE44215	Chr1	13505093	13506749	-
AT1TE44220	Chr1	13506749	13507194	-
AT1TE44225	Chr1	13507194	13507779	-
AT1TE44235	Chr1	13515964	13517626	-
AT1TE44250	Chr1	13517762	13520558	-
AT1TE44260	Chr1	13524125	13524980	-
AT1TE44380	Chr1	13559845	13564825	+
AT1TE44455	Chr1	13576126	13581525	-
AT1TE44525	Chr1	13593058	13597322	+
AT1TE44530	Chr1	13597433	13597667	+
AT1TE44535	Chr1	13597674	13599711	+
AT1TE44575	Chr1	13606761	13607807	+
AT1G36230	Chr1	13610985	13614051	-
AT1TE44585	Chr1	13612473	13612745	+
AT1TE44590	Chr1	13614381	13614631	-
AT1G36240	Chr1	13614890	13616233	+
AT1TE44600	Chr1	13617361	13617633	+
AT1TE44605	Chr1	13617796	13623173	+
AT1TE44615	Chr1	13621506	13622705	-
AT1TE44630	Chr1	13625189	13632772	-
AT1TE44660	Chr1	13643188	13644511	-
AT1TE44675	Chr1	13649001	13649326	-
AT1TE44680	Chr1	13649326	13650463	-
AT1TE44690	Chr1	13650501	13654369	-
AT1TE44700	Chr1	13654402	13654645	-
AT1TE44770	Chr1	13677268	13680779	-
AT1G36325	Chr1	13681704	13683045	-
AT1TE44825	Chr1	13690718	13693207	+
AT1TE44895	Chr1	13708141	13709758	+
AT1TE44905	Chr1	13711058	13712501	+
AT1TE44910	Chr1	13712508	13714228	-
AT1TE44925	Chr1	13714762	13715002	-
AT1TE44945	Chr1	13719499	13721663	+
AT1TE44950	Chr1	13719685	13720042	+
AT1TE44965	Chr1	13723189	13724194	+
AT1TE44975	Chr1	13725404	13725795	+
AT1TE44980	Chr1	13725795	13728135	-
AT1TE44985	Chr1	13730390	13731324	+
AT1TE45010	Chr1	13732969	13734491	+
AT1TE45020	Chr1	13734679	13743201	-
AT1TE45050	Chr1	13748186	13748454	-
AT1TE45080	Chr1	13751045	13757083	+
AT1TE45090	Chr1	13757122	13758799	+
AT1TE45120	Chr1	13764317	13765814	+
AT1TE45135	Chr1	13768753	13777586	+
AT1TE45145	Chr1	13777610	13785849	-
AT1TE45160	Chr1	13782305	13784780	-
AT1TE45165	Chr1	13784780	13785497	-
AT1TE45175	Chr1	13786684	13795195	+
AT1TE45180	Chr1	13795195	13796032	+
AT1TE45210	Chr1	13800666	13801784	-
AT1TE45220	Chr1	13803948	13806829	+
AT1TE45315	Chr1	13818559	13823827	+
AT1TE45330	Chr1	13825125	13826189	-
AT1TE45335	Chr1	13826189	13826735	-
AT1TE45355	Chr1	13828484	13832149	+
AT1TE45360	Chr1	13832175	13834264	-
AT1TE45365	Chr1	13834264	13835790	-
AT1TE45380	Chr1	13840159	13840729	-
AT1TE45390	Chr1	13841051	13841405	-
AT1TE45395	Chr1	13842618	13847118	-
AT1TE45475	Chr1	13862958	13864749	-
AT1TE45510	Chr1	13871157	13871383	+
AT1TE45515	Chr1	13873436	13876440	-
AT1G36745	Chr1	13911137	13911679	+
AT1TE45675	Chr1	13913517	13913787	+
AT1TE45680	Chr1	13913795	13915110	+
AT1TE45695	Chr1	13915199	13917482	+
AT1G36756	Chr1	13917331	13917816	+
AT1TE45705	Chr1	13917577	13919016	+
AT1TE45710	Chr1	13920721	13922110	-
AT1TE45715	Chr1	13922110	13925068	+
AT1TE45735	Chr1	13928742	13935988	+
AT1TE45740	Chr1	13929930	13930998	+
AT1TE45745	Chr1	13931179	13931785	+
AT1TE45770	Chr1	13936045	13937056	+
AT1TE45775	Chr1	13937238	13937843	+
AT1TE45780	Chr1	13937843	13939631	+
AT1TE45785	Chr1	13939977	13940762	+
AT1TE45790	Chr1	13940762	13947032	-
AT1TE45795	Chr1	13947032	13950715	-
AT1TE45800	Chr1	13950717	13955653	-
AT1TE45805	Chr1	13955653	13959379	+
AT1TE45815	Chr1	13959437	13961274	-
AT1TE45820	Chr1	13961274	13961618	-
AT1TE45855	Chr1	13968110	13979022	-
AT1TE45860	Chr1	13971992	13974028	+
AT1TE45870	Chr1	13974845	13975522	-
AT1G36920	Chr1	13982995	13984424	+
AT1G36960	Chr1	14014796	14015508	+
AT1G36970	Chr1	14016385	14018356	-
AT1TE46045	Chr1	14017756	14018356	+
AT1TE46065	Chr1	14021369	14024147	+
AT1G37000	Chr1	14036038	14037145	+
AT1TE46150	Chr1	14046609	14047062	-
AT1G37020	Chr1	14046735	14049742	+
AT1TE46170	Chr1	14053504	14054914	+
AT1TE46180	Chr1	14056416	14058432	-
AT1TE46190	Chr1	14059069	14060612	+
AT1TE46195	Chr1	14060612	14060828	-
AT1TE46200	Chr1	14060828	14061200	-
AT1TE46205	Chr1	14061487	14061769	-
AT1TE46215	Chr1	14062306	14063914	+
AT1TE46230	Chr1	14069499	14070821	+
AT1TE46235	Chr1	14070821	14075427	+
AT1TE46255	Chr1	14076942	14080234	-
AT1TE46260	Chr1	14080250	14082586	+
AT1TE46265	Chr1	14082586	14094068	+
AT1TE46270	Chr1	14094068	14097504	+
AT1TE46275	Chr1	14095841	14096232	-
AT1TE46290	Chr1	14097591	14097911	+
AT1TE46305	Chr1	14098633	14101812	-
AT1TE46315	Chr1	14102479	14102760	-
AT1TE46330	Chr1	14109013	14112560	-
AT1TE46335	Chr1	14113718	14114341	-
AT1TE46355	Chr1	14116033	14116840	-
AT1TE46360	Chr1	14117384	14117657	-
AT1TE46370	Chr1	14118613	14118975	-
AT1TE46405	Chr1	14129760	14134840	-
AT1G37113	Chr1	14136413	14138703	+
AT1TE46415	Chr1	14139229	14139495	+
AT1TE46430	Chr1	14140132	14140939	+
AT1TE46445	Chr1	14144306	14145694	-
AT1TE46630	Chr1	14193584	14194819	-
AT1TE46635	Chr1	14196922	14206946	-
AT1TE46645	Chr1	14208773	14211194	+
AT1TE46660	Chr1	14212698	14214745	+
AT1TE46665	Chr1	14214746	14225656	-
AT1TE46680	Chr1	14225656	14226700	+
AT1TE46685	Chr1	14226700	14230059	+
AT1TE46690	Chr1	14230070	14242310	+
AT1TE46700	Chr1	14232763	14235750	+
AT1TE46710	Chr1	14235750	14236844	+
AT1TE46725	Chr1	14237028	14237449	+
AT1TE46735	Chr1	14237573	14241004	+
AT1TE46755	Chr1	14242403	14248337	+
AT1TE46760	Chr1	14248337	14248936	+
AT1TE46765	Chr1	14248936	14255843	+
AT1TE46770	Chr1	14255843	14257875	-
AT1TE46775	Chr1	14257875	14259091	-
AT1TE46780	Chr1	14259091	14261082	-
AT1TE46785	Chr1	14261082	14261587	+
AT1TE46795	Chr1	14262179	14263528	+
AT1TE46805	Chr1	14263551	14273951	-
AT1TE46810	Chr1	14267045	14268443	-
AT1TE46825	Chr1	14273955	14277544	+
AT1TE46830	Chr1	14277550	14282138	-
AT1TE46835	Chr1	14280174	14281809	-
AT1TE46960	Chr1	14301648	14302414	+
AT1TE46970	Chr1	14302526	14302868	+
AT1TE47035	Chr1	14311850	14327652	+
AT1TE47075	Chr1	14327707	14328119	+
AT1TE47080	Chr1	14328155	14329803	+
AT1TE47085	Chr1	14330004	14330413	+
AT1TE47095	Chr1	14331004	14332548	-
AT1TE47100	Chr1	14334054	14334330	-
AT1TE47115	Chr1	14341291	14341670	-
AT1TE47135	Chr1	14345242	14346432	+
AT1TE47145	Chr1	14346918	14349130	+
AT1TE47160	Chr1	14350163	14350415	+
AT1TE47165	Chr1	14350416	14350625	+
AT1TE47175	Chr1	14350912	14352041	+
AT1TE47190	Chr1	14352606	14353475	+
AT1TE47195	Chr1	14353180	14353977	+
AT1TE47200	Chr1	14353978	14354438	+
AT1TE47210	Chr1	14354919	14355403	+
AT1TE47220	Chr1	14355645	14356801	+
AT1TE47230	Chr1	14357678	14358254	-
AT1TE47235	Chr1	14358255	14362049	-
AT1TE47240	Chr1	14359721	14360155	+
AT1TE47255	Chr1	14364204	14365893	+
AT1TE47260	Chr1	14365895	14366400	-
AT1TE47265	Chr1	14366401	14367659	-
AT1TE47280	Chr1	14368381	14375118	+
AT1TE47285	Chr1	14375119	14375385	-
AT1TE47290	Chr1	14375398	14375766	+
AT1TE47305	Chr1	14379492	14381177	-
AT1TE47310	Chr1	14381353	14381662	+
AT1TE47325	Chr1	14383838	14384611	+
AT1TE47330	Chr1	14384612	14384991	-
AT1TE47340	Chr1	14385032	14390221	+
AT1TE47360	Chr1	14392086	14392568	+
AT1TE47375	Chr1	14395330	14395815	+
AT1TE47385	Chr1	14396069	14396278	+
AT1TE47395	Chr1	14396565	14397694	+
AT1TE47410	Chr1	14398259	14399128	+
AT1TE47415	Chr1	14398833	14399630	+
AT1TE47420	Chr1	14399631	14400091	+
AT1TE47430	Chr1	14400572	14401056	+
AT1TE47440	Chr1	14401298	14402454	+
AT1TE47450	Chr1	14403331	14403907	-
AT1TE47455	Chr1	14403908	14407702	-
AT1TE47460	Chr1	14405374	14405808	+
AT1TE47480	Chr1	14411548	14412053	-
AT1TE47485	Chr1	14412054	14413312	-
AT1TE47495	Chr1	14413313	14414030	-
AT1TE47500	Chr1	14414031	14420771	+
AT1TE47505	Chr1	14420772	14421038	-
AT1TE47515	Chr1	14421426	14422867	-
AT1TE47530	Chr1	14427006	14427315	+
AT1TE47540	Chr1	14427921	14449178	+
AT1TE47545	Chr1	14429067	14430800	-
AT1TE47550	Chr1	14432222	14442952	+
AT1TE47575	Chr1	14451470	14451891	-
AT1TE47580	Chr1	14451910	14457104	+
AT1TE47595	Chr1	14457777	14459459	+
AT1TE47605	Chr1	14459459	14461676	+
AT1TE47610	Chr1	14462781	14463254	+
AT1TE47630	Chr1	14464209	14465550	+
AT1TE47640	Chr1	14466419	14467530	+
AT1TE47645	Chr1	14467537	14468313	-
AT1TE47650	Chr1	14468417	14468752	-
AT1TE47675	Chr1	14474711	14476323	+
AT1TE47685	Chr1	14476830	14478089	-
AT1TE47690	Chr1	14478089	14478727	-
AT1TE47715	Chr1	14484871	14486672	+
AT1TE47720	Chr1	14487436	14492869	+
AT1TE47725	Chr1	14488372	14489795	-
AT1TE47730	Chr1	14489796	14491652	+
AT1TE47735	Chr1	14491670	14492096	-
AT1TE47750	Chr1	14493851	14498848	+
AT1TE47760	Chr1	14499172	14499493	+
AT1TE47775	Chr1	14503023	14504548	+
AT1TE47780	Chr1	14504548	14507555	+
AT1TE47880	Chr1	14538941	14540986	-
AT1G38790	Chr1	14543277	14544528	-
AT1TE48020	Chr1	14582193	14587448	-
AT1TE48025	Chr1	14587448	14588322	-
AT1TE48030	Chr1	14588473	14590167	-
AT1TE48035	Chr1	14590167	14598729	-
AT1TE48040	Chr1	14598729	14600111	-
AT1TE48045	Chr1	14600111	14602815	+
AT1TE48225	Chr1	14662283	14664772	-
AT1TE48230	Chr1	14664772	14669652	-
AT1TE48240	Chr1	14673837	14674639	+
AT1G39060	Chr1	14701718	14703805	+
AT1TE48475	Chr1	14747212	14750320	-
AT1TE48670	Chr1	14816664	14818335	+
AT1TE48700	Chr1	14825788	14827235	-
AT1TE48705	Chr1	14829785	14830590	+
AT1TE48720	Chr1	14833179	14835287	-
AT1TE48730	Chr1	14837663	14845083	-
AT1TE48735	Chr1	14845083	14847384	-
AT1TE48745	Chr1	14847804	14857361	+
AT1TE48750	Chr1	14857362	14859911	-
AT1TE48760	Chr1	14864081	14865438	+
AT1TE48765	Chr1	14865438	14874995	-
AT1TE48775	Chr1	14875415	14885131	+
AT1TE48830	Chr1	14891976	14897732	-
AT1TE48835	Chr1	14897775	14908757	-
AT1TE48850	Chr1	14910878	14912856	+
AT1TE48860	Chr1	14913116	14914150	-
AT1TE48885	Chr1	14919311	14919545	-
AT1TE48895	Chr1	14922821	14923070	-
AT1TE48905	Chr1	14923605	14926963	+
AT1TE49155	Chr1	15006088	15007723	-
AT1TE49160	Chr1	15007723	15008049	-
AT1TE49260	Chr1	15038154	15052790	-
AT1TE49265	Chr1	15053676	15056565	+
AT1TE49285	Chr1	15058248	15060097	-
AT1TE49295	Chr1	15060126	15061270	-
AT1TE49300	Chr1	15061270	15069809	-
AT1TE49320	Chr1	15069809	15074155	-
AT1TE49325	Chr1	15074169	15076081	-
AT1TE49330	Chr1	15076083	15078266	-
AT1TE49335	Chr1	15078266	15078560	-
AT1TE49340	Chr1	15078560	15078779	-
AT1TE49345	Chr1	15079960	15081161	+
AT1TE49360	Chr1	15087256	15087580	+
AT1TE49375	Chr1	15089939	15091579	-
AT1TE49385	Chr1	15091850	15093829	-
AT1TE49390	Chr1	15093010	15093355	-
AT1TE49395	Chr1	15093829	15094043	-
AT1TE49410	Chr1	15095327	15098439	-
AT1TE49450	Chr1	15103609	15104914	-
AT1TE49460	Chr1	15106341	15107028	-
AT1TE49465	Chr1	15107028	15107713	-
AT1TE49470	Chr1	15107713	15108193	-
AT1TE49475	Chr1	15108193	15108852	-
AT1TE49480	Chr1	15108852	15112238	-
AT1TE49495	Chr1	15112238	15112514	-
AT1TE49510	Chr1	15113935	15116186	-
AT1TE49515	Chr1	15114786	15115191	-
AT1TE49530	Chr1	15117309	15118501	-
AT1TE49535	Chr1	15118502	15118726	-
AT1TE49540	Chr1	15118726	15122535	-
AT1TE49545	Chr1	15118810	15119651	-
AT1TE49550	Chr1	15121501	15122018	-
AT1TE49570	Chr1	15124278	15127167	-
AT1TE49580	Chr1	15127168	15127553	-
AT1TE49590	Chr1	15127857	15128770	-
AT1TE49595	Chr1	15128771	15130450	-
AT1TE49600	Chr1	15129928	15130149	-
AT1TE49610	Chr1	15130979	15131229	-
AT1TE49630	Chr1	15132729	15133866	-
AT1TE49635	Chr1	15133867	15134088	-
AT1TE49640	Chr1	15134088	15134388	-
AT1TE49650	Chr1	15135167	15136463	-
AT1TE49665	Chr1	15137430	15138658	-
AT1TE49670	Chr1	15138834	15139067	+
AT1TE49675	Chr1	15139695	15142452	+
AT1TE49695	Chr1	15143172	15144446	-
AT1TE49700	Chr1	15144446	15144946	-
AT1TE49705	Chr1	15144946	15145210	-
AT1TE49710	Chr1	15145220	15145719	-
AT1TE49720	Chr1	15145997	15146623	-
AT1TE49740	Chr1	15151061	15158195	+
AT1TE49755	Chr1	15160856	15166563	+
AT1TE49765	Chr1	15166788	15169117	-
AT1TE49780	Chr1	15169117	15171671	-
AT1TE49790	Chr1	15170083	15170321	-
AT1TE49795	Chr1	15172071	15172304	-
AT1TE49800	Chr1	15172305	15172576	-
AT1TE49805	Chr1	15172576	15173462	-
AT1TE49810	Chr1	15173462	15174824	-
AT1TE49815	Chr1	15174321	15174592	-
AT1TE49825	Chr1	15174825	15175683	-
AT1TE49830	Chr1	15176823	15178336	-
AT1TE49835	Chr1	15177408	15177670	-
AT1TE49840	Chr1	15178529	15178812	-
AT1TE49845	Chr1	15178936	15186992	+
AT1TE49850	Chr1	15186992	15192976	+
AT1TE49860	Chr1	15193569	15194022	-
AT1TE49865	Chr1	15194022	15194675	-
AT1TE49870	Chr1	15194675	15196996	-
AT1TE49885	Chr1	15197741	15199555	-
AT1TE49895	Chr1	15200022	15200536	-
AT1TE49900	Chr1	15200536	15201505	-
AT1TE49915	Chr1	15202202	15202485	-
AT1TE49920	Chr1	15202485	15204897	-
AT1TE49925	Chr1	15204897	15205715	-
AT1TE49930	Chr1	15205192	15205400	-
AT1TE49945	Chr1	15206506	15207845	-
AT1TE49950	Chr1	15208199	15209311	-
AT1TE49955	Chr1	15209311	15215968	+
AT1TE49960	Chr1	15215968	15220007	-
AT1TE49975	Chr1	15220326	15220989	-
AT1TE49990	Chr1	15221985	15223943	-
AT1TE50000	Chr1	15223944	15225219	-
AT1TE50005	Chr1	15225732	15225979	-
AT1TE50020	Chr1	15227238	15229687	-
AT1TE50030	Chr1	15229687	15229927	-
AT1TE50035	Chr1	15229928	15230408	-
AT1TE50050	Chr1	15231166	15232066	-
AT1TE50055	Chr1	15232067	15233436	-
AT1TE50065	Chr1	15233913	15234391	-
AT1TE50075	Chr1	15234665	15235089	-
AT1TE50080	Chr1	15235362	15235856	-
AT1TE50085	Chr1	15235857	15236842	-
AT1TE50105	Chr1	15238029	15240421	-
AT1TE50115	Chr1	15240538	15244617	+
AT1G40129	Chr1	15240553	15244036	+
AT1TE50140	Chr1	15246024	15248014	-
AT1TE50145	Chr1	15248015	15252091	-
AT1TE50155	Chr1	15248946	15249187	-
AT1TE50160	Chr1	15251126	15251367	-
AT1TE50165	Chr1	15252092	15253294	-
AT1TE50170	Chr1	15253938	15254219	-
AT1TE50210	Chr1	15259182	15259588	-
AT1TE50220	Chr1	15259927	15263897	-
AT1TE50225	Chr1	15261190	15261422	-
AT1TE50230	Chr1	15261423	15261829	-
AT1TE50235	Chr1	15262110	15263192	-
AT1TE50260	Chr1	15267477	15269583	-
AT1TE50270	Chr1	15270566	15274254	-
AT1TE50275	Chr1	15271550	15273888	-
AT1TE50280	Chr1	15274867	15277023	-
AT1TE50285	Chr1	15275866	15276438	-
AT1TE50295	Chr1	15277533	15277792	+
AT1TE50300	Chr1	15277990	15279016	-
AT1TE50305	Chr1	15279017	15280077	-
AT1TE50315	Chr1	15280449	15289511	+
AT1TE50335	Chr1	15289860	15290591	-
AT1TE50340	Chr1	15291184	15292063	-
AT1TE50345	Chr1	15292160	15296694	+
AT1TE50365	Chr1	15297360	15299719	-
AT1TE50375	Chr1	15300274	15308042	+
AT1TE50380	Chr1	15308044	15308539	-
AT1TE50385	Chr1	15308540	15310254	-
AT1TE50390	Chr1	15310255	15310907	-
AT1TE50400	Chr1	15312019	15313134	+
AT1TE50415	Chr1	15313564	15316162	-
AT1TE50425	Chr1	15316481	15317144	-
AT1TE50435	Chr1	15318105	15319617	-
AT1TE50445	Chr1	15318703	15319907	-
AT1TE50450	Chr1	15319908	15321345	-
AT1TE50470	Chr1	15323541	15324969	-
AT1TE50475	Chr1	15324970	15325947	-
AT1TE50485	Chr1	15325991	15327528	-
AT1TE50495	Chr1	15327529	15331031	-
AT1TE50510	Chr1	15331032	15331783	-
AT1TE50515	Chr1	15331784	15332208	-
AT1TE50525	Chr1	15332511	15332734	-
AT1TE50535	Chr1	15333047	15335354	-
AT1TE50550	Chr1	15336921	15337560	-
AT1TE50560	Chr1	15337657	15341736	+
AT1TE50590	Chr1	15344656	15345377	-
AT1TE50615	Chr1	15346849	15349464	-
AT1TE50620	Chr1	15346864	15348553	-
AT1TE50635	Chr1	15350189	15351395	-
AT1TE50660	Chr1	15355080	15355490	-
AT1TE50665	Chr1	15355824	15357733	-
AT1TE50670	Chr1	15357048	15357278	-
AT1TE50675	Chr1	15357279	15357685	-
AT1TE50680	Chr1	15357957	15358683	-
AT1TE50685	Chr1	15358684	15360924	-
AT1TE50695	Chr1	15360925	15361200	-
AT1TE50705	Chr1	15361492	15361799	-
AT1TE50720	Chr1	15365574	15366243	-
AT1TE50730	Chr1	15367099	15367337	-
AT1TE50735	Chr1	15367338	15368063	-
AT1TE50745	Chr1	15369647	15371985	-
AT1TE50750	Chr1	15372964	15375160	-
AT1TE50755	Chr1	15373963	15374535	-
AT1TE50775	Chr1	15378553	15387615	+
AT1TE50790	Chr1	15387616	15388695	-
AT1TE50795	Chr1	15389287	15398355	-
AT1TE50800	Chr1	15390263	15394797	+
AT1TE50805	Chr1	15394956	15395627	-
AT1TE50810	Chr1	15398356	15406124	+
AT1TE50850	Chr1	15410104	15411044	+
AT1TE50855	Chr1	15412109	15412720	-
AT1TE50860	Chr1	15412723	15420826	+
AT1TE50875	Chr1	15419174	15420289	+
AT1TE50885	Chr1	15420951	15421858	-
AT1TE50890	Chr1	15421858	15428011	-
AT1TE50895	Chr1	15422079	15423710	+
AT1TE50900	Chr1	15424982	15426176	+
AT1TE50905	Chr1	15426176	15427796	-
AT1TE50925	Chr1	15429645	15430414	-
AT1TE50930	Chr1	15430414	15430652	-
AT1TE50945	Chr1	15431701	15433006	-
AT1G40390	Chr1	15432576	15434674	-
AT1TE50955	Chr1	15434786	15435565	-
AT1TE50965	Chr1	15436435	15436642	+
AT1TE50970	Chr1	15438174	15438493	+
AT1TE50975	Chr1	15438845	15440903	+
AT1TE50985	Chr1	15441563	15443621	-
AT1TE50995	Chr1	15444491	15444814	+
AT1TE51000	Chr1	15445238	15448968	-
AT1TE51005	Chr1	15448968	15450627	-
AT1TE51020	Chr1	15450854	15454302	-
AT1TE51035	Chr1	15455170	15455487	+
AT1TE51040	Chr1	15455487	15486506	+
AT1TE51045	Chr1	15486510	15491848	-
AT1TE51050	Chr1	15491849	15499762	+
AT1TE51055	Chr1	15499762	15500387	+
AT1TE51065	Chr1	15500422	15504894	+
AT1TE51070	Chr1	15504894	15509412	-
AT1TE51075	Chr1	15509414	15512097	-
AT1TE51080	Chr1	15512097	15519432	-
AT1TE51085	Chr1	15519450	15522308	-
AT1TE51090	Chr1	15523591	15524050	+
AT1TE51100	Chr1	15524077	15525003	-
AT1TE51105	Chr1	15525405	15530074	+
AT1TE51120	Chr1	15530074	15533816	-
AT1TE51125	Chr1	15530424	15532919	-
AT1TE51135	Chr1	15533899	15534153	+
AT1TE51140	Chr1	15534155	15535457	+
AT1TE51150	Chr1	15535483	15536104	-
AT1TE51155	Chr1	15536119	15546208	-
AT1TE51160	Chr1	15546209	15546471	+
AT1TE51170	Chr1	15546603	15547274	+
AT1TE51175	Chr1	15547274	15549791	+
AT1TE51180	Chr1	15548453	15548782	+
AT1TE51200	Chr1	15554229	15554880	-
AT1TE51205	Chr1	15554880	15555163	-
AT1TE51210	Chr1	15555163	15557533	-
AT1TE51215	Chr1	15557533	15559659	-
AT1TE51225	Chr1	15559746	15560396	-
AT1TE51230	Chr1	15560396	15560684	-
AT1TE51235	Chr1	15560684	15569184	-
AT1TE51245	Chr1	15562038	15567091	+
AT1TE51250	Chr1	15569184	15569643	-
AT1TE51255	Chr1	15569643	15570478	+
AT1TE51260	Chr1	15570478	15581789	+
AT1TE51265	Chr1	15572379	15580018	+
AT1TE51270	Chr1	15581789	15582052	+
AT1TE51275	Chr1	15582062	15585032	-
AT1G41820	Chr1	15582423	15585143	-
AT1TE51295	Chr1	15588987	15590261	+
AT1TE51305	Chr1	15590406	15594101	+
AT1TE51310	Chr1	15594101	15594925	+
AT1TE51315	Chr1	15594925	15598833	+
AT1TE51320	Chr1	15596130	15596723	+
AT1TE51370	Chr1	15616245	15618055	-
AT1TE51405	Chr1	15624480	15625637	+
AT1TE51415	Chr1	15626584	15627240	+
AT1TE51420	Chr1	15627367	15629085	+
AT1TE51425	Chr1	15629085	15629702	+
AT1TE51475	Chr1	15636762	15639274	+
AT1TE51480	Chr1	15639274	15639886	+
AT1TE51485	Chr1	15639888	15641103	+
AT1TE51545	Chr1	15646120	15647086	-
AT1TE51555	Chr1	15647288	15649158	+
AT1TE51570	Chr1	15654342	15656208	-
AT1TE51580	Chr1	15657481	15661620	+
AT1TE51590	Chr1	15662168	15662410	+
AT1TE51600	Chr1	15662678	15663195	+
AT1TE51615	Chr1	15665055	15674411	+
AT1TE51645	Chr1	15676216	15683600	-
AT1TE51650	Chr1	15677553	15680600	+
AT1G41920	Chr1	15680978	15684487	-
AT1TE51665	Chr1	15685431	15687581	+
AT1TE51685	Chr1	15690798	15692926	+
AT1TE51690	Chr1	15692926	15697905	+
AT1TE51695	Chr1	15697905	15698423	+
AT1TE51700	Chr1	15698425	15701729	+
AT1TE51705	Chr1	15699975	15701631	+
AT1TE51710	Chr1	15701729	15702009	+
AT1TE51725	Chr1	15703276	15703679	-
AT1TE51735	Chr1	15703959	15715037	-
AT1TE51740	Chr1	15715050	15715611	-
AT1G42080	Chr1	15716714	15717169	-
AT1TE51745	Chr1	15717179	15719722	+
AT1TE51750	Chr1	15719722	15720075	+
AT1TE51775	Chr1	15725601	15727426	+
AT1TE51780	Chr1	15727767	15729042	+
AT1TE51810	Chr1	15732695	15733069	+
AT1TE51820	Chr1	15733069	15745010	+
AT1TE51825	Chr1	15735668	15738170	-
AT1TE51830	Chr1	15738170	15742393	-
AT1TE51835	Chr1	15745010	15746461	+
AT1TE51845	Chr1	15748098	15750261	+
AT1TE51850	Chr1	15750263	15755704	+
AT1TE51855	Chr1	15755704	15757547	+
AT1TE51870	Chr1	15758846	15759249	-
AT1TE51900	Chr1	15761331	15762254	-
AT1TE51905	Chr1	15762274	15762925	-
AT1TE51910	Chr1	15762943	15766494	-
AT1TE51920	Chr1	15764451	15764882	+
AT1TE51945	Chr1	15766555	15767338	-
AT1TE51950	Chr1	15767338	15768468	-
AT1TE51960	Chr1	15768496	15770736	-
AT1TE51965	Chr1	15770763	15771086	+
AT1TE51970	Chr1	15771086	15772102	-
AT1TE51980	Chr1	15772545	15772974	+
AT1TE51985	Chr1	15772984	15790136	+
AT1TE51990	Chr1	15784487	15786430	-
AT1TE52000	Chr1	15790136	15791906	-
AT1TE52010	Chr1	15792668	15794826	-
AT1TE52025	Chr1	15799513	15807462	+
AT1TE52035	Chr1	15807869	15808308	-
AT1TE52040	Chr1	15808308	15809636	+
AT1TE52050	Chr1	15810041	15811238	-
AT1TE52070	Chr1	15813315	15814443	-
AT1TE52075	Chr1	15815568	15816220	+
AT1TE52085	Chr1	15816321	15821314	-
AT1TE52095	Chr1	15819545	15821124	+
AT1TE52105	Chr1	15821412	15847509	-
AT1TE52110	Chr1	15822575	15826633	-
AT1TE52120	Chr1	15826666	15827286	-
AT1TE52125	Chr1	15827286	15838845	-
AT1TE52135	Chr1	15838878	15839498	-
AT1TE52160	Chr1	15847509	15852729	-
AT1TE52165	Chr1	15851016	15851382	-
AT1TE52170	Chr1	15852729	15855572	-
AT1TE52200	Chr1	15857270	15872649	+
AT1TE52205	Chr1	15867720	15871376	+
AT1TE52220	Chr1	15872971	15879297	+
AT1TE52385	Chr1	15909053	15909855	+
AT1TE52420	Chr1	15911534	15917462	+
AT1TE52425	Chr1	15914047	15914385	+
AT1TE52590	Chr1	15950603	15958318	-
AT1TE52595	Chr1	15958806	15959344	-
AT1G42525	Chr1	15966381	15968239	+
AT1TE52630	Chr1	15970140	15970583	-
AT1TE52700	Chr1	15987259	15988791	+
AT1TE52715	Chr1	15991519	15992798	-
AT1TE52735	Chr1	15997136	16000277	-
AT1TE52740	Chr1	16000934	16003031	-
AT1TE52750	Chr1	16004974	16005339	-
AT1TE52760	Chr1	16006206	16006536	+
AT1TE52765	Chr1	16007082	16008873	+
AT1TE52775	Chr1	16009303	16009976	-
AT1TE52790	Chr1	16012032	16012415	-
AT1TE52810	Chr1	16023127	16024273	+
AT1TE52815	Chr1	16025306	16025576	+
AT1TE52830	Chr1	16031000	16032234	+
AT1TE52835	Chr1	16034405	16034719	+
AT1G42615	Chr1	16037606	16038455	+
AT1TE52855	Chr1	16038518	16038907	+
AT1TE52860	Chr1	16038907	16045334	+
AT1G42680	Chr1	16041656	16042880	+
AT1TE52865	Chr1	16045334	16049209	+
AT1TE52875	Chr1	16053085	16053714	-
AT1TE52880	Chr1	16054520	16055754	+
AT1TE52885	Chr1	16055754	16058562	-
AT1TE52890	Chr1	16058835	16059164	-
AT1TE52895	Chr1	16059164	16061322	+
AT1TE52925	Chr1	16070136	16074320	+
AT1G42710	Chr1	16077592	16078567	-
AT1TE52940	Chr1	16078726	16079631	-
AT1TE52945	Chr1	16079631	16080531	+
AT1TE52950	Chr1	16080533	16089067	+
AT1TE52960	Chr1	16089101	16089995	+
AT1TE52965	Chr1	16089995	16090523	+
AT1TE52970	Chr1	16090523	16093188	-
AT1TE52975	Chr1	16093188	16093881	-
AT1TE52985	Chr1	16094141	16097900	-
AT1TE52990	Chr1	16097900	16099192	-
AT1TE52995	Chr1	16099420	16099668	-
AT1TE53000	Chr1	16099668	16104812	-
AT1TE53030	Chr1	16106230	16109971	-
AT1TE53035	Chr1	16109971	16110287	-
AT1TE53050	Chr1	16110655	16112323	+
AT1TE53060	Chr1	16112355	16113422	+
AT1TE53090	Chr1	16117828	16122859	+
AT1TE53095	Chr1	16122859	16124077	+
AT1TE53320	Chr1	16176731	16177990	+
AT1TE53330	Chr1	16178488	16181520	+
AT1TE53370	Chr1	16188965	16191015	+
AT1TE53375	Chr1	16191015	16193353	+
AT1TE53380	Chr1	16193921	16194406	+
AT1TE53390	Chr1	16194665	16198716	+
AT1TE53395	Chr1	16198716	16203798	+
AT1TE53405	Chr1	16209059	16209861	+
AT1TE53415	Chr1	16211533	16213841	+
AT1TE53435	Chr1	16225360	16225685	+
AT1G43145	Chr1	16238525	16240015	+
AT1TE53470	Chr1	16240476	16244557	+
AT1TE53620	Chr1	16279382	16279742	+
AT1TE53625	Chr1	16279742	16280141	-
AT1TE53710	Chr1	16311523	16316838	+
AT1G43260	Chr1	16318253	16319234	+
AT1TE53725	Chr1	16318841	16319152	+
AT1TE53730	Chr1	16319998	16320280	+
AT1G43310	Chr1	16345916	16346475	-
AT1G43320	Chr1	16356762	16357118	+
AT1TE53955	Chr1	16368184	16368540	+
AT1TE53960	Chr1	16368540	16369914	+
AT1TE53970	Chr1	16369970	16375017	-
AT1TE53975	Chr1	16375017	16379642	+
AT1TE53985	Chr1	16377779	16378958	-
AT1G43415	Chr1	16378974	16379405	+
AT1TE53995	Chr1	16380110	16387683	-
AT1TE54000	Chr1	16389849	16392463	+
AT1TE54060	Chr1	16405733	16406476	-
AT1TE54075	Chr1	16406731	16407941	-
AT1G43665	Chr1	16452981	16453804	-
AT1TE54405	Chr1	16492933	16493332	+
AT1G43720	Chr1	16495080	16496078	+
AT1G43722	Chr1	16496403	16497377	+
AT1TE54420	Chr1	16496911	16497372	+
AT1TE54440	Chr1	16501403	16502940	+
AT1TE54445	Chr1	16501576	16502669	-
AT1TE54450	Chr1	16504653	16505537	+
AT1TE54455	Chr1	16505599	16506274	+
AT1G43730	Chr1	16508723	16509784	-
AT1TE54480	Chr1	16509814	16528903	-
AT1G43760	Chr1	16528880	16531065	-
AT1TE54485	Chr1	16531299	16531668	+
AT1TE54500	Chr1	16531788	16533312	+
AT1TE54510	Chr1	16533570	16533779	+
AT1TE54580	Chr1	16551473	16551715	+
AT1TE54585	Chr1	16551715	16557069	-
AT1TE54590	Chr1	16557069	16557858	+
AT1TE54600	Chr1	16557972	16558890	+
AT1TE54625	Chr1	16569872	16575243	-
AT1G43815	Chr1	16582084	16584556	+
AT1TE54645	Chr1	16582724	16583222	+
AT1TE54655	Chr1	16584100	16586369	+
AT1G43825	Chr1	16608603	16608818	-
AT1TE54970	Chr1	16674907	16675422	+
AT1TE54975	Chr1	16675424	16676972	+
AT1TE54990	Chr1	16677343	16680139	+
AT1G43970	Chr1	16681269	16682933	+
AT1TE55070	Chr1	16691747	16695154	-
AT1TE55075	Chr1	16695154	16697937	-
AT1TE55090	Chr1	16698313	16699068	-
AT1TE55105	Chr1	16701009	16701424	+
AT1TE55180	Chr1	16710550	16711103	+
AT1G44020	Chr1	16715972	16718656	-
AT1G44030	Chr1	16724237	16726752	-
AT1TE55295	Chr1	16732148	16733523	-
AT1TE55320	Chr1	16742378	16751122	-
AT1TE55795	Chr1	16853328	16858040	-
AT1TE56365	Chr1	17017021	17018618	+
AT1TE56390	Chr1	17023915	17029257	-
AT1TE56395	Chr1	17029260	17029605	-
AT1TE56400	Chr1	17029605	17030400	+
AT1TE56420	Chr1	17035032	17050039	+
AT1TE56425	Chr1	17035064	17050021	+
AT1TE56990	Chr1	17196166	17197459	+
AT1TE57025	Chr1	17203925	17206318	+
AT1TE57060	Chr1	17215220	17216165	+
AT1G46336	Chr1	17230411	17230653	-
AT1TE57220	Chr1	17257526	17261439	+
AT1TE57225	Chr1	17261439	17261807	+
AT1G46696	Chr1	17261860	17264183	-
AT1TE57380	Chr1	17315440	17315703	-
AT1TE57385	Chr1	17316649	17316856	-
AT1TE57530	Chr1	17360725	17365910	+
AT1TE57655	Chr1	17406544	17409066	-
AT1TE57675	Chr1	17410345	17410971	-
AT1TE57695	Chr1	17411985	17413128	-
AT1TE58060	Chr1	17515483	17515727	+
AT1TE58075	Chr1	17520594	17525126	+
AT1G47657	Chr1	17531871	17535174	+
AT1TE58100	Chr1	17532165	17532763	-
AT1TE58105	Chr1	17533773	17534050	+
AT1G47660	Chr1	17533941	17535551	-
AT1TE58240	Chr1	17555179	17555711	-
AT1G47940	Chr1	17668285	17669713	+
AT1TE58700	Chr1	17676785	17681203	-
AT1G48285	Chr1	17844350	17844900	-
TEM1039	Chr1	17856273	17856647	+
AT1TE59745	Chr1	18002176	18007370	-
AT1TE59755	Chr1	18013161	18018435	+
AT1TE59860	Chr1	18053194	18054218	-
AT1TE60180	Chr1	18154504	18163494	+
TEM1068	Chr1	18192102	18192892	+
AT1TE60550	Chr1	18271031	18271443	+
AT1TE60665	Chr1	18302776	18304452	+
AT1G49680	Chr1	18386867	18387166	+
AT1TE62360	Chr1	18806507	18807394	-
AT1TE62470	Chr1	18846374	18854882	-
TEM1133	Chr1	18948231	18948436	+
AT1G51172	Chr1	18963205	18965571	+
AT1TE62820	Chr1	18966108	18969386	-
TEM1153	Chr1	19243877	19244220	+
AT1TE64825	Chr1	19595437	19597361	-
AT1TE64830	Chr1	19597361	19599971	-
AT1G52950	Chr1	19725483	19728035	+
AT1TE65225	Chr1	19731889	19732662	+
AT1TE66380	Chr1	20085178	20090143	+
AT1TE67115	Chr1	20312612	20312886	-
AT1TE67125	Chr1	20314695	20315365	-
AT1TE67130	Chr1	20315686	20316157	-
AT1TE67140	Chr1	20316268	20317599	-
AT1G54720	Chr1	20422831	20423754	+
AT1TE67450	Chr1	20423238	20423739	-
AT1TE67645	Chr1	20475898	20477927	-
AT1G55710	Chr1	20825924	20826142	-
AT1TE69795	Chr1	21124889	21125292	-
AT1TE70190	Chr1	21244323	21249205	-
AT1TE70200	Chr1	21249286	21249650	-
AT1TE70490	Chr1	21346161	21351041	-
AT1TE70805	Chr1	21450131	21455990	-
TEM1366	Chr1	21691113	21693021	+
AT1G58525	Chr1	21729913	21731344	+
AT1TE71775	Chr1	21748193	21753388	+
AT1TE71950	Chr1	21796938	21801751	-
AT1TE72060	Chr1	21833196	21838009	-
TEM1389	Chr1	21848063	21849763	+
AT1TE72970	Chr1	22100643	22105329	-
AT1TE73425	Chr1	22231070	22232773	-
AT1TE74285	Chr1	22521081	22521555	-
AT1TE75085	Chr1	22777741	22778187	-
AT1G63540	Chr1	23566958	23569495	+
AT1G64795	Chr1	24082579	24082848	+
AT1G65349	Chr1	24277072	24277443	+
TEM1556	Chr1	24438040	24438520	+
TEM1630	Chr1	25427514	25427804	+
TEM1674	Chr1	26222927	26223131	+
TEM1714	Chr1	27515017	27516631	+
AT1TE96100	Chr1	29377752	29379561	+
AT1TE96425	Chr1	29474554	29479485	+
TEM1782	Chr1	29769084	29770477	+
AT2TE00010	Chr2	10523	13069	-
AT2TE00015	Chr2	13071	29426	-
AT2TE00020	Chr2	29427	30317	+
AT2TE00025	Chr2	30317	31444	+
AT2TE00030	Chr2	31444	42029	+
AT2TE00035	Chr2	31486	33553	+
AT2TE00045	Chr2	34379	36436	+
AT2TE00075	Chr2	42128	49796	-
AT2TE00110	Chr2	58681	64005	-
AT2TE00120	Chr2	65070	67094	-
AT2G01050	Chr2	68337	69884	-
AT2TE01000	Chr2	243803	249211	-
AT2TE01550	Chr2	374588	376262	-
AT2TE02290	Chr2	532332	537391	-
AT2G02520	Chr2	676771	678145	-
AT2G02525	Chr2	677881	678203	+
AT2G02550	Chr2	687384	688764	+
AT2TE03285	Chr2	753051	753260	-
AT2G02835	Chr2	820437	821291	-
AT2G02840	Chr2	821553	822858	+
AT2TE03625	Chr2	824785	825021	+
AT2TE04125	Chr2	924709	925031	-
AT2TE04130	Chr2	926130	929956	-
AT2TE05000	Chr2	1108691	1110025	-
AT2TE05010	Chr2	1110025	1110383	-
AT2TE05535	Chr2	1229232	1229454	+
AT2TE05540	Chr2	1229454	1232487	+
AT2G03965	Chr2	1251510	1252989	+
AT2TE05835	Chr2	1288667	1288912	-
AT2TE05880	Chr2	1297909	1298511	-
AT2TE05885	Chr2	1298511	1298955	+
AT2TE05895	Chr2	1298991	1300169	+
AT2TE05900	Chr2	1300169	1300495	+
AT2TE05910	Chr2	1300851	1301489	-
AT2G04031	Chr2	1304160	1304783	-
AT2TE06040	Chr2	1326795	1330532	+
AT2TE06155	Chr2	1349465	1349739	-
AT2TE06545	Chr2	1422845	1423129	+
AT2TE06610	Chr2	1434588	1435118	+
AT2TE06615	Chr2	1435118	1435378	+
AT2TE06620	Chr2	1435378	1437967	+
AT2TE06885	Chr2	1485440	1490713	-
AT2TE07005	Chr2	1523783	1524096	-
AT2TE07145	Chr2	1547660	1552033	-
AT2TE07380	Chr2	1599599	1600791	-
AT2TE07415	Chr2	1607032	1607740	-
AT2TE07640	Chr2	1649685	1651890	-
AT2TE07725	Chr2	1665232	1668533	+
AT2TE08035	Chr2	1727849	1728277	-
AT2TE08120	Chr2	1757219	1757633	+
AT2TE08135	Chr2	1758539	1766569	-
AT2TE08225	Chr2	1781545	1786791	+
AT2G05050	Chr2	1794035	1795084	+
AT2TE08300	Chr2	1801736	1803472	-
AT2TE08320	Chr2	1804017	1821234	-
AT2TE08385	Chr2	1829456	1832048	-
AT2TE08495	Chr2	1849458	1849904	-
AT2TE08665	Chr2	1883379	1886726	+
AT2TE08785	Chr2	1906834	1912111	-
AT2G05360	Chr2	1956115	1959303	-
AT2TE09100	Chr2	1970283	1974992	+
AT2TE09205	Chr2	1995887	2010496	-
AT2TE09360	Chr2	2035933	2041281	-
AT2TE09500	Chr2	2075338	2080607	-
AT2G05635	Chr2	2089484	2091016	+
AT2TE09565	Chr2	2091083	2092826	-
AT2TE09570	Chr2	2092826	2096399	-
AT2G05642	Chr2	2098087	2101167	-
AT2G05645	Chr2	2101497	2102111	-
AT2TE09610	Chr2	2104400	2104635	-
AT2TE09615	Chr2	2104850	2105072	+
AT2TE09640	Chr2	2110083	2114697	-
AT2TE09650	Chr2	2115378	2115742	-
AT2TE09685	Chr2	2121885	2129089	-
AT2TE09725	Chr2	2134050	2134368	+
AT2TE09735	Chr2	2134452	2137255	+
AT2TE09755	Chr2	2138134	2138396	-
AT2TE09875	Chr2	2153416	2153742	-
AT2TE09955	Chr2	2164242	2167690	+
AT2G05752	Chr2	2169305	2170528	-
AT2TE10075	Chr2	2187309	2188592	-
AT2TE10105	Chr2	2193620	2195420	-
AT2TE10160	Chr2	2203889	2205314	+
AT2TE10170	Chr2	2205355	2205746	+
AT2TE10265	Chr2	2221186	2222415	-
AT2TE10275	Chr2	2225084	2225583	+
AT2TE10355	Chr2	2236526	2240579	-
AT2G05915	Chr2	2263816	2264265	+
AT2TE10495	Chr2	2274202	2280054	+
AT2TE10600	Chr2	2298708	2298979	-
AT2TE10620	Chr2	2302460	2307173	+
AT2TE10900	Chr2	2363476	2363841	-
AT2TE10910	Chr2	2366174	2367075	+
AT2TE10915	Chr2	2367077	2369546	+
AT2TE10925	Chr2	2369619	2371468	+
AT2TE10945	Chr2	2374269	2378354	+
AT2TE10955	Chr2	2378390	2382180	-
AT2TE10965	Chr2	2382673	2389184	-
AT2TE10970	Chr2	2389184	2390869	-
AT2TE10975	Chr2	2390869	2399529	+
AT2G06105	Chr2	2395013	2398395	+
AT2TE10980	Chr2	2399530	2410158	-
AT2TE10985	Chr2	2401124	2402966	-
AT2TE11040	Chr2	2416280	2423558	+
AT2TE11050	Chr2	2418613	2423173	+
AT2TE11110	Chr2	2436993	2442260	-
AT2TE11125	Chr2	2443913	2445960	-
AT2TE11140	Chr2	2446760	2447741	-
AT2TE11145	Chr2	2447741	2454177	+
AT2TE11150	Chr2	2454181	2454397	-
AT2TE11210	Chr2	2461725	2468223	+
AT2TE11215	Chr2	2462889	2463440	+
AT2TE11220	Chr2	2463440	2464621	-
AT2TE11225	Chr2	2464621	2465239	+
AT2TE11230	Chr2	2465243	2465960	+
AT2TE11245	Chr2	2468636	2469090	+
AT2TE11255	Chr2	2470294	2470890	+
AT2TE11275	Chr2	2473161	2473831	-
AT2TE11280	Chr2	2474106	2474563	-
AT2TE11300	Chr2	2479446	2480950	+
AT2TE11315	Chr2	2483255	2484583	+
AT2TE11325	Chr2	2486952	2487779	-
AT2TE11330	Chr2	2487780	2491971	+
AT2TE11350	Chr2	2494503	2500632	+
AT2TE11355	Chr2	2500632	2504274	-
AT2TE11360	Chr2	2504276	2504515	-
AT2TE11370	Chr2	2504979	2510352	-
AT2TE11375	Chr2	2510352	2512186	-
AT2TE11385	Chr2	2512299	2513366	-
AT2TE11400	Chr2	2514798	2517448	-
AT2TE11435	Chr2	2523630	2527699	-
AT2TE11445	Chr2	2529074	2535262	-
AT2G06265	Chr2	2529780	2530255	-
AT2G06420	Chr2	2538743	2540365	+
AT2TE11535	Chr2	2561714	2562665	-
AT2TE11540	Chr2	2562809	2570724	-
AT2G06425	Chr2	2571928	2572743	-
AT2TE11545	Chr2	2572619	2573466	-
AT2G06500	Chr2	2580718	2583223	-
AT2TE11665	Chr2	2593734	2596529	-
AT2G06541	Chr2	2598222	2600326	-
AT2TE11755	Chr2	2618648	2618894	-
AT2TE11760	Chr2	2619115	2620320	-
AT2G06565	Chr2	2621756	2622063	+
AT2TE11765	Chr2	2622153	2623982	+
AT2G06570	Chr2	2622603	2624902	-
AT2TE11770	Chr2	2625098	2627990	+
AT2TE11805	Chr2	2632429	2635807	+
AT2TE11815	Chr2	2638831	2648149	+
AT2G06645	Chr2	2647991	2649647	-
AT2TE11820	Chr2	2649166	2652057	+
AT2TE11890	Chr2	2660935	2664200	+
AT2TE11900	Chr2	2666854	2678073	+
AT2TE11920	Chr2	2678104	2681641	-
AT2TE11925	Chr2	2681641	2685670	-
AT2TE11930	Chr2	2685673	2688359	+
AT2TE11960	Chr2	2693147	2695069	-
AT2TE11965	Chr2	2695532	2696018	+
AT2TE11985	Chr2	2699308	2709964	-
AT2TE11990	Chr2	2699623	2700772	+
AT2G06675	Chr2	2705042	2705476	-
AT2TE12020	Chr2	2707344	2708993	-
AT2TE12025	Chr2	2709964	2712861	-
AT2TE12030	Chr2	2712872	2720794	+
AT2TE12035	Chr2	2720794	2721275	-
AT2TE12040	Chr2	2721275	2722904	-
AT2TE12050	Chr2	2722956	2723974	-
AT2TE12060	Chr2	2724611	2727590	-
AT2TE12115	Chr2	2739758	2743696	-
AT2TE12135	Chr2	2745201	2745604	-
AT2TE12140	Chr2	2745604	2752270	+
AT2TE12160	Chr2	2752273	2752643	-
AT2G06845	Chr2	2753443	2756008	+
AT2TE12225	Chr2	2765877	2779424	-
AT2TE12230	Chr2	2771095	2773118	+
AT2TE12270	Chr2	2782037	2785706	+
AT2TE12285	Chr2	2786397	2788004	-
AT2TE12290	Chr2	2788392	2789106	+
AT2TE12300	Chr2	2790800	2791609	+
AT2TE12310	Chr2	2791701	2800659	+
AT2TE12315	Chr2	2793395	2799755	+
AT2TE12320	Chr2	2800664	2804388	+
AT2TE12335	Chr2	2805778	2806532	+
AT2G06904	Chr2	2806625	2807368	+
AT2G06906	Chr2	2807415	2807967	-
AT2TE12340	Chr2	2808059	2808835	-
AT2TE12350	Chr2	2811679	2813114	-
AT2TE12355	Chr2	2813114	2813640	+
AT2TE12360	Chr2	2813640	2814137	-
AT2G06908	Chr2	2815398	2816349	+
AT2TE12370	Chr2	2815405	2815727	-
AT2TE12375	Chr2	2815729	2817935	+
AT2TE12425	Chr2	2827403	2831332	+
AT2TE12430	Chr2	2829968	2830453	+
AT2TE12435	Chr2	2832362	2833661	+
AT2TE12445	Chr2	2836957	2838292	+
AT2TE12470	Chr2	2844764	2849743	-
AT2TE12505	Chr2	2855655	2857328	-
AT2TE12555	Chr2	2871822	2882410	-
AT2TE12570	Chr2	2884701	2885448	+
AT2TE12580	Chr2	2886318	2886880	-
AT2TE12610	Chr2	2890060	2890406	+
AT2G07020	Chr2	2908473	2911198	-
AT2TE12710	Chr2	2913723	2914572	+
AT2TE12810	Chr2	2932276	2934860	-
AT2TE12815	Chr2	2935656	2938180	+
AT2TE12825	Chr2	2941106	2945799	-
AT2G07110	Chr2	2952610	2953208	-
AT2TE12960	Chr2	2971055	2973440	+
AT2G07215	Chr2	2996776	2997889	-
AT2TE13080	Chr2	3000612	3005283	+
AT2G07240	Chr2	3007102	3012333	-
AT2TE13105	Chr2	3007108	3008067	+
AT2TE13115	Chr2	3010236	3012123	+
AT2TE13170	Chr2	3024723	3025684	-
AT2G07280	Chr2	3026398	3029353	+
AT2TE13200	Chr2	3030627	3031810	-
AT2TE13215	Chr2	3036101	3036399	-
AT2TE13245	Chr2	3041987	3044868	-
AT2TE13325	Chr2	3059457	3060803	-
AT2TE13335	Chr2	3061228	3074307	+
AT2TE13350	Chr2	3075734	3078570	-
AT2TE13360	Chr2	3078570	3079248	-
AT2TE13380	Chr2	3079511	3083903	-
AT2TE13385	Chr2	3083903	3089468	-
AT2G07440	Chr2	3093821	3094750	-
AT2TE13440	Chr2	3098016	3107253	+
AT2TE13445	Chr2	3107314	3112019	-
AT2TE13450	Chr2	3109368	3109641	-
AT2TE13515	Chr2	3121017	3121461	+
AT2TE13520	Chr2	3121464	3131230	+
AT2G07505	Chr2	3125671	3126173	+
AT2TE13580	Chr2	3141716	3142440	+
AT2TE13585	Chr2	3143092	3144613	-
AT2TE13590	Chr2	3144621	3145310	+
AT2TE13595	Chr2	3145310	3147937	+
AT2TE13620	Chr2	3150541	3151571	-
AT2TE13625	Chr2	3151571	3151970	-
AT2TE13635	Chr2	3152157	3154869	-
AT2TE13640	Chr2	3152708	3153049	-
AT2TE13645	Chr2	3154927	3155520	-
AT2TE13660	Chr2	3156897	3157395	-
AT2TE13685	Chr2	3160552	3166309	-
AT2TE13735	Chr2	3175489	3178727	+
AT2TE13740	Chr2	3179543	3180168	+
AT2TE13750	Chr2	3180825	3183686	-
AT2TE13755	Chr2	3183721	3186659	+
AT2TE13830	Chr2	3200475	3201138	-
AT2TE13840	Chr2	3203107	3203705	-
AT2TE13850	Chr2	3203756	3205871	-
AT2TE13870	Chr2	3209190	3211000	-
AT2TE13925	Chr2	3215634	3216758	+
AT2TE13950	Chr2	3222765	3233780	-
AT2TE13955	Chr2	3225682	3230917	-
AT2TE13970	Chr2	3234485	3237360	-
AT2TE15400	Chr2	3531974	3532287	-
AT2TE15410	Chr2	3533105	3533345	+
AT2TE15425	Chr2	3539390	3540227	-
AT2TE15440	Chr2	3541818	3545190	+
AT2TE15450	Chr2	3545245	3545748	+
AT2TE15460	Chr2	3545791	3546062	+
AT2TE15470	Chr2	3546592	3546828	-
AT2TE15490	Chr2	3547953	3552491	-
AT2TE15495	Chr2	3552888	3554461	-
AT2TE15510	Chr2	3556317	3558079	+
AT2TE15525	Chr2	3559719	3561359	-
AT2TE15530	Chr2	3560647	3560883	-
AT2TE15565	Chr2	3566076	3571742	-
AT2TE15570	Chr2	3570253	3570527	-
AT2G07750	Chr2	3576465	3580525	+
AT2G07760	Chr2	3584420	3586278	-
AT2TE15655	Chr2	3586372	3594041	-
AT2G07800	Chr2	3589410	3590008	-
AT2G07810	Chr2	3593730	3594072	+
AT2TE15660	Chr2	3595722	3597855	-
AT2TE15675	Chr2	3600150	3601950	-
AT2TE15690	Chr2	3603123	3603728	-
AT2TE15695	Chr2	3604312	3605677	+
AT2G07981	Chr2	3614986	3617716	+
AT2G08986	Chr2	3618058	3626460	+
AT2TE15880	Chr2	3636369	3645326	-
AT2G09388	Chr2	3651156	3652235	+
AT2TE15920	Chr2	3652585	3655719	-
AT2TE15925	Chr2	3655719	3658240	-
AT2TE15930	Chr2	3658241	3659011	+
AT2TE15995	Chr2	3676269	3680275	-
AT2TE16000	Chr2	3676755	3678366	+
AT2TE16010	Chr2	3681190	3684152	-
AT2TE16015	Chr2	3684248	3684831	-
AT2TE16030	Chr2	3687123	3692178	-
AT2G09840	Chr2	3704577	3705594	-
AT2TE16090	Chr2	3705806	3706431	-
AT2TE16100	Chr2	3708959	3710191	-
AT2TE16105	Chr2	3710192	3710982	+
AT2TE16130	Chr2	3716820	3717400	+
AT2TE16155	Chr2	3722140	3722410	+
AT2TE16160	Chr2	3722410	3725767	-
AT2TE16180	Chr2	3728861	3731260	-
AT2TE16190	Chr2	3731280	3740503	+
AT2TE16195	Chr2	3737022	3737657	+
AT2TE16215	Chr2	3740943	3742095	-
AT2TE16230	Chr2	3750177	3766283	-
AT2TE16235	Chr2	3752535	3763203	-
AT2TE16245	Chr2	3766283	3766910	-
AT2TE16255	Chr2	3767233	3770915	-
AT2TE16310	Chr2	3785519	3794054	-
AT2TE16365	Chr2	3804225	3808133	-
AT2TE16385	Chr2	3808136	3809217	-
AT2TE16390	Chr2	3809217	3812552	-
AT2TE16395	Chr2	3813106	3813813	-
AT2TE16400	Chr2	3813824	3815597	-
AT2TE16405	Chr2	3815597	3815918	-
AT2TE16415	Chr2	3816061	3817016	-
AT2TE16420	Chr2	3817016	3818989	-
AT2TE16425	Chr2	3818989	3819690	-
AT2TE16440	Chr2	3820574	3821095	-
AT2TE16445	Chr2	3821227	3823532	-
AT2TE16450	Chr2	3823543	3823797	-
AT2TE16465	Chr2	3825613	3826213	+
AT2TE16470	Chr2	3826213	3827838	+
AT2TE16475	Chr2	3827838	3832085	+
AT2TE16485	Chr2	3832852	3835797	-
AT2TE16490	Chr2	3832864	3833932	-
AT2TE16500	Chr2	3836125	3837892	-
AT2TE16505	Chr2	3837023	3837880	-
AT2TE16510	Chr2	3837880	3842825	+
AT2TE16520	Chr2	3842886	3843441	-
AT2TE16525	Chr2	3844437	3845315	+
AT2TE16530	Chr2	3845315	3852606	-
AT2TE16540	Chr2	3854065	3854811	-
AT2TE16545	Chr2	3854811	3858388	-
AT2TE16550	Chr2	3858388	3859010	-
AT2TE16555	Chr2	3859010	3859318	-
AT2TE16560	Chr2	3859318	3862946	-
AT2TE16565	Chr2	3862946	3863316	-
AT2TE16570	Chr2	3863316	3865228	-
AT2TE16575	Chr2	3865228	3875676	-
AT2TE16580	Chr2	3875678	3879089	-
AT2TE16585	Chr2	3876711	3878306	-
AT2TE16595	Chr2	3879089	3882525	-
AT2TE16600	Chr2	3882537	3884137	-
AT2TE16605	Chr2	3884138	3888503	-
AT2TE16610	Chr2	3888503	3888839	+
AT2TE16615	Chr2	3889208	3890270	+
AT2TE16620	Chr2	3890270	3895938	-
AT2TE16625	Chr2	3895938	3896689	-
AT2TE16635	Chr2	3898038	3900548	+
AT2TE16645	Chr2	3900548	3902230	-
AT2TE16650	Chr2	3902686	3903643	+
AT2TE16660	Chr2	3903683	3913850	+
AT2TE16665	Chr2	3906168	3907788	-
AT2TE16695	Chr2	3914161	3916406	+
AT2TE16700	Chr2	3916406	3916678	+
AT2TE16705	Chr2	3916678	3919159	+
AT2TE16710	Chr2	3919161	3922206	+
AT2TE16715	Chr2	3922206	3922448	+
AT2TE16725	Chr2	3922474	3925831	+
AT2TE16740	Chr2	3928136	3928727	+
AT2G10260	Chr2	3938527	3941240	+
AT2TE16800	Chr2	3942750	3962834	-
AT2TE16815	Chr2	3946037	3948281	+
AT2TE16820	Chr2	3948281	3949277	+
AT2TE16825	Chr2	3949277	3956452	+
AT2TE16830	Chr2	3956455	3956852	+
AT2TE16835	Chr2	3956852	3959397	+
AT2TE16845	Chr2	3962834	3963502	+
AT2TE16850	Chr2	3963519	3965120	-
AT2TE16860	Chr2	3965156	3966273	-
AT2TE16880	Chr2	3972367	3972831	-
AT2TE16885	Chr2	3973249	3975620	+
AT2TE16895	Chr2	3977963	3980063	-
AT2TE16900	Chr2	3980063	3980996	-
AT2TE16910	Chr2	3981129	3984836	-
AT2TE16915	Chr2	3982323	3983352	+
AT2TE16930	Chr2	3986484	4005114	-
AT2TE16955	Chr2	4007516	4008741	+
AT2G10440	Chr2	4013752	4018046	-
AT2TE17110	Chr2	4035771	4044425	+
AT2TE17115	Chr2	4045795	4047602	-
AT2TE17145	Chr2	4050151	4059366	+
AT2TE17155	Chr2	4056000	4057620	-
AT2TE17165	Chr2	4061045	4065458	+
AT2TE17205	Chr2	4071510	4074675	-
AT2G10545	Chr2	4089648	4090671	+
AT2TE17305	Chr2	4091289	4093895	-
AT2G10550	Chr2	4096001	4096920	-
AT2G10560	Chr2	4109862	4110698	-
AT2TE17380	Chr2	4110946	4115695	+
AT2TE17390	Chr2	4116032	4120742	+
AT2TE17405	Chr2	4122247	4126434	-
AT2TE17410	Chr2	4125560	4125807	-
AT2TE17420	Chr2	4126641	4129340	-
AT2TE17425	Chr2	4130633	4132419	-
AT2TE17430	Chr2	4132446	4134061	-
AT2TE17440	Chr2	4134107	4134696	+
AT2TE17450	Chr2	4134730	4135422	-
AT2G10602	Chr2	4134895	4135888	+
AT2TE17455	Chr2	4135422	4137080	+
AT2TE17485	Chr2	4137500	4139254	-
AT2TE17565	Chr2	4149395	4153427	-
AT2TE17570	Chr2	4153427	4155437	+
AT2TE17580	Chr2	4155665	4157504	+
AT2TE17585	Chr2	4157507	4159309	+
AT2TE17590	Chr2	4159309	4161049	-
AT2TE17595	Chr2	4161050	4162304	-
AT2TE17600	Chr2	4162310	4169555	+
AT2TE17610	Chr2	4170811	4173975	-
AT2TE17620	Chr2	4174051	4175324	-
AT2TE17625	Chr2	4175504	4183067	+
AT2TE17635	Chr2	4183150	4183673	-
AT2TE17640	Chr2	4183673	4184976	+
AT2TE17645	Chr2	4184976	4185220	+
AT2TE17650	Chr2	4185504	4185811	+
AT2TE17655	Chr2	4186049	4188832	-
AT2TE17660	Chr2	4186080	4188815	-
AT2TE17665	Chr2	4188832	4189612	-
AT2TE17675	Chr2	4189730	4190374	-
AT2TE17695	Chr2	4190637	4194323	-
AT2TE17705	Chr2	4194442	4194762	-
AT2TE17710	Chr2	4194768	4195205	+
AT2TE17725	Chr2	4197159	4211222	-
AT2G10615	Chr2	4228157	4229987	+
AT2TE17870	Chr2	4230742	4236512	+
AT2TE17875	Chr2	4236656	4244403	+
AT2TE17920	Chr2	4252038	4252659	+
AT2TE17925	Chr2	4252664	4255848	-
AT2TE17935	Chr2	4256383	4261370	+
AT2TE17985	Chr2	4275616	4282081	-
AT2TE18000	Chr2	4283215	4283925	+
AT2TE18005	Chr2	4283925	4287689	-
AT2TE18010	Chr2	4287689	4288452	-
AT2TE18025	Chr2	4294012	4294325	+
AT2TE18155	Chr2	4318005	4322177	-
AT2G10965	Chr2	4323671	4324948	+
AT2TE18245	Chr2	4338179	4339187	+
AT2G11010	Chr2	4361869	4365919	+
AT2G11015	Chr2	4366200	4366640	+
AT2TE18375	Chr2	4366862	4370201	-
AT2TE18395	Chr2	4375498	4379828	+
AT2TE18400	Chr2	4379828	4381342	+
AT2TE18410	Chr2	4381395	4397150	+
AT2TE18415	Chr2	4385855	4394311	-
AT2G11025	Chr2	4393772	4394045	-
AT2TE18430	Chr2	4397872	4398152	+
AT2TE18435	Chr2	4398156	4401873	+
AT2TE18440	Chr2	4398317	4400056	-
AT2TE18450	Chr2	4404336	4407935	-
AT2TE18455	Chr2	4407945	4412568	-
AT2TE18460	Chr2	4412568	4413203	-
AT2TE18465	Chr2	4413204	4413639	-
AT2TE18480	Chr2	4413829	4414616	+
AT2TE18620	Chr2	4434653	4434901	+
AT2TE18625	Chr2	4434901	4438078	+
AT2TE18665	Chr2	4442068	4445835	+
AT2TE18695	Chr2	4452529	4457022	+
AT2TE18710	Chr2	4460098	4470368	+
AT2TE18715	Chr2	4461785	4465949	+
AT2TE18720	Chr2	4465949	4468547	+
AT2TE18825	Chr2	4489280	4490650	+
AT2TE18830	Chr2	4490650	4500765	-
AT2TE18840	Chr2	4500830	4502203	+
AT2TE18845	Chr2	4502203	4502711	+
AT2TE18850	Chr2	4503120	4503980	+
AT2TE18860	Chr2	4504053	4505918	-
AT2TE18865	Chr2	4505918	4506990	+
AT2TE18870	Chr2	4507048	4507592	+
AT2TE18875	Chr2	4508416	4513686	+
AT2TE18880	Chr2	4511481	4512019	-
AT2TE18885	Chr2	4513697	4517287	-
AT2TE18890	Chr2	4517287	4518080	-
AT2TE18920	Chr2	4525971	4535960	+
AT2G11405	Chr2	4543175	4543522	+
AT2TE18980	Chr2	4558525	4566131	-
AT2TE18985	Chr2	4566141	4566581	+
AT2TE19005	Chr2	4570280	4583000	-
AT2TE19020	Chr2	4584958	4585887	-
AT2TE19025	Chr2	4585887	4589538	+
AT2G11462	Chr2	4589735	4590378	-
AT2TE19045	Chr2	4593320	4593530	-
AT2TE19055	Chr2	4593646	4598857	-
AT2TE19060	Chr2	4595628	4595985	-
AT2TE19065	Chr2	4595985	4597826	+
AT2TE19070	Chr2	4598864	4609295	-
AT2TE19075	Chr2	4604976	4607996	+
AT2TE19085	Chr2	4609334	4609541	-
AT2TE19105	Chr2	4610348	4610646	-
AT2TE19110	Chr2	4610646	4615454	-
AT2TE19115	Chr2	4615454	4615799	-
AT2TE19175	Chr2	4624741	4626159	+
AT2TE19200	Chr2	4626895	4631843	-
AT2TE19205	Chr2	4631843	4632056	-
AT2TE19215	Chr2	4632087	4632467	-
AT2G11570	Chr2	4634251	4635203	-
AT2TE19240	Chr2	4635951	4641165	-
AT2TE19245	Chr2	4641165	4641378	-
AT2TE19250	Chr2	4641378	4641900	-
AT2TE19270	Chr2	4643911	4644256	-
AT2TE19275	Chr2	4644471	4645636	+
AT2TE19350	Chr2	4654348	4654557	+
AT2G11620	Chr2	4658445	4660777	+
AT2G11623	Chr2	4660870	4661415	-
AT2G11626	Chr2	4661458	4662451	+
AT2TE19400	Chr2	4668851	4675676	+
AT2TE19405	Chr2	4669613	4670260	+
AT2TE19420	Chr2	4674291	4675499	+
AT2TE19430	Chr2	4675710	4676312	-
AT2TE19435	Chr2	4676312	4677891	-
AT2TE19440	Chr2	4678231	4678488	-
AT2TE19445	Chr2	4678488	4683298	-
AT2TE19460	Chr2	4683300	4683936	-
AT2TE19465	Chr2	4683936	4684618	+
AT2TE19475	Chr2	4684652	4687069	+
AT2TE19480	Chr2	4687069	4687423	+
AT2TE19485	Chr2	4687423	4689870	+
AT2TE19495	Chr2	4689870	4690772	-
AT2TE19500	Chr2	4690776	4691253	+
AT2TE19505	Chr2	4691253	4693499	-
AT2TE19510	Chr2	4693499	4693801	+
AT2TE19515	Chr2	4693801	4694973	+
AT2TE19520	Chr2	4694973	4695200	+
AT2TE19530	Chr2	4695259	4695877	+
AT2TE19535	Chr2	4695877	4699577	+
AT2TE19540	Chr2	4699596	4704005	-
AT2TE19555	Chr2	4702800	4706947	+
AT2TE19560	Chr2	4706947	4707147	+
AT2TE19565	Chr2	4707147	4709667	-
AT2TE19575	Chr2	4709689	4713536	+
AT2TE19585	Chr2	4714827	4715984	+
AT2TE19590	Chr2	4715984	4723844	+
AT2TE19595	Chr2	4724592	4725018	-
AT2TE19600	Chr2	4725034	4726100	-
AT2TE19610	Chr2	4728861	4729352	+
AT2TE19615	Chr2	4729403	4737545	-
AT2TE19625	Chr2	4731232	4732460	+
AT2TE19650	Chr2	4737699	4738951	-
AT2TE19660	Chr2	4739610	4741325	-
AT2TE19845	Chr2	4775629	4777898	-
AT2TE19850	Chr2	4777901	4781421	-
AT2TE19855	Chr2	4781421	4783565	-
AT2TE19860	Chr2	4783568	4784809	-
AT2TE19875	Chr2	4788437	4788812	-
AT2TE19970	Chr2	4812328	4815931	-
AT2TE19980	Chr2	4815991	4816497	-
AT2TE19985	Chr2	4816910	4818664	-
AT2TE19995	Chr2	4818884	4822043	+
AT2TE20000	Chr2	4822592	4823694	+
AT2TE20005	Chr2	4823783	4824037	+
AT2TE20010	Chr2	4824787	4826159	+
AT2TE20015	Chr2	4826396	4827613	-
AT2TE20020	Chr2	4827632	4829199	+
AT2TE20060	Chr2	4836555	4838296	+
AT2TE20065	Chr2	4837147	4837888	-
AT2TE20075	Chr2	4838481	4848343	+
AT2TE20085	Chr2	4848498	4850618	-
AT2TE20095	Chr2	4850642	4852159	-
AT2TE20100	Chr2	4852159	4852583	+
AT2TE20105	Chr2	4852583	4856562	+
AT2TE20110	Chr2	4853655	4855287	+
AT2TE20135	Chr2	4859812	4860670	+
AT2TE20160	Chr2	4873129	4888043	-
AT2TE20185	Chr2	4895390	4895814	-
AT2TE20190	Chr2	4896051	4897744	-
AT2G12200	Chr2	4900613	4900944	+
AT2TE20205	Chr2	4900802	4909281	+
AT2G12205	Chr2	4901120	4901343	+
AT2TE20220	Chr2	4910285	4919074	-
AT2TE20230	Chr2	4919735	4920396	-
AT2G12290	Chr2	4924100	4924501	-
AT2TE20255	Chr2	4925170	4933931	-
AT2TE20265	Chr2	4937269	4937528	+
AT2TE20330	Chr2	4948690	4959161	+
AT2TE20335	Chr2	4959497	4959918	-
AT2TE20365	Chr2	4964251	4964512	-
AT2TE20395	Chr2	4967927	4969477	-
AT2TE20405	Chr2	4970346	4970547	-
AT2TE20420	Chr2	4973336	4978133	-
AT2TE20435	Chr2	4978468	4990075	+
AT2TE20440	Chr2	4990077	4991751	+
AT2TE20445	Chr2	4991762	4993953	-
AT2TE20450	Chr2	4993954	4995953	+
AT2TE20455	Chr2	4996263	4996578	+
AT2TE20480	Chr2	4997479	5001923	+
AT2TE20555	Chr2	5011915	5012225	+
AT2TE20560	Chr2	5012419	5012680	+
AT2TE20575	Chr2	5013128	5013339	-
AT2TE20590	Chr2	5013821	5015200	-
AT2TE20645	Chr2	5024024	5026526	-
AT2TE20650	Chr2	5026831	5028640	-
AT2TE20665	Chr2	5029104	5029940	+
AT2TE20675	Chr2	5030654	5030857	-
AT2TE20680	Chr2	5031468	5032435	-
AT2TE20685	Chr2	5032580	5033778	+
AT2TE20690	Chr2	5035092	5035395	+
AT2TE20695	Chr2	5036235	5036602	+
AT2TE20705	Chr2	5037054	5037564	-
AT2TE20720	Chr2	5038421	5038925	+
AT2TE20735	Chr2	5040994	5048412	+
AT2TE20815	Chr2	5060428	5062129	-
AT2TE20835	Chr2	5062543	5067149	-
AT2TE20840	Chr2	5067149	5067411	-
AT2TE20895	Chr2	5082815	5083204	+
AT2TE20905	Chr2	5084963	5090182	+
AT2TE20925	Chr2	5090852	5091911	+
AT2TE20935	Chr2	5091981	5092512	+
AT2TE20940	Chr2	5092512	5097934	+
AT2TE20945	Chr2	5095494	5097553	-
AT2TE20960	Chr2	5100092	5111544	+
AT2TE20965	Chr2	5105900	5110242	+
AT2TE21020	Chr2	5122698	5123402	+
AT2TE21025	Chr2	5123402	5127170	-
AT2TE21030	Chr2	5127170	5127954	-
AT2TE21035	Chr2	5127478	5127696	-
AT2TE21045	Chr2	5127954	5132346	-
AT2TE21050	Chr2	5132375	5133590	+
AT2TE21055	Chr2	5133953	5140757	+
AT2TE21060	Chr2	5138593	5139791	+
AT2TE21065	Chr2	5140759	5145643	+
AT2TE21075	Chr2	5142058	5142292	+
AT2TE21080	Chr2	5142292	5142775	+
AT2TE21090	Chr2	5145643	5146995	+
AT2TE21100	Chr2	5147259	5148282	+
AT2TE21105	Chr2	5148282	5153752	+
AT2TE21110	Chr2	5149571	5151199	+
AT2TE21125	Chr2	5154629	5158660	-
AT2TE21220	Chr2	5173569	5173789	+
AT2TE21225	Chr2	5173789	5176138	+
AT2TE21235	Chr2	5176230	5176698	+
AT2TE21265	Chr2	5182765	5185651	+
AT2TE21295	Chr2	5190751	5213747	-
AT2TE21335	Chr2	5218774	5218996	-
AT2TE21340	Chr2	5219463	5219816	-
AT2TE21345	Chr2	5220789	5227189	-
AT2TE21350	Chr2	5227189	5228123	-
AT2TE21355	Chr2	5228124	5229155	-
AT2TE21360	Chr2	5229155	5237978	-
AT2TE21380	Chr2	5239616	5245609	-
AT2TE21400	Chr2	5249271	5249547	+
AT2TE21410	Chr2	5249723	5250077	-
AT2TE21415	Chr2	5250079	5250332	+
AT2TE21420	Chr2	5250332	5253680	+
AT2TE21440	Chr2	5253784	5258058	+
AT2TE21445	Chr2	5258059	5259426	+
AT2TE21450	Chr2	5259431	5262437	+
AT2TE21455	Chr2	5262444	5264751	+
AT2TE21460	Chr2	5263613	5264260	+
AT2TE21470	Chr2	5264792	5265237	+
AT2TE21475	Chr2	5265238	5266185	+
AT2TE21480	Chr2	5266199	5269203	+
AT2TE21485	Chr2	5269209	5271410	+
AT2TE21500	Chr2	5271517	5271962	+
AT2TE21505	Chr2	5271962	5275944	+
AT2TE21530	Chr2	5280409	5289362	-
AT2TE21535	Chr2	5282587	5284512	-
AT2TE21545	Chr2	5284601	5285513	-
AT2TE21555	Chr2	5285585	5286908	-
AT2G12875	Chr2	5289411	5291470	-
AT2TE21605	Chr2	5297230	5306835	-
AT2TE21610	Chr2	5306843	5312863	+
AT2TE21660	Chr2	5322761	5323132	+
AT2G12945	Chr2	5322903	5323624	-
AT2TE21670	Chr2	5325566	5326737	-
AT2TE21680	Chr2	5327069	5329572	+
AT2TE21695	Chr2	5329577	5330194	+
AT2TE21700	Chr2	5330886	5331407	+
AT2TE21705	Chr2	5331407	5337817	+
AT2TE21710	Chr2	5338032	5346285	-
AT2TE21715	Chr2	5346374	5347126	+
AT2TE21730	Chr2	5348588	5353710	-
AT2TE21745	Chr2	5353713	5362152	-
AT2TE21750	Chr2	5362152	5365114	+
AT2TE21755	Chr2	5362753	5364364	-
AT2TE21760	Chr2	5365115	5381127	-
AT2TE21765	Chr2	5367814	5377537	-
AT2TE21790	Chr2	5381127	5381869	-
AT2TE21795	Chr2	5381891	5383073	-
AT2TE21805	Chr2	5383093	5385098	-
AT2TE21815	Chr2	5387018	5388592	+
AT2TE21820	Chr2	5388592	5388865	+
AT2TE21855	Chr2	5394709	5399649	+
AT2TE21915	Chr2	5412449	5413079	-
AT2TE21925	Chr2	5413238	5414854	-
AT2TE22065	Chr2	5448117	5453268	-
AT2TE22075	Chr2	5453327	5456816	-
AT2TE22105	Chr2	5457468	5457685	-
AT2TE22120	Chr2	5458994	5460170	-
AT2TE22170	Chr2	5468372	5469707	+
AT2TE22175	Chr2	5469707	5470723	-
AT2TE22180	Chr2	5470723	5471062	+
AT2TE22185	Chr2	5471062	5479129	+
AT2TE22190	Chr2	5473571	5474153	-
AT2TE22220	Chr2	5479205	5481678	+
AT2TE22230	Chr2	5481821	5483743	-
AT2TE22235	Chr2	5483743	5490467	-
AT2TE22245	Chr2	5491267	5496081	+
AT2TE22260	Chr2	5498815	5500511	+
AT2TE22315	Chr2	5517608	5520081	-
AT2TE22335	Chr2	5523653	5527606	-
AT2TE22345	Chr2	5528711	5534059	-
AT2TE22490	Chr2	5560011	5560608	+
AT2TE22495	Chr2	5560972	5565082	+
AT2TE22505	Chr2	5565095	5573068	+
AT2TE22510	Chr2	5573068	5573686	+
AT2TE22520	Chr2	5573728	5578989	+
AT2TE22635	Chr2	5600342	5605594	-
AT2TE22720	Chr2	5617511	5622394	-
AT2TE22725	Chr2	5623087	5627317	+
AT2G13500	Chr2	5627936	5629099	+
AT2G13510	Chr2	5630001	5631107	-
AT2TE22740	Chr2	5631378	5636319	-
AT2G13547	Chr2	5646602	5647423	+
AT2TE22855	Chr2	5657466	5657666	-
AT2TE22865	Chr2	5658120	5658566	-
AT2TE22905	Chr2	5668157	5669185	+
AT2TE23120	Chr2	5709608	5713343	-
AT2TE23130	Chr2	5713761	5714069	+
AT2G13720	Chr2	5724007	5725248	+
AT2TE23180	Chr2	5727402	5729656	+
AT2TE23185	Chr2	5729797	5732119	+
AT2TE23190	Chr2	5730677	5730908	+
AT2TE23510	Chr2	5780102	5786739	-
AT2TE23520	Chr2	5787732	5788146	-
AT2TE23545	Chr2	5792781	5797609	-
AT2TE23705	Chr2	5817334	5822205	+
AT2TE23745	Chr2	5827131	5827642	+
AT2TE23755	Chr2	5827896	5828564	-
AT2G13895	Chr2	5829485	5830283	+
AT2TE23845	Chr2	5846255	5851427	-
AT2TE23855	Chr2	5852698	5857428	+
AT2G13980	Chr2	5869853	5870368	-
AT2TE23940	Chr2	5876620	5882829	-
AT2TE23955	Chr2	5883767	5884068	-
AT2TE23970	Chr2	5886606	5888004	+
AT2TE24035	Chr2	5900867	5904548	-
AT2TE24245	Chr2	5944594	5945744	+
AT2TE24250	Chr2	5944942	5945391	+
AT2TE24390	Chr2	5996552	5997248	-
AT2TE24400	Chr2	5997520	5998051	+
AT2TE24410	Chr2	5999322	6001312	-
AT2TE24435	Chr2	6006490	6007031	+
AT2TE24445	Chr2	6007256	6008495	-
AT2TE24450	Chr2	6008495	6009479	+
AT2TE24460	Chr2	6009673	6012673	-
AT2G14270	Chr2	6045579	6046045	+
AT2G14288	Chr2	6056038	6056778	-
AT2TE24735	Chr2	6070845	6082356	+
AT2TE24800	Chr2	6095106	6096975	+
AT2TE24850	Chr2	6105583	6108510	-
AT2TE24860	Chr2	6110679	6113207	+
AT2G14390	Chr2	6110912	6111918	+
AT2TE24865	Chr2	6114125	6114806	+
AT2TE24870	Chr2	6115220	6115787	+
AT2TE24880	Chr2	6115891	6119142	+
AT2G14395	Chr2	6119467	6120748	+
AT2TE24900	Chr2	6123502	6123748	+
AT2TE24905	Chr2	6124737	6126659	+
AT2TE24910	Chr2	6126675	6127148	-
AT2TE24915	Chr2	6127148	6127656	-
AT2TE24920	Chr2	6127656	6128607	-
AT2TE24950	Chr2	6133921	6134198	+
AT2TE24955	Chr2	6134198	6136291	+
AT2TE24960	Chr2	6136291	6139070	+
AT2TE25020	Chr2	6148549	6162030	+
AT2TE25185	Chr2	6193444	6194223	+
AT2TE25190	Chr2	6194228	6194954	+
AT2TE25355	Chr2	6221710	6222806	-
AT2TE25360	Chr2	6221751	6222788	-
AT2TE25365	Chr2	6222998	6223380	-
AT2TE25395	Chr2	6228479	6229325	+
AT2TE25400	Chr2	6229356	6232388	+
AT2TE25410	Chr2	6232726	6233577	+
AT2TE25490	Chr2	6251318	6253755	+
AT2TE25495	Chr2	6252017	6252965	-
AT2TE25515	Chr2	6258401	6259080	+
AT2TE25520	Chr2	6259434	6260598	+
AT2TE25525	Chr2	6261349	6262119	+
AT2TE25685	Chr2	6296046	6296271	+
AT2G14755	Chr2	6316744	6317587	-
AT2TE25840	Chr2	6329640	6344951	-
AT2TE25865	Chr2	6349168	6349584	-
AT2TE25875	Chr2	6351158	6353252	-
AT2TE26230	Chr2	6422229	6427295	-
AT2TE26275	Chr2	6433986	6439754	+
AT2G14945	Chr2	6438504	6439144	-
AT2TE26315	Chr2	6446777	6450277	+
AT2TE26360	Chr2	6457601	6458064	-
AT2TE26370	Chr2	6458141	6459905	-
AT2TE26380	Chr2	6459946	6465695	-
AT2TE26455	Chr2	6472185	6472407	+
AT2TE26470	Chr2	6476069	6478710	+
AT2TE26480	Chr2	6479100	6479413	+
AT2TE26610	Chr2	6508852	6510920	+
AT2TE26780	Chr2	6549283	6550507	+
AT2TE26785	Chr2	6550566	6554398	+
AT2TE26800	Chr2	6554398	6554796	+
AT2G15110	Chr2	6554847	6557168	-
AT2TE26875	Chr2	6579573	6581820	-
AT2G15180	Chr2	6588743	6590167	-
AT2TE26980	Chr2	6621210	6626425	-
AT2TE27390	Chr2	6700892	6706745	+
AT2TE27460	Chr2	6718378	6719933	+
AT2TE27465	Chr2	6719933	6723443	+
AT2TE27470	Chr2	6723443	6723766	+
AT2G15420	Chr2	6723948	6728183	-
AT2TE27480	Chr2	6726088	6726515	+
AT2TE27525	Chr2	6737879	6738178	-
AT2TE27645	Chr2	6766437	6772521	-
AT2TE27670	Chr2	6778861	6785573	-
AT2G15710	Chr2	6842648	6845103	+
AT2TE27880	Chr2	6845384	6848332	-
AT2TE28160	Chr2	6909754	6914586	-
AT2TE28260	Chr2	6935765	6940571	+
AT2TE28280	Chr2	6943115	6944022	+
AT2TE28325	Chr2	6953994	6958817	+
AT2TE28350	Chr2	6965359	6966168	+
AT2G16015	Chr2	6970352	6970851	+
AT2G16018	Chr2	6972222	6973705	-
AT2G16020	Chr2	6973356	6973586	+
AT2TE28485	Chr2	6994127	6994632	+
AT2TE28550	Chr2	7005163	7005375	-
AT2TE28555	Chr2	7006419	7007823	+
AT2TE28565	Chr2	7008406	7019922	+
AT2TE28955	Chr2	7113238	7120081	+
AT2G16490	Chr2	7146000	7147981	-
AT2G16676	Chr2	7230346	7232223	-
AT2TE29460	Chr2	7232310	7237513	-
AT2TE30550	Chr2	7448276	7448601	+
AT2TE30555	Chr2	7448761	7454292	-
AT2TE31555	Chr2	7659043	7660116	-
AT2TE32120	Chr2	7777248	7782175	+
AT2G17905	Chr2	7777279	7777805	+
AT2G17920	Chr2	7782712	7784287	+
AT2G18530	Chr2	8039670	8040780	+
AT2TE34410	Chr2	8269646	8274939	-
AT2TE35840	Chr2	8561843	8567009	-
AT2TE37050	Chr2	8816055	8820891	-
TEM2663	Chr2	8822075	8823292	+
AT2TE38900	Chr2	9187491	9191655	-
AT2TE38905	Chr2	9191655	9193725	-
AT2TE38910	Chr2	9193725	9195279	-
AT2TE40690	Chr2	9557862	9558213	-
AT2TE45205	Chr2	10534132	10534615	+
AT2TE45465	Chr2	10592184	10609120	+
AT2TE45520	Chr2	10623572	10623924	+
AT2TE45615	Chr2	10640086	10640559	-
AT2TE45655	Chr2	10649229	10649459	+
AT2TE46730	Chr2	10873584	10873914	-
AT2TE46755	Chr2	10877430	10878744	+
AT2TE47870	Chr2	11097899	11098540	-
AT2G26620	Chr2	11325069	11326835	-
AT2TE48990	Chr2	11327944	11328800	+
AT2G27380	Chr2	11713411	11715774	+
TEM2953	Chr2	12284791	12286500	+
AT2TE54360	Chr2	12449212	12454227	-
AT2TE54780	Chr2	12539440	12541817	-
AT2G29605	Chr2	12657909	12660087	-
AT2G29850	Chr2	12734725	12736394	+
AT2TE55770	Chr2	12755360	12755804	+
AT2TE58965	Chr2	13423408	13424721	-
AT2TE61845	Chr2	14008867	14009432	+
AT2TE63775	Chr2	14403963	14404394	+
AT2G36710	Chr2	15389466	15391257	-
TEM3087	Chr2	15410750	15411905	+
AT2G37125	Chr2	15596104	15596908	-
TEM3094	Chr2	15679821	15682123	+
AT2G38195	Chr2	16003615	16006654	+
AT2G40955	Chr2	17092669	17095132	+
AT2TE77005	Chr2	17092869	17093069	+
AT2TE77015	Chr2	17095129	17095512	+
AT2G41590	Chr2	17343360	17345005	+
TEM3221	Chr2	19697783	19698289	+
AT3TE00130	Chr3	28596	29097	-
AT3G01415	Chr3	156148	156937	-
AT3TE00665	Chr3	156732	156970	+
AT3TE06550	Chr3	1555419	1560680	-
TEM3278	Chr3	2430097	2430662	+
AT3TE11850	Chr3	2808421	2818893	+
AT3TE16035	Chr3	3807366	3812643	-
AT3TE16040	Chr3	3812753	3813101	+
AT3TE18040	Chr3	4276602	4288584	-
AT3TE18045	Chr3	4283614	4285728	-
TEM3334	Chr3	4454034	4456290	+
AT3G18340	Chr3	6294018	6295134	+
TEM3443	Chr3	7420245	7421059	+
AT3G22580	Chr3	8002762	8003145	-
AT3G22710	Chr3	8026202	8027274	-
AT3G22935	Chr3	8130391	8131130	+
AT3G22940	Chr3	8131468	8132706	+
AT3G23685	Chr3	8527239	8528317	+
AT3TE36835	Chr3	8789307	8791042	+
AT3TE38565	Chr3	9226632	9231377	+
AT3TE38595	Chr3	9236766	9240922	-
AT3G25719	Chr3	9379916	9380152	-
AT3TE39220	Chr3	9387866	9393251	+
AT3TE39395	Chr3	9434861	9438342	-
AT3TE39430	Chr3	9444590	9446673	-
AT3TE40730	Chr3	9784724	9784928	-
AT3TE40735	Chr3	9784928	9787388	-
AT3TE40980	Chr3	9841762	9842100	+
AT3TE41210	Chr3	9900777	9901141	-
AT3G27040	Chr3	9974768	9976390	-
AT3G27140	Chr3	10006891	10008174	-
AT3TE42075	Chr3	10106099	10111467	+
AT3G27600	Chr3	10223743	10224948	-
TEM3713	Chr3	10394730	10395922	+
AT3TE43550	Chr3	10477961	10483743	-
AT3TE43895	Chr3	10560072	10560431	+
AT3TE43900	Chr3	10560760	10561068	+
AT3TE43905	Chr3	10561603	10562083	+
AT3TE44210	Chr3	10635156	10638608	-
AT3G28550	Chr3	10700638	10704010	-
AT3TE45270	Chr3	10889154	10889410	-
AT3G28870	Chr3	10890355	10891839	+
AT3TE45385	Chr3	10917703	10922777	-
AT3TE45415	Chr3	10928288	10929021	-
AT3TE45430	Chr3	10930887	10932595	+
AT3TE45550	Chr3	10953343	10953862	-
AT3TE45800	Chr3	11016110	11020804	+
AT3TE46000	Chr3	11066660	11067771	-
AT3TE46245	Chr3	11116001	11120737	-
AT3TE46350	Chr3	11144340	11146916	-
AT3TE46480	Chr3	11171823	11172189	-
AT3TE46495	Chr3	11172430	11174181	-
AT3TE46570	Chr3	11187434	11187873	+
AT3TE46790	Chr3	11231600	11232569	+
AT3G29450	Chr3	11322669	11324582	+
AT3TE47220	Chr3	11324467	11327495	-
AT3TE47225	Chr3	11327495	11328616	+
AT3TE47235	Chr3	11335552	11341895	+
AT3TE47240	Chr3	11341928	11344898	-
AT3G29455	Chr3	11348729	11350267	+
AT3TE47275	Chr3	11352478	11354141	-
AT3TE47280	Chr3	11354325	11357862	+
AT3G29570	Chr3	11363806	11364789	-
AT3TE47335	Chr3	11366015	11366436	-
AT3TE47380	Chr3	11372642	11373123	+
AT3TE47410	Chr3	11378294	11378557	-
AT3TE47500	Chr3	11389554	11391889	+
AT3TE47505	Chr3	11392705	11393765	-
AT3TE47555	Chr3	11404272	11413061	+
AT3TE47560	Chr3	11406729	11408733	-
AT3TE47590	Chr3	11416492	11416838	+
AT3TE47595	Chr3	11416917	11424474	+
AT3TE47620	Chr3	11426513	11429270	+
AT3TE47625	Chr3	11429271	11430076	+
AT3TE47630	Chr3	11430076	11430662	-
AT3TE47645	Chr3	11432989	11434703	+
AT3TE47870	Chr3	11487924	11488553	+
AT3TE47880	Chr3	11491070	11493852	-
AT3TE47885	Chr3	11495074	11495662	+
AT3TE47905	Chr3	11498789	11499221	+
AT3TE47935	Chr3	11504517	11508368	+
AT3TE47945	Chr3	11508509	11508812	+
AT3TE47970	Chr3	11512956	11513763	+
AT3TE47975	Chr3	11513763	11521912	+
AT3TE47980	Chr3	11521912	11522534	+
AT3TE47985	Chr3	11523321	11524042	+
AT3TE48105	Chr3	11556514	11557383	-
AT3TE48110	Chr3	11558737	11560666	-
AT3TE48120	Chr3	11560701	11569513	-
AT3TE48135	Chr3	11570286	11575315	+
AT3TE48150	Chr3	11575521	11577530	+
AT3G29750	Chr3	11579125	11580600	-
AT3TE48170	Chr3	11582479	11585241	+
AT3G29763	Chr3	11593924	11595441	-
AT3G29765	Chr3	11595467	11597077	-
AT3TE48205	Chr3	11597404	11599821	-
AT3TE48230	Chr3	11606973	11608180	-
AT3TE48240	Chr3	11608270	11609297	-
AT3TE48250	Chr3	11609456	11609698	-
AT3TE48300	Chr3	11621948	11622911	+
AT3TE48305	Chr3	11622911	11623774	+
AT3TE48360	Chr3	11632855	11634011	+
AT3TE48410	Chr3	11644460	11644984	+
AT3TE48480	Chr3	11664968	11669787	+
AT3TE48500	Chr3	11674069	11674508	-
AT3TE48520	Chr3	11676240	11678189	+
AT3TE48530	Chr3	11678764	11679153	+
AT3TE48535	Chr3	11679153	11683564	+
AT3TE48540	Chr3	11683564	11689821	+
AT3TE48545	Chr3	11689822	11691134	+
AT3TE48555	Chr3	11691623	11692551	+
AT3G29790	Chr3	11693095	11693622	-
AT3TE48590	Chr3	11697283	11702259	+
AT3TE48645	Chr3	11705696	11706028	+
AT3TE48655	Chr3	11706455	11706785	+
AT3TE48665	Chr3	11706945	11707176	-
AT3TE48680	Chr3	11707703	11707932	-
AT3TE48695	Chr3	11708654	11708984	+
AT3TE48705	Chr3	11709178	11709417	-
AT3TE48710	Chr3	11709417	11709777	+
AT3TE48730	Chr3	11710694	11710923	-
AT3TE48860	Chr3	11733307	11734882	+
AT3TE49015	Chr3	11768779	11771929	-
AT3TE49020	Chr3	11771942	11772390	-
AT3TE49030	Chr3	11775582	11776116	-
AT3TE49035	Chr3	11778363	11778647	-
AT3TE49265	Chr3	11840593	11841374	+
AT3TE49275	Chr3	11842039	11844720	-
AT3TE49340	Chr3	11853140	11856592	+
AT3TE49420	Chr3	11869893	11870727	+
AT3TE49430	Chr3	11872720	11875280	+
AT3TE49445	Chr3	11875724	11876874	+
AT3G30220	Chr3	11877866	11878458	-
AT3G30222	Chr3	11878632	11878907	-
AT3G30230	Chr3	11879235	11881788	-
AT3G30235	Chr3	11882266	11883625	+
AT3TE49470	Chr3	11883805	11885981	+
AT3TE49670	Chr3	11928692	11929581	+
AT3G30320	Chr3	11931287	11934694	+
AT3TE49700	Chr3	11935635	11937294	-
AT3TE49710	Chr3	11937344	11937545	-
AT3TE49720	Chr3	11939165	11940170	-
AT3TE49725	Chr3	11940170	11945048	-
AT3TE49730	Chr3	11945048	11945531	-
AT3TE49825	Chr3	11964371	11965092	+
AT3G30370	Chr3	11965180	11965719	-
AT3TE49900	Chr3	11981227	11981687	+
AT3TE50025	Chr3	12000266	12007884	+
AT3TE50030	Chr3	12008196	12009443	-
AT3TE50035	Chr3	12009522	12009881	-
AT3TE50040	Chr3	12010014	12010442	-
AT3TE50045	Chr3	12011020	12011417	+
AT3TE50050	Chr3	12011433	12013213	-
AT3TE50060	Chr3	12012427	12012684	-
AT3TE50110	Chr3	12018828	12019174	+
AT3TE50120	Chr3	12019601	12024774	+
AT3TE50125	Chr3	12025063	12040032	-
AT3TE50130	Chr3	12033705	12039570	-
AT3TE50215	Chr3	12059078	12059749	+
AT3G30430	Chr3	12064952	12065296	+
AT3TE50255	Chr3	12066376	12067209	-
AT3TE50260	Chr3	12067210	12071283	-
AT3TE50265	Chr3	12071283	12073052	+
AT3TE50270	Chr3	12073052	12073600	+
AT3TE50305	Chr3	12092995	12093565	-
AT3TE50325	Chr3	12096079	12097283	-
AT3TE50335	Chr3	12097605	12098316	+
AT3TE50375	Chr3	12105505	12121576	-
AT3G30520	Chr3	12130340	12132173	+
AT3TE50550	Chr3	12170726	12174172	-
AT3TE50555	Chr3	12171589	12172283	+
AT3TE50560	Chr3	12172283	12173807	+
AT3TE50565	Chr3	12174172	12175453	-
AT3TE50570	Chr3	12175456	12187368	+
AT3TE50575	Chr3	12177801	12179450	+
AT3TE50595	Chr3	12187385	12191386	-
AT3TE50605	Chr3	12191851	12195746	-
AT3TE50610	Chr3	12195760	12201227	+
AT3TE50615	Chr3	12198115	12198987	+
AT3TE50630	Chr3	12202073	12209594	+
AT3TE50635	Chr3	12205947	12206230	+
AT3TE50650	Chr3	12209610	12211824	-
AT3TE50655	Chr3	12211824	12218034	-
AT3TE50670	Chr3	12222368	12225829	-
AT3TE50675	Chr3	12225829	12232749	-
AT3TE50760	Chr3	12243853	12255282	-
AT3TE50770	Chr3	12255573	12256494	-
AT3TE50775	Chr3	12256494	12259605	+
AT3TE50785	Chr3	12261098	12262262	+
AT3TE50830	Chr3	12273354	12273876	-
AT3TE50835	Chr3	12275146	12275503	+
AT3TE50840	Chr3	12275506	12275925	-
AT3TE50875	Chr3	12278894	12287842	-
AT3TE50880	Chr3	12285157	12286383	-
AT3TE50890	Chr3	12288028	12294708	+
AT3TE50895	Chr3	12294708	12295224	+
AT3TE50900	Chr3	12295224	12296058	+
AT3TE50905	Chr3	12296103	12297531	+
AT3TE50910	Chr3	12297531	12298224	+
AT3TE50940	Chr3	12302108	12308742	-
AT3TE50950	Chr3	12308993	12309884	-
AT3TE50955	Chr3	12309888	12311004	-
AT3TE50960	Chr3	12311261	12311802	-
AT3TE50970	Chr3	12312855	12314639	-
AT3TE50985	Chr3	12315069	12316854	+
AT3TE50990	Chr3	12317188	12317461	+
AT3TE51020	Chr3	12319862	12320237	-
AT3TE51025	Chr3	12320252	12321302	-
[truncated: 2,487 more rows]

## Sheet: intermediate_TEs
TE_ID	chromosome	start	end	direction
AT1TE00025	Chr1	17023	18924	+
AT1TE00030	Chr1	18330	18642	-
AT1TE00220	Chr1	76843	77500	+
TEM0009	Chr1	238116	239337	+
AT1TE00840	Chr1	257709	258629	-
TEM0012	Chr1	291837	292637	+
AT1TE01395	Chr1	431473	431916	-
AT1TE01405	Chr1	432994	433837	-
AT1TE01615	Chr1	499134	501371	-
AT1TE02465	Chr1	758534	760505	+
TEM0035	Chr1	958508	959289	+
AT1TE03900	Chr1	1194344	1195166	+
AT1TE04665	Chr1	1430437	1430836	+
AT1TE04710	Chr1	1441740	1442976	+
AT1TE04720	Chr1	1443561	1443971	+
TEM0045	Chr1	1445291	1446611	+
AT1TE05000	Chr1	1522770	1522971	-
TEM0050	Chr1	1598249	1598717	+
AT1TE05280	Chr1	1613271	1614662	-
TEM0052	Chr1	1617629	1618136	+
TEM0057	Chr1	1728657	1729301	+
AT1TE06470	Chr1	1975441	1976072	+
AT1TE06480	Chr1	1976109	1977174	-
AT1TE07050	Chr1	2157094	2157660	+
AT1TE07300	Chr1	2234388	2235176	-
AT1TE08055	Chr1	2473098	2473306	-
AT1TE08240	Chr1	2531450	2534781	-
AT1TE08420	Chr1	2587142	2588427	-
AT1TE09080	Chr1	2788429	2800701	+
AT1TE09700	Chr1	2986347	2986950	-
AT1TE09820	Chr1	3023385	3024890	-
TEM0078	Chr1	3063405	3063825	+
AT1TE09970	Chr1	3073226	3075036	-
AT1TE09975	Chr1	3073311	3073623	+
AT1G10190	Chr1	3343686	3345632	-
AT1TE11110	Chr1	3413548	3414889	+
AT1TE11535	Chr1	3547013	3547591	-
AT1TE12430	Chr1	3825780	3827697	-
AT1TE12675	Chr1	3897177	3898168	-
AT1G11593	Chr1	3898002	3898609	+
AT1TE13310	Chr1	4093293	4094494	-
AT1TE13365	Chr1	4110103	4111021	+
AT1TE13375	Chr1	4111110	4113062	+
AT1TE13690	Chr1	4209163	4209607	-
AT1TE14085	Chr1	4329876	4334393	+
AT1TE14315	Chr1	4405995	4411119	-
AT1TE15445	Chr1	4770059	4770663	-
AT1TE16080	Chr1	4966555	4967016	+
AT1G14800	Chr1	5099572	5102558	+
AT1TE17875	Chr1	5531284	5531953	+
AT1TE18290	Chr1	5657736	5657944	-
AT1TE18295	Chr1	5657944	5659382	-
AT1TE18370	Chr1	5679267	5681449	+
AT1TE18410	Chr1	5691739	5696671	+
TEM0149	Chr1	5699732	5702072	+
TEM0150	Chr1	5798740	5799534	+
AT1TE18955	Chr1	5862941	5863537	+
AT1TE19085	Chr1	5898933	5899206	+
AT1TE19090	Chr1	5899207	5899868	-
AT1TE19130	Chr1	5911724	5916535	+
AT1TE19270	Chr1	5958627	5959682	-
TEM0156	Chr1	5970452	5972331	+
TEM0157	Chr1	5974885	5975819	+
AT1TE19910	Chr1	6156400	6158864	-
AT1TE20090	Chr1	6211688	6211987	+
AT1TE20315	Chr1	6273522	6276128	-
AT1TE20410	Chr1	6302581	6303156	+
AT1TE20925	Chr1	6454676	6456015	+
AT1TE21130	Chr1	6514399	6515317	+
AT1TE21210	Chr1	6538418	6543539	+
AT1TE21310	Chr1	6574509	6575045	+
AT1TE21355	Chr1	6587128	6588246	-
AT1G19086	Chr1	6588542	6589338	+
AT1TE21360	Chr1	6589530	6589760	+
AT1G19090	Chr1	6589835	6592762	+
AT1TE21710	Chr1	6704196	6709404	+
AT1TE21805	Chr1	6742978	6744224	+
AT1TE21840	Chr1	6758934	6759700	+
TEM0197	Chr1	6905870	6906650	+
AT1TE22695	Chr1	7023545	7024535	+
AT1G20280	Chr1	7023682	7024439	+
AT1TE22750	Chr1	7035030	7037376	+
AT1TE23065	Chr1	7132353	7132972	-
AT1TE23420	Chr1	7254946	7257226	-
TEM0211	Chr1	7344291	7344565	+
AT1TE23740	Chr1	7352929	7365197	-
TEM0218	Chr1	7521892	7522647	+
AT1G21928	Chr1	7712211	7712513	-
AT1TE24850	Chr1	7714707	7722547	+
AT1TE24955	Chr1	7761200	7762110	-
AT1TE25615	Chr1	7960123	7961263	-
TEM0244	Chr1	8016405	8016631	+
AT1TE26120	Chr1	8114684	8116894	+
AT1TE26370	Chr1	8189828	8190549	+
TEM0255	Chr1	8204649	8205791	+
AT1TE26515	Chr1	8235851	8237517	+
AT1TE26535	Chr1	8238454	8239849	-
AT1TE26665	Chr1	8276494	8277489	-
AT1TE26675	Chr1	8277588	8279056	+
AT1TE26720	Chr1	8289870	8290484	+
AT1TE26735	Chr1	8290584	8292025	+
TEM0264	Chr1	8319570	8320564	+
AT1TE27100	Chr1	8392154	8392420	+
AT1TE27295	Chr1	8453485	8461797	+
AT1TE27345	Chr1	8475176	8475479	-
AT1TE27390	Chr1	8488222	8489149	-
AT1TE27395	Chr1	8489149	8490468	-
AT1TE27405	Chr1	8490640	8492849	+
AT1TE27550	Chr1	8538890	8539819	+
AT1TE27905	Chr1	8644567	8645833	-
AT1G24380	Chr1	8646056	8647674	+
AT1G24390	Chr1	8648201	8648995	+
AT1TE28055	Chr1	8691107	8691669	-
TEM0292	Chr1	8738077	8739032	+
TEM0293	Chr1	8740635	8741611	+
TEM0295	Chr1	8765494	8767454	+
AT1G24807	Chr1	8771370	8773535	-
TEM0296	Chr1	8771698	8775862	+
AT1G24851	Chr1	8778280	8780257	+
AT1TE28370	Chr1	8790240	8797988	-
AT1TE28380	Chr1	8793537	8794372	+
AT1TE28390	Chr1	8797988	8798224	-
AT1G25083	Chr1	8808549	8810443	-
AT1G25112	Chr1	8815186	8815962	+
AT1TE28450	Chr1	8815275	8815560	+
AT1G25141	Chr1	8817678	8818395	+
TEM0302	Chr1	8822954	8827142	+
AT1TE29060	Chr1	9004835	9015724	+
AT1TE29205	Chr1	9062304	9062678	+
AT1TE29570	Chr1	9175322	9177761	+
AT1TE29605	Chr1	9187619	9188638	+
AT1TE29990	Chr1	9304764	9305904	-
AT1TE30185	Chr1	9367448	9368006	+
AT1TE30360	Chr1	9417809	9418062	+
AT1TE30365	Chr1	9418062	9419054	-
AT1G27535	Chr1	9564726	9565134	+
AT1TE30875	Chr1	9582975	9583971	+
AT1TE30895	Chr1	9587249	9587684	-
AT1TE31190	Chr1	9676476	9691257	-
AT1G27870	Chr1	9706657	9707298	-
AT1TE31590	Chr1	9815821	9818677	+
AT1TE31935	Chr1	9909362	9909762	+
AT1TE31970	Chr1	9915356	9916480	-
AT1TE32325	Chr1	10021368	10021965	-
AT1TE32755	Chr1	10152772	10154690	+
AT1TE32760	Chr1	10154690	10155086	+
AT1TE32765	Chr1	10155200	10156790	+
AT1TE33340	Chr1	10314725	10315423	-
AT1TE33450	Chr1	10347111	10347383	+
AT1G29620	Chr1	10347363	10349017	+
AT1TE33455	Chr1	10347383	10348529	+
AT1TE33460	Chr1	10348566	10348766	+
AT1TE33670	Chr1	10421306	10421719	-
AT1TE34015	Chr1	10524717	10529695	+
AT1TE34045	Chr1	10532076	10533434	+
AT1G30060	Chr1	10545087	10545906	-
AT1TE34300	Chr1	10597578	10598342	+
AT1TE34315	Chr1	10602556	10604986	+
AT1TE34580	Chr1	10696713	10701584	+
AT1TE34650	Chr1	10723433	10725219	+
AT1TE34895	Chr1	10802425	10803341	-
AT1TE35060	Chr1	10852625	10853287	-
AT1TE35250	Chr1	10914998	10915973	+
AT1TE35275	Chr1	10920881	10921401	-
AT1TE35280	Chr1	10922412	10923823	-
AT1TE35305	Chr1	10929424	10931699	-
AT1TE35325	Chr1	10932148	10932697	-
AT1TE35460	Chr1	10982119	10982866	+
AT1TE35465	Chr1	10982870	10983613	-
AT1TE35620	Chr1	11027750	11027971	+
AT1G30972	Chr1	11044628	11045466	+
AT1TE35670	Chr1	11044864	11045603	+
AT1TE35680	Chr1	11048696	11051466	-
AT1G31095	Chr1	11102778	11103644	+
AT1TE35900	Chr1	11111657	11112104	+
AT1TE35955	Chr1	11125699	11126411	-
AT1TE36510	Chr1	11286624	11287694	-
AT1TE36715	Chr1	11351512	11352405	-
AT1G31960	Chr1	11479133	11479654	-
AT1TE37260	Chr1	11517045	11517911	-
AT1TE37275	Chr1	11521625	11523416	-
TEM0495	Chr1	11585600	11586378	+
AT1G32225	Chr1	11610114	11610625	+
TEM0499	Chr1	11620589	11620935	+
AT1TE37680	Chr1	11643079	11643309	+
AT1G32337	Chr1	11661815	11662122	+
AT1TE37910	Chr1	11704457	11704896	-
AT1TE37925	Chr1	11706445	11708850	+
AT1TE37935	Chr1	11710254	11711644	-
AT1TE37940	Chr1	11711644	11711972	+
AT1TE38035	Chr1	11735185	11737670	-
AT1TE38090	Chr1	11752260	11755077	+
AT1TE38210	Chr1	11789449	11794079	+
AT1TE38245	Chr1	11803470	11804092	-
AT1TE38300	Chr1	11817657	11818739	-
AT1G32720	Chr1	11834902	11836631	+
AT1TE38350	Chr1	11834922	11836068	+
AT1TE38530	Chr1	11887151	11901703	+
TEM0540	Chr1	11930591	11930915	+
AT1TE38700	Chr1	11957934	11958234	+
AT1TE38705	Chr1	11958316	11959087	+
AT1TE38820	Chr1	11987778	11988416	+
AT1TE38900	Chr1	12009494	12009841	+
AT1TE38940	Chr1	12016037	12020227	-
AT1TE39025	Chr1	12040915	12041279	-
AT1TE39145	Chr1	12079832	12080605	-
AT1TE39370	Chr1	12138861	12139089	-
AT1TE39515	Chr1	12172516	12177219	-
AT1TE39530	Chr1	12183386	12184077	-
AT1TE39535	Chr1	12183405	12184060	-
AT1TE39790	Chr1	12249075	12249414	+
AT1TE39800	Chr1	12252001	12252350	-
AT1TE39810	Chr1	12253056	12253455	-
AT1TE39830	Chr1	12263038	12263876	+
AT1TE39835	Chr1	12264053	12264315	+
AT1TE39840	Chr1	12264395	12264674	+
AT1TE39915	Chr1	12286563	12287597	+
AT1TE39970	Chr1	12297725	12298009	-
AT1TE39975	Chr1	12298455	12299158	-
AT1TE40090	Chr1	12327780	12330357	-
AT1G34015	Chr1	12361832	12363493	+
AT1TE40230	Chr1	12362546	12363127	-
AT1TE40240	Chr1	12363796	12366841	-
AT1TE40560	Chr1	12466961	12467841	-
AT1TE40570	Chr1	12467834	12468306	+
AT1TE40595	Chr1	12469123	12470347	-
AT1TE40605	Chr1	12470416	12471254	+
AT1G34290	Chr1	12498000	12498800	+
AT1TE40725	Chr1	12513238	12513824	+
AT1TE40775	Chr1	12526506	12526885	+
AT1G34390	Chr1	12556005	12559082	+
AT1TE40925	Chr1	12562099	12564283	-
AT1TE40930	Chr1	12565292	12565672	+
AT1TE40935	Chr1	12565672	12565951	-
AT1TE40950	Chr1	12569338	12569583	-
AT1TE40960	Chr1	12572722	12572963	-
AT1TE40975	Chr1	12574603	12574908	+
AT1TE40985	Chr1	12576535	12576782	-
AT1TE40990	Chr1	12577172	12577628	-
AT1G34410	Chr1	12577722	12580824	+
AT1TE41020	Chr1	12590347	12590958	-
AT1G34440	Chr1	12591348	12593579	-
AT1TE41030	Chr1	12592984	12593289	-
AT1TE41040	Chr1	12593311	12593599	-
AT1TE41310	Chr1	12651409	12651914	+
AT1TE41315	Chr1	12653039	12653378	+
AT1TE41415	Chr1	12699868	12701299	+
AT1TE41470	Chr1	12730089	12730320	+
AT1TE41480	Chr1	12730822	12731169	-
AT1TE41490	Chr1	12732945	12733344	-
AT1TE41500	Chr1	12733500	12734177	+
AT1TE41505	Chr1	12734326	12734552	+
AT1TE41585	Chr1	12760395	12761574	-
AT1G34830	Chr1	12793536	12794023	-
AT1G35030	Chr1	12808246	12809481	+
AT1TE41745	Chr1	12818272	12839582	+
AT1TE41805	Chr1	12845726	12845932	+
AT1TE41815	Chr1	12845960	12846615	+
AT1TE41820	Chr1	12847930	12849661	+
AT1TE41830	Chr1	12853970	12854294	-
AT1TE41835	Chr1	12854294	12854914	+
AT1TE41850	Chr1	12855065	12856081	-
AT1TE41865	Chr1	12862268	12863217	+
AT1TE41875	Chr1	12866248	12866863	-
AT1TE42025	Chr1	12899876	12900120	-
AT1TE42030	Chr1	12900120	12900445	+
AT1TE42035	Chr1	12900445	12900825	-
AT1G35215	Chr1	12902718	12906171	-
AT1TE42050	Chr1	12903458	12904712	-
AT1TE42055	Chr1	12904712	12905225	+
AT1TE42080	Chr1	12906564	12907856	+
AT1TE42150	Chr1	12926913	12927191	+
AT1G35240	Chr1	12927303	12930523	-
AT1TE42165	Chr1	12931469	12931733	+
AT1TE42205	Chr1	12942520	12942824	+
AT1TE42245	Chr1	12957924	12958268	+
AT1G35410	Chr1	13024161	13024941	+
AT1TE42625	Chr1	13056712	13056980	-
AT1TE42630	Chr1	13056980	13058485	+
AT1TE42635	Chr1	13058485	13061316	+
AT1TE42670	Chr1	13067783	13068628	+
AT1TE42710	Chr1	13080416	13081023	+
AT1TE42725	Chr1	13081893	13082094	+
AT1G35520	Chr1	13082819	13085830	-
AT1TE42745	Chr1	13086747	13087311	-
AT1TE42750	Chr1	13087384	13088087	+
AT1TE42790	Chr1	13097431	13098188	+
AT1G35540	Chr1	13108634	13111700	+
AT1TE42915	Chr1	13149787	13150516	+
AT1TE42925	Chr1	13151142	13151476	-
AT1TE42930	Chr1	13151879	13152923	-
AT1TE42975	Chr1	13166074	13167303	-
AT1TE43010	Chr1	13172925	13178593	+
AT1TE43050	Chr1	13187277	13192359	+
AT1TE43225	Chr1	13230992	13235723	-
AT1TE43230	Chr1	13236248	13236549	-
AT1TE43245	Chr1	13237481	13237795	+
AT1TE43265	Chr1	13240218	13240424	-
AT1TE43275	Chr1	13240745	13241300	-
AT1TE43305	Chr1	13247657	13250347	-
AT1TE43325	Chr1	13256863	13257271	-
AT1TE43340	Chr1	13260165	13260813	-
AT1TE43410	Chr1	13292350	13292802	+
AT1TE43420	Chr1	13292854	13295196	-
AT1G35820	Chr1	13308119	13309257	-
AT1TE43580	Chr1	13323939	13324230	+
AT1TE43680	Chr1	13355241	13355610	+
AT1TE43705	Chr1	13360591	13361126	-
AT1TE43805	Chr1	13397539	13400776	+
AT1TE43845	Chr1	13407452	13409316	+
AT1G36005	Chr1	13432418	13433062	+
AT1TE43925	Chr1	13433002	13433333	+
AT1TE43930	Chr1	13433333	13433620	+
AT1TE43950	Chr1	13435229	13435560	+
AT1TE43960	Chr1	13437314	13439349	+
AT1TE44105	Chr1	13479019	13480875	-
AT1TE44115	Chr1	13479193	13480165	-
AT1TE44125	Chr1	13482747	13490426	-
AT1TE44155	Chr1	13495370	13496086	-
AT1TE44175	Chr1	13497563	13498532	-
AT1TE44200	Chr1	13503766	13504265	-
AT1TE44230	Chr1	13507779	13515964	-
AT1TE44265	Chr1	13525013	13527625	-
AT1TE44435	Chr1	13572049	13573262	-
AT1TE44450	Chr1	13573424	13576126	-
AT1TE44520	Chr1	13592846	13593057	+
AT1TE44540	Chr1	13599711	13600943	+
AT1TE44625	Chr1	13623932	13624551	-
AT1TE44670	Chr1	13644551	13648938	-
AT1TE44705	Chr1	13654645	13655611	-
AT1TE44715	Chr1	13658878	13659269	+
AT1TE44720	Chr1	13659272	13667557	+
AT1TE44760	Chr1	13674916	13675271	+
AT1TE44775	Chr1	13682261	13682800	+
AT1TE44875	Chr1	13704116	13706547	-
AT1TE44890	Chr1	13707423	13708135	-
AT1TE44930	Chr1	13715002	13716730	-
AT1TE45045	Chr1	13747815	13748091	+
AT1TE45130	Chr1	13768439	13768753	-
AT1TE45150	Chr1	13779965	13781169	-
AT1TE45155	Chr1	13781169	13782305	-
AT1TE45170	Chr1	13785858	13786684	+
AT1TE45185	Chr1	13796032	13796397	+
AT1TE45200	Chr1	13796498	13800080	-
AT1TE45205	Chr1	13800080	13800666	-
AT1TE45285	Chr1	13812903	13813117	-
AT1TE45350	Chr1	13827495	13828484	-
AT1G36623	Chr1	13835832	13836121	+
AT1TE45410	Chr1	13849633	13850166	+
AT1TE45415	Chr1	13850478	13851106	+
AT1TE45425	Chr1	13851264	13852459	+
AT1TE45430	Chr1	13854429	13855683	-
AT1TE45480	Chr1	13865722	13867368	+
AT1G36675	Chr1	13867568	13869490	+
AT1TE45490	Chr1	13869520	13869865	+
AT1TE45495	Chr1	13869865	13870461	+
AT1TE45530	Chr1	13879034	13879890	-
AT1TE45545	Chr1	13881653	13882600	-
AT1TE45560	Chr1	13883072	13890962	+
AT1TE45570	Chr1	13894163	13894969	-
AT1TE45575	Chr1	13894970	13895793	-
AT1TE45610	Chr1	13901100	13901961	+
AT1TE45615	Chr1	13901966	13902395	+
AT1TE45620	Chr1	13902969	13903529	+
AT1TE45625	Chr1	13903927	13904250	+
AT1TE45630	Chr1	13904683	13905141	+
AT1TE45635	Chr1	13905141	13906966	+
AT1TE45640	Chr1	13906967	13907589	+
AT1TE45665	Chr1	13908905	13910793	-
AT1TE45670	Chr1	13912833	13913517	+
AT1TE45720	Chr1	13925068	13928742	+
AT1TE45730	Chr1	13926980	13928028	+
AT1TE45750	Chr1	13931785	13934802	+
AT1TE45760	Chr1	13933042	13934088	+
AT1TE45845	Chr1	13966452	13967701	-
AT1TE45850	Chr1	13967735	13968110	-
AT1TE45895	Chr1	13979640	13981876	-
AT1TE45960	Chr1	13994017	13994948	-
AT1TE45970	Chr1	13996686	13998078	-
AT1G36950	Chr1	14009673	14010822	-
AT1TE46025	Chr1	14009712	14010075	-
AT1TE46030	Chr1	14011339	14014304	-
AT1TE46085	Chr1	14031013	14032112	+
AT1G37010	Chr1	14040918	14041227	+
AT1TE46140	Chr1	14044361	14045934	+
AT1TE46295	Chr1	14097911	14098542	-
AT1TE46310	Chr1	14101822	14107573	-
AT1TE46325	Chr1	14107573	14108708	-
AT1TE46350	Chr1	14114770	14115220	-
AT1TE46365	Chr1	14117911	14118195	-
AT1TE46375	Chr1	14120422	14121025	+
AT1TE46385	Chr1	14121719	14125084	-
AT1TE46390	Chr1	14125084	14127032	-
AT1TE46395	Chr1	14127034	14128352	-
AT1TE46455	Chr1	14146256	14147510	-
AT1TE46575	Chr1	14178068	14183542	-
AT1TE46585	Chr1	14183784	14183995	-
AT1TE46590	Chr1	14185172	14185426	-
AT1TE46610	Chr1	14186799	14187334	-
AT1TE46620	Chr1	14187557	14188058	+
AT1TE46625	Chr1	14188116	14193130	+
AT1TE46640	Chr1	14207138	14208348	+
AT1TE46650	Chr1	14211194	14212645	+
AT1TE46790	Chr1	14261587	14262179	-
AT1TE46845	Chr1	14282412	14282638	-
AT1TE46865	Chr1	14286479	14286705	-
AT1TE46870	Chr1	14287084	14287757	-
AT1TE46880	Chr1	14287803	14288391	+
AT1TE46940	Chr1	14298031	14298666	+
AT1TE47010	Chr1	14309469	14309681	+
AT1TE47020	Chr1	14310436	14311679	+
AT1TE47040	Chr1	14312043	14312448	+
AT1TE47050	Chr1	14315189	14320850	+
AT1TE47105	Chr1	14334335	14340693	+
AT1TE47110	Chr1	14340694	14341290	+
AT1TE47125	Chr1	14341712	14344568	+
AT1TE47140	Chr1	14346433	14346915	+
AT1TE47155	Chr1	14349677	14350162	+
AT1TE47225	Chr1	14356802	14357624	-
AT1TE47275	Chr1	14367660	14368377	-
AT1TE47295	Chr1	14375773	14377214	-
AT1TE47315	Chr1	14381663	14383424	+
AT1TE47320	Chr1	14383425	14383837	-
AT1TE47355	Chr1	14390895	14392085	+
AT1TE47365	Chr1	14392569	14394783	+
AT1TE47435	Chr1	14401057	14401297	+
AT1TE47445	Chr1	14402455	14403277	-
AT1TE47465	Chr1	14407703	14407920	-
AT1TE47475	Chr1	14409857	14411546	+
AT1TE47510	Chr1	14421051	14421419	+
AT1TE47525	Chr1	14425145	14426830	-
AT1TE47535	Chr1	14427318	14427921	+
AT1TE47570	Chr1	14449178	14451469	+
AT1TE47655	Chr1	14468752	14472769	-
AT1TE47660	Chr1	14470210	14470653	+
AT1TE47680	Chr1	14476324	14476830	-
AT1TE47695	Chr1	14478732	14478943	+
AT1TE47700	Chr1	14478943	14480394	-
AT1TE47710	Chr1	14482198	14483890	-
AT1TE47740	Chr1	14492882	14493182	+
AT1TE47745	Chr1	14493182	14493851	+
AT1TE47765	Chr1	14499493	14502836	+
AT1TE48210	Chr1	14656722	14657163	-
AT1TE48220	Chr1	14661763	14662282	-
AT1TE48370	Chr1	14714186	14717295	+
AT1TE48375	Chr1	14717295	14717602	+
AT1G39070	Chr1	14733525	14745983	+
AT1TE48470	Chr1	14746646	14747211	-
AT1TE48660	Chr1	14805638	14816078	+
AT1TE48665	Chr1	14816079	14816620	+
AT1TE48695	Chr1	14825236	14825643	-
AT1TE48740	Chr1	14847385	14847791	-
AT1TE48770	Chr1	14875009	14875415	+
AT1G40086	Chr1	14930278	14932360	+
AT1TE49140	Chr1	14998918	14999727	-
AT1G40087	Chr1	14999615	15001868	-
AT1G40090	Chr1	15013792	15014764	+
AT1TE49280	Chr1	15057068	15058248	-
AT1TE49370	Chr1	15087873	15089939	-
AT1TE49405	Chr1	15094069	15095327	-
AT1TE49415	Chr1	15096702	15097188	-
AT1TE49420	Chr1	15097188	15097955	-
AT1TE49425	Chr1	15098439	15100966	-
AT1TE49430	Chr1	15100966	15102110	-
AT1TE49435	Chr1	15102110	15103242	-
AT1TE49455	Chr1	15104914	15106075	-
AT1TE49485	Chr1	15110617	15110898	-
AT1TE49500	Chr1	15112514	15113934	-
AT1TE49520	Chr1	15116187	15116782	-
AT1TE49525	Chr1	15117066	15117309	-
AT1TE49555	Chr1	15122051	15122272	-
AT1TE49560	Chr1	15122536	15124277	-
AT1TE49575	Chr1	15124536	15124760	-
AT1TE49605	Chr1	15130670	15132433	-
AT1TE49615	Chr1	15131229	15132421	-
AT1TE49655	Chr1	15136463	15136671	-
AT1TE49660	Chr1	15136671	15136969	-
AT1TE49680	Chr1	15142452	15142841	+
AT1TE49715	Chr1	15145719	15149691	-
AT1TE49725	Chr1	15147343	15147808	-
AT1TE49735	Chr1	15150750	15151061	+
AT1TE49770	Chr1	15168114	15168328	-
AT1TE49775	Chr1	15168329	15168546	-
AT1TE49785	Chr1	15169695	15170083	-
AT1TE49875	Chr1	15196996	15197741	-
AT1TE49880	Chr1	15197220	15197498	-
AT1TE49910	Chr1	15201954	15202202	-
AT1TE49935	Chr1	15205715	15205935	-
AT1TE50010	Chr1	15225980	15226233	-
AT1TE50015	Chr1	15226234	15227237	-
AT1TE50025	Chr1	15228667	15229050	-
AT1TE50040	Chr1	15230409	15230833	-
AT1TE50060	Chr1	15233437	15233912	-
AT1TE50100	Chr1	15236925	15238028	-
AT1TE50125	Chr1	15244911	15245133	-
AT1TE50130	Chr1	15245134	15245590	-
AT1TE50150	Chr1	15248315	15248945	-
AT1TE50175	Chr1	15254282	15257277	-
AT1TE50180	Chr1	15254567	15254786	-
AT1TE50185	Chr1	15257278	15258677	-
AT1TE50195	Chr1	15257922	15258139	-
AT1TE50240	Chr1	15263898	15264560	-
AT1TE50245	Chr1	15264561	15264864	-
AT1TE50250	Chr1	15264865	15267189	-
AT1TE50255	Chr1	15267190	15267476	-
AT1TE50265	Chr1	15269584	15269966	-
AT1TE50330	Chr1	15289512	15289859	-
AT1TE50370	Chr1	15299720	15300273	-
AT1TE50440	Chr1	15318353	15318703	-
AT1TE50465	Chr1	15323067	15323540	-
AT1TE50500	Chr1	15329719	15330059	-
AT1TE50540	Chr1	15335355	15336129	-
AT1TE50575	Chr1	15342073	15344365	-
AT1TE50640	Chr1	15352035	15352316	-
AT1TE50650	Chr1	15352447	15354854	-
AT1TE50655	Chr1	15352658	15352882	-
AT1TE50690	Chr1	15359927	15360198	-
AT1TE50700	Chr1	15361201	15367098	-
AT1TE50710	Chr1	15363727	15365357	-
AT1TE50715	Chr1	15365358	15365573	-
AT1TE50740	Chr1	15368663	15372351	-
AT1TE50760	Chr1	15375258	15375889	+
AT1TE50765	Chr1	15376087	15378181	-
AT1TE50815	Chr1	15406125	15406504	-
AT1TE50830	Chr1	15406648	15408336	-
AT1TE50915	Chr1	15428469	15429555	-
AT1TE50935	Chr1	15430652	15431406	-
AT1TE51185	Chr1	15549795	15550663	+
AT1TE51190	Chr1	15550663	15554136	-
AT1TE51285	Chr1	15585147	15586797	+
AT1TE51360	Chr1	15610626	15615403	-
AT1TE51385	Chr1	15618170	15622851	-
AT1TE51465	Chr1	15634434	15636526	-
AT1TE51525	Chr1	15643950	15645170	+
AT1TE51530	Chr1	15644538	15644761	+
AT1TE51535	Chr1	15645307	15645608	-
AT1TE51550	Chr1	15647088	15647288	+
AT1TE51560	Chr1	15649182	15649875	-
AT1TE51575	Chr1	15656928	15657481	+
AT1TE51595	Chr1	15662504	15663325	+
AT1TE51675	Chr1	15687715	15689270	-
AT1TE51760	Chr1	15721254	15721726	-
AT1TE51765	Chr1	15721726	15724634	+
AT1TE51795	Chr1	15729926	15730225	-
AT1TE51880	Chr1	15760243	15761056	+
AT1TE51885	Chr1	15760711	15760984	+
AT1TE52030	Chr1	15807462	15807869	+
AT1TE52045	Chr1	15809636	15810041	+
AT1TE52055	Chr1	15811238	15813218	+
AT1TE52090	Chr1	15816972	15818102	+
AT1TE52175	Chr1	15852915	15854122	+
AT1TE52190	Chr1	15856539	15857196	-
AT1TE52210	Chr1	15871658	15872288	+
AT1TE52215	Chr1	15872654	15872969	+
AT1TE52280	Chr1	15886308	15887099	+
AT1TE52400	Chr1	15910385	15911110	+
AT1TE52450	Chr1	15919707	15919927	-
AT1TE52460	Chr1	15920641	15920881	-
AT1TE52535	Chr1	15939329	15941469	+
AT1TE52610	Chr1	15961579	15965042	+
AT1TE52620	Chr1	15968718	15970140	-
AT1TE52685	Chr1	15984520	15984829	+
AT1TE52745	Chr1	16003505	16004974	-
AT1TE52795	Chr1	16012584	16019699	-
AT1TE52870	Chr1	16049209	16051714	+
AT1TE52930	Chr1	16074320	16074531	+
AT1TE53020	Chr1	16104842	16105379	-
AT1TE53025	Chr1	16105379	16106224	-
AT1TE53045	Chr1	16110310	16110655	+
AT1TE53065	Chr1	16113422	16114784	+
AT1TE53080	Chr1	16116468	16116752	+
AT1TE53085	Chr1	16116886	16117223	-
AT1TE53105	Chr1	16124702	16125144	-
AT1TE53180	Chr1	16146123	16146419	+
AT1TE53195	Chr1	16147917	16148400	-
AT1TE53280	Chr1	16164856	16165118	-
AT1TE53300	Chr1	16168193	16170418	-
AT1TE53310	Chr1	16171439	16172202	-
AT1TE53315	Chr1	16174270	16174793	+
AT1TE53385	Chr1	16194406	16194665	+
AT1TE53450	Chr1	16231805	16232128	+
AT1TE53465	Chr1	16236800	16237549	-
AT1TE53475	Chr1	16246204	16246418	+
AT1TE53495	Chr1	16248689	16249108	-
AT1TE53500	Chr1	16249784	16250104	-
AT1TE53510	Chr1	16252754	16254035	+
AT1TE53540	Chr1	16258425	16259815	-
AT1TE53550	Chr1	16260357	16260627	+
AT1TE53555	Chr1	16260839	16261097	-
AT1TE53635	Chr1	16281486	16291044	-
AT1TE53645	Chr1	16291842	16292255	+
AT1TE53650	Chr1	16292255	16294190	+
AT1TE53655	Chr1	16294195	16294480	-
AT1TE53660	Chr1	16296280	16302985	-
AT1TE53665	Chr1	16303515	16305190	+
AT1TE53675	Chr1	16305251	16305480	-
AT1TE53720	Chr1	16317381	16317875	+
AT1TE53735	Chr1	16321606	16324358	+
AT1TE53750	Chr1	16325183	16327367	-
AT1TE53760	Chr1	16329001	16329246	-
AT1TE53765	Chr1	16329246	16339556	+
AT1TE53815	Chr1	16342553	16347999	-
AT1TE53825	Chr1	16343289	16346824	+
AT1TE53870	Chr1	16350417	16351085	+
AT1TE53880	Chr1	16351340	16351942	-
AT1TE53895	Chr1	16353421	16354538	+
AT1G43330	Chr1	16359029	16360023	+
AT1TE53915	Chr1	16360020	16361175	-
AT1TE53930	Chr1	16363115	16364036	-
AT1TE53935	Chr1	16364036	16364385	+
AT1TE53945	Chr1	16364727	16365032	-
AT1TE54005	Chr1	16392787	16397819	-
AT1TE54010	Chr1	16393997	16394353	+
AT1TE54015	Chr1	16396139	16396969	+
AT1TE54020	Chr1	16399978	16401001	-
AT1TE54100	Chr1	16414129	16414869	+
AT1TE54110	Chr1	16418839	16420085	-
AT1TE54120	Chr1	16421132	16424144	-
AT1TE54135	Chr1	16423164	16423514	-
AT1TE54165	Chr1	16431064	16431612	-
AT1TE54235	Chr1	16449870	16451234	+
AT1TE54255	Chr1	16455250	16455556	-
AT1TE54270	Chr1	16457323	16457618	-
AT1TE54285	Chr1	16458645	16459076	-
AT1TE54310	Chr1	16462600	16463520	+
AT1TE54340	Chr1	16474621	16475037	-
AT1TE54350	Chr1	16475348	16476987	-
AT1TE54365	Chr1	16477163	16477700	+
AT1TE54370	Chr1	16477700	16478045	+
AT1TE54400	Chr1	16488880	16491738	-
AT1TE54430	Chr1	16500125	16500851	-
AT1TE54435	Chr1	16500851	16501097	-
AT1TE54550	Chr1	16544395	16545449	-
AT1TE54665	Chr1	16586476	16589501	+
AT1TE54670	Chr1	16589501	16592562	-
AT1TE54690	Chr1	16594798	16595103	+
AT1TE54710	Chr1	16596175	16598192	+
AT1TE54715	Chr1	16598192	16598634	+
AT1TE54720	Chr1	16598989	16600072	+
AT1TE54725	Chr1	16600131	16600658	-
AT1TE54760	Chr1	16607488	16611583	+
AT1TE54765	Chr1	16611583	16611866	+
AT1TE54795	Chr1	16624533	16625815	-
AT1TE54805	Chr1	16626036	16637234	-
AT1TE54925	Chr1	16659687	16664330	-
AT1TE54930	Chr1	16666208	16666702	-
AT1G43950	Chr1	16672582	16673952	-
AT1TE55000	Chr1	16680180	16683546	+
AT1TE55010	Chr1	16683893	16684692	-
AT1TE55015	Chr1	16685257	16686269	+
AT1TE55095	Chr1	16699068	16699412	+
AT1TE55200	Chr1	16712140	16713041	+
AT1TE55305	Chr1	16737734	16738517	-
AT1TE55315	Chr1	16742010	16742303	+
AT1TE55325	Chr1	16751223	16751705	+
AT1TE55520	Chr1	16791276	16791723	+
AT1TE55540	Chr1	16793591	16794406	+
AT1TE55750	Chr1	16841984	16842553	-
AT1TE55760	Chr1	16842553	16842836	-
AT1TE55765	Chr1	16842836	16844613	-
AT1TE55770	Chr1	16846506	16846715	-
AT1TE55825	Chr1	16860739	16861107	+
AT1TE55895	Chr1	16879338	16879926	+
AT1TE55900	Chr1	16879454	16879693	+
AT1TE55910	Chr1	16882184	16882942	-
AT1TE55920	Chr1	16885822	16887029	-
AT1TE56105	Chr1	16937847	16938113	-
AT1TE56120	Chr1	16939241	16939447	+
AT1TE56135	Chr1	16942840	16962196	+
AT1TE56140	Chr1	16953914	16957460	+
AT1TE56150	Chr1	16962198	16962405	-
AT1TE56155	Chr1	16962405	16963162	+
AT1TE56170	Chr1	16965618	16968377	-
AT1TE56185	Chr1	16969363	16969724	-
AT1TE56235	Chr1	16985001	16985852	+
AT1TE56245	Chr1	16986041	16987141	-
AT1TE56250	Chr1	16987141	16987347	-
AT1TE56255	Chr1	16987615	16990441	+
AT1TE56260	Chr1	16987715	16989955	+
AT1TE56300	Chr1	16997265	16999391	-
AT1G44980	Chr1	17004256	17005923	-
AT1TE56495	Chr1	17069722	17070185	-
AT1TE56505	Chr1	17071351	17074489	-
AT1TE56565	Chr1	17094314	17095350	+
AT1TE56620	Chr1	17107371	17111523	+
AT1TE56735	Chr1	17136381	17136946	-
AT1G45215	Chr1	17137703	17138251	+
AT1G45221	Chr1	17139448	17140012	+
AT1G45223	Chr1	17141192	17141771	+
AT1TE56805	Chr1	17145079	17145454	+
AT1TE56835	Chr1	17151788	17152908	+
AT1TE56945	Chr1	17187625	17188028	-
AT1TE56970	Chr1	17193651	17194071	-
AT1TE56975	Chr1	17194071	17194987	+
AT1TE56985	Chr1	17195772	17196166	-
AT1TE57020	Chr1	17201570	17201916	-
AT1TE57045	Chr1	17214214	17215150	+
AT1TE57070	Chr1	17216534	17217243	+
AT1TE57155	Chr1	17239651	17239902	-
TEM0961	Chr1	17281879	17282678	+
AT1TE57300	Chr1	17290068	17290814	-
AT1TE57330	Chr1	17300097	17300317	+
AT1TE57395	Chr1	17317733	17318172	-
AT1TE57460	Chr1	17340981	17341706	+
AT1TE57500	Chr1	17349653	17350231	+
AT1TE57635	Chr1	17404744	17406246	-
AT1TE57640	Chr1	17404787	17406194	-
AT1TE57685	Chr1	17411462	17411887	-
AT1G47470	Chr1	17414547	17415150	-
AT1TE57770	Chr1	17430821	17432230	+
AT1G47497	Chr1	17431009	17432133	-
AT1TE58000	Chr1	17502231	17502943	+
AT1TE58005	Chr1	17502943	17503720	-
AT1TE58055	Chr1	17515021	17515483	+
AT1G47695	Chr1	17546326	17546545	-
AT1TE58195	Chr1	17551125	17553241	-
AT1TE58205	Chr1	17551559	17552174	+
AT1TE58325	Chr1	17571313	17571922	-
AT1TE58335	Chr1	17574109	17574664	-
AT1G47765	Chr1	17574906	17576092	-
AT1TE58390	Chr1	17589740	17590601	-
AT1G47770	Chr1	17590266	17591261	+
AT1TE58430	Chr1	17605500	17606391	+
AT1TE58455	Chr1	17608021	17611915	-
AT1TE58505	Chr1	17624833	17627298	-
AT1TE58560	Chr1	17640403	17640631	+
AT1TE58615	Chr1	17654582	17655619	+
AT1TE58620	Chr1	17656304	17656748	+
AT1TE58625	Chr1	17656786	17660319	+
AT1TE58685	Chr1	17673760	17674478	+
AT1TE58740	Chr1	17689626	17690659	+
AT1TE58825	Chr1	17713519	17714780	+
TEM1029	Chr1	17758951	17761443	+
AT1TE59130	Chr1	17812265	17812524	+
AT1TE59135	Chr1	17812533	17813882	-
AT1TE59180	Chr1	17824799	17825358	-
AT1TE59235	Chr1	17842302	17845285	+
AT1TE59415	Chr1	17899729	17902421	+
AT1TE59535	Chr1	17936923	17937991	+
TEM1048	Chr1	17961031	17961843	+
AT1G48720	Chr1	18017730	18018458	+
AT1G48725	Chr1	18019274	18020642	+
AT1TE60540	Chr1	18270081	18270463	+
AT1TE60595	Chr1	18287173	18287579	+
AT1TE60640	Chr1	18299924	18302638	-
AT1TE60645	Chr1	18300266	18301257	-
AT1TE60725	Chr1	18320669	18321177	-
TEM1083	Chr1	18380182	18381201	+
AT1TE60920	Chr1	18386409	18386638	-
AT1TE60925	Chr1	18387256	18387486	+
AT1TE61170	Chr1	18456782	18457134	-
AT1TE61175	Chr1	18457137	18457358	-
TEM1094	Chr1	18547844	18548494	+
AT1TE61640	Chr1	18599462	18600585	-
AT1TE61750	Chr1	18632070	18632330	-
AT1TE61755	Chr1	18632330	18633937	-
AT1TE62125	Chr1	18745296	18745917	+
AT1TE62285	Chr1	18789807	18793041	-
AT1TE62585	Chr1	18894358	18895470	+
AT1TE62705	Chr1	18930795	18931187	+
AT1TE62825	Chr1	18969794	18971496	-
AT1TE62830	Chr1	18971499	18972199	-
AT1TE63030	Chr1	19026856	19027896	+
AT1TE63170	Chr1	19061527	19064852	+
AT1TE63445	Chr1	19146253	19146666	+
AT1TE63525	Chr1	19171977	19173840	-
AT1TE63530	Chr1	19172429	19172980	+
AT1TE63680	Chr1	19219594	19220224	+
AT1TE63790	Chr1	19247836	19249271	-
AT1TE63885	Chr1	19268641	19268871	-
AT1TE64055	Chr1	19327005	19329720	-
AT1TE64080	Chr1	19336305	19345618	+
TEM1168	Chr1	19368029	19368696	+
AT1TE64170	Chr1	19374608	19380747	-
AT1TE64445	Chr1	19465122	19467623	-
AT1TE64810	Chr1	19593687	19593888	-
AT1G52603	Chr1	19595751	19596295	+
AT1TE65060	Chr1	19675548	19680353	+
AT1TE65200	Chr1	19725521	19726017	+
AT1TE65205	Chr1	19726017	19735182	+
AT1TE65210	Chr1	19728520	19730000	+
AT1TE65360	Chr1	19767862	19769832	-
AT1TE65365	Chr1	19769025	19769639	+
TEM1208	Chr1	19780164	19781110	+
AT1TE65500	Chr1	19808115	19810029	+
AT1TE65895	Chr1	19933104	19933518	-
AT1TE65925	Chr1	19941384	19945434	+
TEM1227	Chr1	20112531	20114421	+
TEM1230	Chr1	20125099	20126133	+
AT1TE66640	Chr1	20172045	20172728	-
AT1TE66660	Chr1	20174320	20175287	+
AT1TE67110	Chr1	20312121	20312612	-
AT1TE67120	Chr1	20313844	20314471	-
AT1TE67150	Chr1	20317758	20317986	-
AT1TE67160	Chr1	20320068	20320291	-
AT1TE67185	Chr1	20329351	20330733	+
AT1TE67200	Chr1	20334146	20334801	-
AT1TE67635	Chr1	20475557	20475861	+
AT1TE67715	Chr1	20498930	20499325	-
AT1TE68120	Chr1	20622392	20622836	+
AT1TE68310	Chr1	20683158	20685683	-
AT1TE68395	Chr1	20709455	20711250	-
AT1TE68670	Chr1	20795215	20795640	+
AT1TE68675	Chr1	20795645	20796157	+
TEM1288	Chr1	20815572	20816095	+
AT1TE68785	Chr1	20826179	20827505	+
AT1TE69075	Chr1	20914274	20914938	+
AT1TE69270	Chr1	20972073	20974323	+
AT1TE69285	Chr1	20979422	20980832	+
AT1TE69735	Chr1	21105276	21105955	+
AT1TE69805	Chr1	21125354	21125756	-
AT1TE69815	Chr1	21125810	21126203	-
AT1TE70480	Chr1	21341499	21342530	-
AT1G57760	Chr1	21390003	21390565	+
AT1TE70615	Chr1	21390066	21391113	+
AT1TE70625	Chr1	21391810	21392244	-
AT1TE70735	Chr1	21428115	21428825	-
AT1TE71045	Chr1	21524994	21529851	-
AT1TE71300	Chr1	21608105	21608573	-
AT1TE71315	Chr1	21610652	21610855	+
AT1G58265	Chr1	21610909	21611388	+
AT1TE71330	Chr1	21615297	21616150	-
AT1TE71405	Chr1	21637418	21638230	-
AT1TE71540	Chr1	21681522	21682456	+
AT1TE71550	Chr1	21683263	21683488	+
AT1TE71705	Chr1	21731637	21732236	+
AT1TE71725	Chr1	21738688	21740552	+
AT1TE71740	Chr1	21741592	21741796	-
AT1TE71745	Chr1	21741796	21742041	-
AT1TE71755	Chr1	21744194	21745093	-
AT1TE71805	Chr1	21755303	21755914	-
AT1TE71810	Chr1	21755962	21756732	-
AT1TE71815	Chr1	21756213	21756635	-
AT1TE71820	Chr1	21756732	21756999	-
AT1G58725	Chr1	21771836	21773503	-
AT1TE71885	Chr1	21776840	21777347	-
AT1TE71930	Chr1	21788194	21788858	-
AT1G59030	Chr1	21808107	21809749	-
AT1TE71995	Chr1	21813098	21813605	-
AT1TE72000	Chr1	21815891	21816218	+
AT1TE72035	Chr1	21824452	21825116	-
AT1G59406	Chr1	21844352	21846019	-
AT1TE72110	Chr1	21853673	21853894	+
AT1TE72170	Chr1	21872790	21873779	-
AT1TE72330	Chr1	21918430	21918995	+
AT1TE72610	Chr1	21991153	21991448	-
AT1TE72615	Chr1	21991448	21992506	-
AT1G59920	Chr1	22059424	22059842	-
AT1TE72845	Chr1	22060008	22060730	-
AT1TE72850	Chr1	22060730	22060955	-
AT1G59930	Chr1	22060924	22061516	-
TEM1406	Chr1	22084083	22085573	+
AT1TE72980	Chr1	22105362	22106636	-
AT1TE72990	Chr1	22107438	22107932	+
AT1TE73015	Chr1	22112754	22113280	+
AT1TE73165	Chr1	22162738	22162956	-
AT1TE73170	Chr1	22163232	22163448	+
AT1TE73175	Chr1	22163556	22163874	+
AT1TE73180	Chr1	22163874	22164107	+
AT1TE73190	Chr1	22165043	22166347	-
AT1G60720	Chr1	22356860	22357941	+
TEM1424	Chr1	22356969	22358096	+
AT1TE74085	Chr1	22449882	22452429	+
AT1TE74860	Chr1	22693954	22699336	-
AT1TE75065	Chr1	22775860	22776617	+
AT1TE75090	Chr1	22778333	22779072	+
AT1TE75105	Chr1	22779550	22779758	+
AT1TE75330	Chr1	22850635	22851679	+
AT1TE75405	Chr1	22872210	22873790	+
AT1TE75780	Chr1	22991839	22994059	-
AT1TE75910	Chr1	23031590	23031816	+
AT1TE76215	Chr1	23118239	23123214	+
AT1TE76395	Chr1	23173922	23174556	+
AT1TE76400	Chr1	23174563	23174794	+
AT1TE76405	Chr1	23174794	23175117	-
AT1TE76520	Chr1	23211863	23212737	+
AT1TE76530	Chr1	23213592	23215627	+
AT1TE76620	Chr1	23240231	23242673	-
AT1TE76780	Chr1	23295655	23296870	-
AT1G62895	Chr1	23295989	23296858	+
TEM1505	Chr1	23639842	23640801	+
AT1TE78070	Chr1	23710108	23711252	+
AT1TE78560	Chr1	23875670	23877284	+
AT1TE78720	Chr1	23926446	23931762	-
TEM1526	Chr1	23965314	23966511	+
AT1TE79995	Chr1	24337781	24338144	-
AT1TE80035	Chr1	24350740	24352986	+
AT1TE80055	Chr1	24360686	24360979	-
TEM1551	Chr1	24384606	24385538	+
AT1TE80250	Chr1	24428899	24429318	+
AT1TE80825	Chr1	24604957	24605560	+
AT1G66100	Chr1	24605538	24606722	-
AT1TE81150	Chr1	24704986	24706028	+
AT1TE81195	Chr1	24718477	24719103	+
TEM1590	Chr1	24772160	24773144	+
AT1TE81560	Chr1	24831578	24832636	+
TEM1602	Chr1	24885003	24885837	+
AT1TE81825	Chr1	24907484	24908870	-
AT1TE82280	Chr1	25056917	25057282	+
TEM1614	Chr1	25095795	25097052	+
AT1TE82600	Chr1	25159042	25163500	+
AT1TE82640	Chr1	25180003	25182025	+
TEM1622	Chr1	25266011	25266717	+
AT1TE83220	Chr1	25357818	25358421	+
AT1TE83355	Chr1	25400478	25401474	-
AT1TE84070	Chr1	25639634	25641849	-
TEM1647	Chr1	25660008	25660628	+
AT1TE84335	Chr1	25722565	25723569	+
TEM1655	Chr1	25750882	25752029	+
AT1TE84520	Chr1	25779499	25780236	+
AT1TE85730	Chr1	26169149	26171479	-
AT1TE86360	Chr1	26366602	26371673	+
AT1TE86375	Chr1	26374207	26375957	+
AT1TE86795	Chr1	26510665	26511224	-
AT1TE87630	Chr1	26779007	26781652	-
AT1TE87965	Chr1	26880168	26880722	-
AT1TE87970	Chr1	26880722	26881419	+
AT1TE87980	Chr1	26881781	26882453	-
AT1G71320	Chr1	26882485	26883818	+
AT1TE89135	Chr1	27240714	27241286	+
AT1TE89750	Chr1	27428714	27429293	-
AT1TE90305	Chr1	27597411	27597674	+
TEM1718	Chr1	27635151	27637889	+
AT1TE92165	Chr1	28161035	28163376	+
AT1TE92655	Chr1	28311272	28312504	-
AT1TE92905	Chr1	28398200	28399052	-
AT1TE93320	Chr1	28526860	28527671	+
AT1TE94305	Chr1	28827348	28829167	+
AT1TE95100	Chr1	29078380	29079012	+
AT1TE95255	Chr1	29125353	29125901	+
AT1TE95675	Chr1	29244136	29244718	+
AT1TE95910	Chr1	29319210	29319629	+
AT1TE95915	Chr1	29319629	29320701	-
TEM1777	Chr1	29496360	29496677	+
AT1TE96855	Chr1	29611749	29612226	-
AT1TE98060	Chr1	29983276	29984079	+
AT1TE98065	Chr1	29984079	29984291	-
TEM1789	Chr1	30200065	30200464	+
AT1TE98910	Chr1	30250977	30253348	-
AT1TE98915	Chr1	30253349	30253650	-
TEM1791	Chr1	30426595	30427671	+
AT2TE00085	Chr2	49859	50285	-
AT2TE00115	Chr2	64005	68112	-
AT2TE00130	Chr2	69925	70795	+
AT2TE00135	Chr2	70795	71407	+
AT2TE00145	Chr2	71802	72196	-
AT2TE01125	Chr2	276793	277137	-
AT2TE01265	Chr2	303115	303588	+
AT2TE01315	Chr2	314626	315282	-
AT2TE01560	Chr2	376595	377257	-
TEM1860	Chr2	438610	438891	+
TEM1864	Chr2	448227	448873	+
TEM1867	Chr2	455565	456332	+
AT2G02103	Chr2	530241	531636	-
AT2TE02465	Chr2	566756	582571	+
TEM1882	Chr2	594216	594427	+
AT2TE02725	Chr2	639520	640379	+
AT2TE03060	Chr2	708840	709399	+
AT2TE03290	Chr2	754358	754596	+
AT2TE03505	Chr2	794449	795647	+
AT2TE03565	Chr2	808410	809054	+
AT2TE03635	Chr2	825444	825986	+
AT2TE03870	Chr2	870815	871058	+
AT2TE03965	Chr2	886379	887438	+
AT2TE04085	Chr2	909733	914341	+
TEM1935	Chr2	921175	921376	+
AT2TE04145	Chr2	932540	933984	+
AT2TE04155	Chr2	933516	933803	-
AT2TE04160	Chr2	934042	934254	-
AT2TE04385	Chr2	979859	980818	-
AT2TE04525	Chr2	1011232	1012992	-
AT2TE04820	Chr2	1075557	1076405	-
AT2TE04865	Chr2	1083518	1085478	-
AT2G03567	Chr2	1085525	1086607	+
AT2G03570	Chr2	1085560	1085988	-
AT2TE04875	Chr2	1085931	1086588	-
AT2TE04885	Chr2	1086753	1086980	-
AT2G03821	Chr2	1167303	1168206	-
AT2G03930	Chr2	1204920	1206249	-
AT2TE05425	Chr2	1206014	1206684	-
AT2TE05430	Chr2	1206971	1207472	+
AT2TE05440	Chr2	1207565	1208618	+
AT2TE05755	Chr2	1264726	1271840	-
TEM1989	Chr2	1279515	1280355	+
AT2TE05825	Chr2	1287238	1287844	+
AT2TE05855	Chr2	1293564	1294497	-
AT2TE05920	Chr2	1302350	1303112	-
AT2TE05925	Chr2	1303567	1303996	+
AT2TE05945	Chr2	1304858	1305626	+
AT2G04041	Chr2	1307981	1308544	-
AT2TE05965	Chr2	1309802	1310540	-
AT2TE06275	Chr2	1372544	1373218	-
AT2TE06390	Chr2	1388831	1393901	-
AT2TE06405	Chr2	1395259	1399516	+
AT2TE06450	Chr2	1409691	1410522	+
AT2TE06470	Chr2	1412403	1413298	+
AT2TE06480	Chr2	1413343	1413623	+
AT2TE06535	Chr2	1422126	1422779	+
AT2TE06550	Chr2	1423164	1425427	+
AT2TE06745	Chr2	1457070	1458341	+
AT2TE06785	Chr2	1464640	1465329	+
AT2TE06940	Chr2	1500804	1501182	-
AT2TE06955	Chr2	1505384	1513550	+
AT2TE07130	Chr2	1546532	1546872	-
AT2TE07155	Chr2	1552057	1552873	-
AT2TE07350	Chr2	1596921	1597493	+
AT2TE07390	Chr2	1601055	1601379	+
AT2TE07425	Chr2	1607836	1609415	-
AT2TE07460	Chr2	1613977	1617960	+
AT2TE07550	Chr2	1629643	1637481	-
AT2TE07645	Chr2	1652148	1652819	+
AT2TE07650	Chr2	1652284	1652758	-
AT2TE07655	Chr2	1653403	1653776	-
AT2TE07745	Chr2	1670443	1672763	+
AT2TE07925	Chr2	1709583	1709801	-
AT2G04870	Chr2	1716168	1716386	-
AT2TE08100	Chr2	1740838	1741399	-
AT2TE08110	Chr2	1741425	1757083	+
AT2TE08125	Chr2	1757633	1758395	-
AT2TE08160	Chr2	1772224	1773634	+
AT2TE08185	Chr2	1776388	1776704	-
AT2TE08205	Chr2	1779099	1779402	-
AT2TE08210	Chr2	1779402	1779805	-
AT2TE08275	Chr2	1793706	1796054	+
AT2TE08285	Chr2	1797232	1797810	-
AT2TE08315	Chr2	1803765	1804016	+
AT2G05105	Chr2	1836841	1837441	+
AT2G05117	Chr2	1838592	1839014	-
AT2TE08500	Chr2	1850220	1850451	-
AT2TE08510	Chr2	1850560	1851208	-
AT2TE08515	Chr2	1850848	1851122	+
AT2TE08645	Chr2	1879064	1880386	+
AT2TE08655	Chr2	1881944	1882743	-
AT2TE08660	Chr2	1882744	1883142	-
AT2TE08670	Chr2	1887176	1887579	-
AT2TE08690	Chr2	1889937	1890242	-
AT2TE08695	Chr2	1890242	1890698	+
AT2TE08765	Chr2	1902751	1903923	+
AT2TE08780	Chr2	1905594	1906142	+
TEM2093	Chr2	1916954	1918139	+
AT2TE09020	Chr2	1955831	1956540	-
AT2TE09070	Chr2	1963666	1965808	+
AT2TE09170	Chr2	1987722	1989017	+
AT2TE09220	Chr2	2010682	2011030	-
AT2TE09280	Chr2	2021015	2022558	-
AT2TE09370	Chr2	2041435	2041932	-
AT2TE09375	Chr2	2041963	2054217	-
AT2TE09395	Chr2	2058044	2059187	-
AT2TE09400	Chr2	2059201	2059642	+
AT2TE09410	Chr2	2061855	2062677	-
AT2TE09420	Chr2	2063330	2063901	+
AT2TE09430	Chr2	2065088	2066950	-
AT2TE09490	Chr2	2074040	2075017	+
AT2TE09495	Chr2	2075017	2075338	-
AT2TE09600	Chr2	2101050	2101414	-
AT2TE09625	Chr2	2105629	2106808	+
AT2TE09705	Chr2	2130244	2130570	+
AT2TE09710	Chr2	2131034	2133043	-
AT2TE09720	Chr2	2133089	2134050	+
AT2TE09740	Chr2	2137255	2137625	+
AT2TE09745	Chr2	2137646	2138076	+
AT2TE09760	Chr2	2138396	2139390	+
AT2TE09785	Chr2	2140023	2140750	-
AT2TE09790	Chr2	2140750	2141033	-
AT2TE09850	Chr2	2149471	2149863	-
AT2TE09865	Chr2	2149945	2150864	+
AT2TE09885	Chr2	2153888	2157853	+
AT2TE09890	Chr2	2154869	2155879	-
AT2TE10070	Chr2	2186855	2187197	-
AT2TE10085	Chr2	2191056	2191575	+
AT2TE10090	Chr2	2191575	2192438	-
AT2TE10110	Chr2	2195657	2195907	-
AT2TE10115	Chr2	2195961	2196827	-
AT2TE10190	Chr2	2209831	2210864	-
AT2TE10200	Chr2	2211062	2212136	-
AT2TE10230	Chr2	2217433	2218007	+
AT2TE10240	Chr2	2218105	2218470	+
AT2TE10245	Chr2	2218691	2218921	+
AT2TE10255	Chr2	2218964	2220284	+
AT2TE10260	Chr2	2220285	2221186	-
AT2TE10270	Chr2	2223751	2224419	+
AT2TE10280	Chr2	2225583	2225807	+
AT2TE10295	Chr2	2226195	2227022	+
AT2TE10305	Chr2	2227312	2227560	-
AT2TE10330	Chr2	2232386	2233113	-
AT2TE10385	Chr2	2246168	2256074	-
AT2TE10490	Chr2	2273548	2274110	+
AT2TE10500	Chr2	2280054	2282263	+
AT2TE10515	Chr2	2284253	2284530	+
AT2TE10585	Chr2	2296811	2298015	+
AT2TE10590	Chr2	2297112	2297763	+
AT2TE10595	Chr2	2297815	2298721	+
AT2TE10605	Chr2	2298979	2299781	+
AT2TE10615	Chr2	2299821	2301751	-
AT2TE10690	Chr2	2318503	2322143	+
AT2TE10710	Chr2	2320939	2321202	+
AT2TE10870	Chr2	2356134	2356474	+
AT2TE10940	Chr2	2373258	2374260	-
AT2G06095	Chr2	2373522	2374745	+
AT2TE10960	Chr2	2382310	2382673	-
AT2TE11015	Chr2	2410158	2411238	-
AT2TE11115	Chr2	2442265	2443224	-
AT2TE11120	Chr2	2443432	2443913	+
AT2TE11155	Chr2	2454397	2454634	+
AT2TE11250	Chr2	2469090	2470294	-
AT2TE11260	Chr2	2471484	2472656	-
AT2TE11340	Chr2	2492017	2494444	+
AT2TE11405	Chr2	2516560	2516873	-
AT2TE11420	Chr2	2520665	2521490	+
AT2TE11425	Chr2	2521828	2522232	+
AT2TE11430	Chr2	2522605	2522871	+
AT2TE11490	Chr2	2536602	2537527	-
AT2TE11500	Chr2	2539100	2541787	-
AT2TE11515	Chr2	2542616	2559353	-
AT2TE11560	Chr2	2576248	2578241	-
AT2TE11570	Chr2	2578686	2578925	-
AT2TE11635	Chr2	2590778	2591779	-
AT2TE11645	Chr2	2591838	2592555	+
AT2TE11655	Chr2	2593230	2593431	-
AT2TE11690	Chr2	2601870	2602447	-
AT2TE11695	Chr2	2602447	2603916	-
AT2G06555	Chr2	2604148	2604927	-
AT2TE11715	Chr2	2606792	2607607	-
AT2TE11725	Chr2	2607811	2608131	-
AT2TE11735	Chr2	2609185	2610900	-
AT2TE11750	Chr2	2616338	2617117	-
AT2TE11780	Chr2	2628284	2629677	+
AT2TE11810	Chr2	2636199	2637023	+
AT2TE11840	Chr2	2652444	2655100	-
AT2TE11895	Chr2	2664599	2665423	+
AT2TE11935	Chr2	2688362	2689571	-
AT2TE11955	Chr2	2691571	2693140	+
AT2TE11980	Chr2	2698714	2699307	-
AT2TE12075	Chr2	2730706	2731078	-
AT2TE12095	Chr2	2732864	2734487	-
AT2TE12145	Chr2	2746010	2747865	+
AT2TE12295	Chr2	2789108	2790792	+
AT2TE12390	Chr2	2818659	2822102	+
AT2TE12400	Chr2	2820435	2821032	+
AT2TE12415	Chr2	2824393	2825266	+
AT2TE12450	Chr2	2838794	2841583	+
AT2TE12465	Chr2	2843830	2844755	+
AT2TE12475	Chr2	2849743	2852332	+
AT2TE12560	Chr2	2882423	2882730	-
AT2TE12575	Chr2	2885743	2886231	+
AT2TE12715	Chr2	2914577	2915088	+
AT2TE12720	Chr2	2915103	2915354	-
AT2TE12725	Chr2	2915354	2916148	+
AT2TE12735	Chr2	2918990	2919887	-
AT2TE12850	Chr2	2951867	2952410	-
AT2TE12910	Chr2	2962930	2964188	+
AT2TE13025	Chr2	2985783	2987306	+
AT2G07200	Chr2	2989205	2989878	+
AT2TE13140	Chr2	3013131	3014478	-
AT2TE13145	Chr2	3014478	3023011	+
AT2TE13160	Chr2	3023327	3023664	+
AT2G07290	Chr2	3029561	3030035	+
AT2TE13315	Chr2	3057684	3058062	+
AT2TE13320	Chr2	3058062	3058583	-
AT2TE13330	Chr2	3060845	3061226	+
AT2TE13340	Chr2	3074311	3075732	-
AT2TE13345	Chr2	3074943	3075461	-
AT2TE13390	Chr2	3089468	3092288	-
AT2TE13420	Chr2	3094961	3096558	+
AT2TE13430	Chr2	3096581	3097805	-
AT2TE13465	Chr2	3109914	3110725	+
AT2TE13495	Chr2	3117079	3117673	-
AT2TE13505	Chr2	3118266	3119694	-
AT2TE13510	Chr2	3120315	3121017	+
AT2TE13550	Chr2	3136156	3136590	+
AT2TE13570	Chr2	3139307	3140895	-
AT2TE13760	Chr2	3187501	3187850	+
AT2TE13770	Chr2	3189903	3191105	-
AT2TE13785	Chr2	3192021	3192234	+
AT2TE13855	Chr2	3205871	3206171	-
AT2TE13895	Chr2	3211702	3213374	-
AT2TE13930	Chr2	3216759	3217143	-
AT2TE13965	Chr2	3234188	3234485	-
AT2TE15385	Chr2	3528628	3530340	+
AT2TE15395	Chr2	3531451	3531674	-
AT2TE15500	Chr2	3554461	3556283	+
AT2TE15520	Chr2	3558187	3559719	-
AT2TE15590	Chr2	3573423	3575224	+
AT2TE15965	Chr2	3664936	3665626	+
AT2TE15990	Chr2	3675404	3676269	-
AT2TE16005	Chr2	3680275	3681190	+
AT2TE16145	Chr2	3720205	3721518	+
AT2TE16165	Chr2	3726670	3727339	+
AT2TE16210	Chr2	3740652	3740857	+
AT2TE16250	Chr2	3766910	3767233	-
AT2TE16265	Chr2	3770956	3773386	-
AT2TE16270	Chr2	3773391	3779884	-
AT2TE16275	Chr2	3778066	3778707	+
AT2TE16430	Chr2	3819848	3820355	+
AT2TE16435	Chr2	3820355	3820574	-
AT2TE16455	Chr2	3823959	3825125	+
AT2TE16795	Chr2	3941811	3942745	-
AT2TE16805	Chr2	3944665	3945905	+
AT2TE16865	Chr2	3966273	3973249	-
AT2TE16890	Chr2	3975743	3977958	+
AT2TE16925	Chr2	3985409	3985993	-
AT2TE17075	Chr2	4025414	4025966	+
AT2TE17120	Chr2	4047603	4048502	+
AT2TE17125	Chr2	4048502	4049687	-
AT2TE17230	Chr2	4077881	4079717	-
AT2TE17235	Chr2	4079801	4080201	-
AT2TE17240	Chr2	4080623	4080825	-
AT2TE17280	Chr2	4086823	4087456	-
AT2TE17395	Chr2	4120757	4121314	-
AT2TE17400	Chr2	4121359	4122247	-
AT2TE17490	Chr2	4139712	4140977	+
AT2TE17550	Chr2	4148679	4149237	+
AT2TE17605	Chr2	4169555	4170633	-
AT2TE17715	Chr2	4195872	4196795	-
AT2TE17730	Chr2	4203242	4205065	+
AT2TE17770	Chr2	4212690	4214460	+
AT2TE17775	Chr2	4214635	4215061	+
AT2TE17790	Chr2	4216583	4217012	-
AT2TE17795	Chr2	4217156	4218952	-
AT2TE17805	Chr2	4219022	4220768	-
AT2TE17905	Chr2	4249408	4250359	-
AT2TE17940	Chr2	4256625	4258322	+
AT2TE18015	Chr2	4288452	4292852	-
AT2TE18040	Chr2	4301301	4301567	-
AT2TE18045	Chr2	4301567	4301882	-
AT2G10920	Chr2	4301708	4302134	-
AT2TE18055	Chr2	4302304	4303175	-
AT2G10955	Chr2	4323589	4324032	-
AT2TE18180	Chr2	4326003	4326583	+
AT2TE18200	Chr2	4329265	4329921	-
AT2G10975	Chr2	4334959	4335909	+
AT2TE18240	Chr2	4336397	4337750	+
AT2TE18255	Chr2	4340591	4341175	+
AT2TE18290	Chr2	4350094	4350353	+
AT2TE18330	Chr2	4357342	4358519	-
AT2TE18335	Chr2	4358541	4360141	-
AT2TE18380	Chr2	4370211	4371438	-
AT2TE18445	Chr2	4402022	4404336	+
AT2TE18485	Chr2	4414833	4415890	+
AT2TE18545	Chr2	4425636	4428291	+
AT2TE18560	Chr2	4428333	4428681	+
AT2TE18585	Chr2	4430013	4430630	+
AT2G11200	Chr2	4451924	4452388	+
AT2TE18775	Chr2	4476375	4476894	+
AT2TE18895	Chr2	4518080	4522501	-
AT2TE18915	Chr2	4522544	4524021	+
AT2TE18940	Chr2	4538820	4540514	+
AT2TE18945	Chr2	4541674	4542380	+
AT2TE18950	Chr2	4542380	4543115	-
AT2TE19035	Chr2	4589568	4590885	-
AT2TE19095	Chr2	4609630	4610317	-
AT2TE19120	Chr2	4615799	4617477	+
AT2TE19125	Chr2	4617477	4618126	-
AT2TE19130	Chr2	4618135	4618416	+
AT2G11522	Chr2	4622122	4622752	+
AT2TE19280	Chr2	4645996	4646220	+
AT2TE19310	Chr2	4650263	4650556	+
AT2TE19335	Chr2	4651691	4652045	+
AT2TE19355	Chr2	4656356	4658311	+
AT2TE19580	Chr2	4713536	4714827	+
AT2TE19665	Chr2	4741325	4742126	-
AT2TE19900	Chr2	4796348	4797386	+
AT2TE19990	Chr2	4818683	4818884	+
AT2TE20030	Chr2	4829821	4830253	+
AT2TE20040	Chr2	4831814	4832215	+
AT2TE20045	Chr2	4832216	4836549	+
AT2TE20050	Chr2	4833803	4834568	+
AT2TE20140	Chr2	4861228	4869425	-
AT2G12280	Chr2	4922282	4922679	+
AT2TE20260	Chr2	4933931	4937269	+
AT2TE20315	Chr2	4947647	4948280	+
AT2TE20345	Chr2	4960269	4961257	-
AT2TE20360	Chr2	4961869	4962551	-
AT2TE20370	Chr2	4965022	4965612	-
AT2TE20390	Chr2	4966141	4966654	+
AT2TE20415	Chr2	4972375	4972927	+
AT2TE20475	Chr2	4997163	4997464	+
AT2TE20540	Chr2	5010068	5010650	-
AT2G12405	Chr2	5010792	5011590	-
AT2TE20625	Chr2	5021454	5021753	-
AT2TE20640	Chr2	5023016	5024024	-
AT2TE20710	Chr2	5037564	5038393	+
AT2TE20770	Chr2	5053731	5054374	+
AT2TE20795	Chr2	5056449	5056725	+
AT2TE20810	Chr2	5057719	5059782	-
AT2TE20875	Chr2	5079626	5080809	-
AT2TE20880	Chr2	5079914	5080572	+
AT2TE20885	Chr2	5080809	5081390	-
AT2TE20890	Chr2	5081405	5081652	+
AT2TE20900	Chr2	5084035	5084645	-
AT2TE20955	Chr2	5099032	5099840	-
AT2TE20970	Chr2	5111839	5112091	+
AT2TE21010	Chr2	5119427	5120962	-
AT2TE21145	Chr2	5160942	5161356	+
AT2TE21155	Chr2	5161732	5163010	-
AT2TE21240	Chr2	5177554	5177893	-
AT2TE21280	Chr2	5187014	5188726	-
AT2TE21365	Chr2	5237983	5238319	-
AT2TE21395	Chr2	5247443	5248679	+
AT2TE21490	Chr2	5270335	5270985	+
AT2TE21510	Chr2	5275944	5280409	+
AT2TE21515	Chr2	5277052	5278229	+
AT2TE21525	Chr2	5278270	5279897	+
AT2G12935	Chr2	5315038	5316041	-
AT2TE21650	Chr2	5319817	5320036	-
AT2TE21720	Chr2	5347126	5348175	+
AT2TE21725	Chr2	5348175	5348586	+
AT2TE21970	Chr2	5423295	5427630	+
AT2TE22005	Chr2	5431952	5433163	-
AT2TE22020	Chr2	5435852	5436305	-
AT2TE22040	Chr2	5440526	5444575	+
AT2TE22140	Chr2	5465293	5465929	+
AT2TE22265	Chr2	5501964	5502507	-
AT2TE22275	Chr2	5505885	5506110	+
AT2TE22295	Chr2	5509343	5511171	-
AT2TE22350	Chr2	5534247	5534492	-
AT2TE22355	Chr2	5534494	5534704	-
TEM2298	Chr2	5542261	5542607	+
AT2TE22470	Chr2	5556690	5557064	-
AT2TE22475	Chr2	5557064	5557360	+
AT2TE22480	Chr2	5557360	5558208	-
AT2TE22485	Chr2	5558218	5559023	-
AT2TE22540	Chr2	5583336	5583581	-
AT2TE22545	Chr2	5583581	5584814	-
AT2TE22565	Chr2	5588705	5588937	-
AT2G13430	Chr2	5590052	5591422	+
AT2G13450	Chr2	5598421	5599923	-
AT2G13463	Chr2	5609569	5610324	-
AT2TE22795	Chr2	5645995	5646595	+
AT2TE22805	Chr2	5647516	5648363	-
AT2TE22860	Chr2	5657703	5658120	-
AT2TE22880	Chr2	5659136	5660083	-
AT2TE22910	Chr2	5670142	5671281	+
AT2TE23175	Chr2	5725592	5727402	-
AT2G13770	Chr2	5736570	5737863	+
AT2TE23240	Chr2	5736800	5737912	+
AT2TE23245	Chr2	5737912	5739437	-
AT2TE23255	Chr2	5739506	5741402	+
AT2TE23310	Chr2	5748969	5749476	-
AT2TE23340	Chr2	5751630	5752351	-
AT2TE23395	Chr2	5761104	5762740	-
AT2TE23410	Chr2	5763126	5763357	-
AT2TE23415	Chr2	5763359	5765118	-
AT2TE23420	Chr2	5763861	5764281	-
AT2TE23430	Chr2	5765173	5765624	+
AT2TE23435	Chr2	5765627	5765913	-
AT2TE23490	Chr2	5777435	5777825	-
AT2TE23505	Chr2	5778901	5780089	+
AT2TE23515	Chr2	5786739	5787728	-
AT2TE23540	Chr2	5792230	5792781	-
AT2TE23555	Chr2	5798250	5798545	-
AT2G13845	Chr2	5798558	5799584	+
AT2TE23560	Chr2	5798983	5799531	-
AT2TE23575	Chr2	5799770	5800033	-
AT2TE23580	Chr2	5800101	5800354	-
AT2TE23610	Chr2	5802351	5802624	-
AT2TE23635	Chr2	5804725	5804990	+
AT2TE23650	Chr2	5806214	5806777	+
AT2TE23655	Chr2	5806777	5807651	+
AT2TE23665	Chr2	5807813	5808800	-
AT2TE23670	Chr2	5808800	5814890	-
AT2TE23675	Chr2	5814898	5815248	+
AT2TE23685	Chr2	5815361	5816878	+
AT2TE23715	Chr2	5822425	5823512	-
AT2TE23765	Chr2	5828654	5829387	-
AT2TE23815	Chr2	5840705	5842706	-
AT2TE23825	Chr2	5842847	5843478	+
AT2TE23905	Chr2	5869425	5872143	-
AT2TE23945	Chr2	5882870	5883093	-
AT2G14000	Chr2	5884600	5885985	-
AT2TE23965	Chr2	5886321	5900126	-
AT2TE24045	Chr2	5904640	5905727	+
AT2TE24175	Chr2	5934242	5934567	+
AT2TE24335	Chr2	5960274	5975813	-
AT2TE24340	Chr2	5975826	5976218	-
AT2TE24370	Chr2	5982003	5984954	-
AT2TE24385	Chr2	5984985	5996552	+
AT2TE24405	Chr2	5998869	5999322	+
AT2TE24415	Chr2	6001939	6003836	-
AT2TE24420	Chr2	6003836	6004804	-
AT2TE24525	Chr2	6027026	6031164	-
AT2TE24590	Chr2	6044027	6044310	-
AT2G14265	Chr2	6044120	6045141	-
AT2TE24600	Chr2	6044346	6045023	+
AT2TE24605	Chr2	6045023	6045423	+
AT2TE24610	Chr2	6045423	6046666	+
AT2TE24615	Chr2	6046688	6046890	+
AT2TE24680	Chr2	6059587	6070822	-
AT2TE24745	Chr2	6083671	6084369	+
AT2TE24750	Chr2	6084369	6084726	-
AT2TE24755	Chr2	6084726	6084947	+
TEM2348	Chr2	6088954	6089161	+
AT2TE24820	Chr2	6099361	6103251	+
AT2TE24835	Chr2	6101771	6102380	-
AT2TE24935	Chr2	6128814	6130916	+
AT2TE24965	Chr2	6139498	6141111	-
AT2TE25110	Chr2	6179826	6180959	+
AT2TE25320	Chr2	6217198	6217671	-
AT2TE25470	Chr2	6248272	6250339	-
AT2TE25510	Chr2	6255656	6256501	+
AT2TE25530	Chr2	6262530	6263222	+
AT2TE25540	Chr2	6263278	6271099	-
AT2TE25740	Chr2	6306614	6307823	+
AT2G14765	Chr2	6351289	6351964	+
AT2TE26090	Chr2	6395401	6395847	+
AT2TE26180	Chr2	6414431	6414738	-
AT2TE26280	Chr2	6440659	6441088	+
AT2TE26285	Chr2	6441588	6442987	-
AT2TE26310	Chr2	6444580	6446129	-
AT2TE26490	Chr2	6480203	6480777	+
AT2TE26495	Chr2	6482551	6483170	+
AT2TE26525	Chr2	6489632	6489883	-
AT2TE26560	Chr2	6497153	6497664	+
AT2TE26625	Chr2	6513788	6514170	-
AT2TE26635	Chr2	6514756	6516381	-
AT2TE26680	Chr2	6524255	6533075	-
AT2TE26685	Chr2	6527042	6528197	-
AT2TE26700	Chr2	6533082	6533326	+
AT2TE26830	Chr2	6560673	6561012	-
AT2TE26855	Chr2	6566207	6578013	-
AT2TE26865	Chr2	6578798	6585273	+
AT2TE26870	Chr2	6579086	6579573	-
AT2TE26910	Chr2	6592369	6607860	-
AT2TE27095	Chr2	6648448	6649077	+
AT2TE27150	Chr2	6657192	6658609	+
AT2TE27155	Chr2	6658609	6658931	+
AT2TE27160	Chr2	6658931	6659670	-
AT2TE27165	Chr2	6659670	6663104	+
AT2TE27170	Chr2	6663104	6664354	+
AT2TE27270	Chr2	6678407	6680828	-
AT2TE27360	Chr2	6695355	6695630	-
AT2TE27440	Chr2	6714863	6716186	-
AT2TE27455	Chr2	6716625	6717298	-
AT2TE27490	Chr2	6728744	6730806	-
AT2TE27500	Chr2	6730846	6731440	+
AT2TE27505	Chr2	6731441	6731698	-
AT2TE27520	Chr2	6736792	6737316	-
AT2TE27540	Chr2	6739148	6740419	+
AT2TE27565	Chr2	6746356	6746982	-
AT2G15450	Chr2	6747536	6749256	+
AT2TE27575	Chr2	6749822	6750375	-
AT2G15460	Chr2	6750934	6752647	+
AT2TE27585	Chr2	6753217	6753771	-
AT2G15470	Chr2	6754330	6756051	+
AT2TE27805	Chr2	6813810	6814095	-
AT2TE27870	Chr2	6837288	6843328	+
AT2TE27950	Chr2	6862821	6864153	+
AT2TE28020	Chr2	6881260	6884610	+
AT2TE28035	Chr2	6886556	6887874	+
AT2TE28060	Chr2	6892214	6893183	+
AT2TE28110	Chr2	6900958	6902038	+
AT2TE28120	Chr2	6902114	6902589	+
AT2TE28125	Chr2	6903697	6904011	+
AT2TE28205	Chr2	6922610	6926139	-
AT2TE28290	Chr2	6944414	6944900	+
AT2TE28295	Chr2	6945308	6945717	-
AT2TE28370	Chr2	6968215	6969460	-
AT2G16016	Chr2	6971075	6971330	-
AT2G16030	Chr2	6973673	6975007	-
AT2G16040	Chr2	6976017	6977683	+
AT2TE28420	Chr2	6978798	6979043	+
AT2TE28470	Chr2	6992405	6992621	-
AT2TE28475	Chr2	6992621	6993741	+
AT2TE28755	Chr2	7066728	7069463	+
AT2TE28760	Chr2	7069463	7070960	+
AT2TE28950	Chr2	7111246	7113066	+
AT2TE29105	Chr2	7153439	7155251	-
AT2TE29120	Chr2	7155510	7156608	-
AT2TE29150	Chr2	7161191	7161512	-
AT2TE29220	Chr2	7173003	7176725	+
AT2TE29225	Chr2	7176725	7179021	+
AT2TE29340	Chr2	7201900	7203864	-
AT2TE29360	Chr2	7206068	7206512	-
AT2TE29450	Chr2	7224083	7229124	-
AT2TE29465	Chr2	7237513	7237749	-
AT2TE29725	Chr2	7289217	7291729	-
AT2TE29730	Chr2	7292883	7295592	+
AT2TE30005	Chr2	7347548	7348692	+
AT2TE30045	Chr2	7351987	7352209	-
AT2TE30050	Chr2	7352209	7352535	-
AT2TE30055	Chr2	7352542	7353315	-
AT2TE30410	Chr2	7418893	7419975	+
AT2TE30430	Chr2	7420748	7421827	-
AT2TE30540	Chr2	7447876	7448246	+
AT2TE30980	Chr2	7535955	7537244	+
AT2TE31215	Chr2	7581421	7584152	+
AT2TE31350	Chr2	7616379	7616686	+
TEM2553	Chr2	7680773	7682441	+
TEM2554	Chr2	7690072	7690560	+
AT2TE31895	Chr2	7730093	7730569	+
AT2TE32315	Chr2	7813435	7816137	-
AT2TE32320	Chr2	7814788	7815541	+
AT2TE32740	Chr2	7904683	7905115	+
AT2TE32755	Chr2	7906525	7907294	+
AT2TE32760	Chr2	7906788	7907050	-
AT2TE32815	Chr2	7916844	7917097	+
TEM2585	Chr2	7956017	7956608	+
AT2TE33100	Chr2	7976288	7976557	+
AT2TE33290	Chr2	8016807	8017528	-
AT2TE33360	Chr2	8035385	8036872	+
AT2TE33540	Chr2	8075978	8078202	-
AT2TE33970	Chr2	8172739	8173699	+
TEM2612	Chr2	8198331	8200297	+
AT2TE34520	Chr2	8300283	8300532	-
AT2TE34525	Chr2	8302346	8302941	-
AT2TE34910	Chr2	8379697	8381945	-
AT2TE35115	Chr2	8420456	8422950	+
AT2G19510	Chr2	8453200	8453713	+
AT2G19850	Chr2	8568607	8569863	+
TEM2649	Chr2	8590491	8591623	+
AT2TE36130	Chr2	8625897	8626202	-
TEM2653	Chr2	8643520	8644179	+
AT2TE37235	Chr2	8854331	8855262	+
AT2TE37380	Chr2	8883840	8885588	+
AT2TE37435	Chr2	8893462	8895164	-
TEM2673	Chr2	8962537	8964037	+
AT2TE37940	Chr2	8993389	8993817	+
AT2TE38110	Chr2	9029774	9030696	+
AT2TE38245	Chr2	9057250	9059623	-
TEM2683	Chr2	9063141	9064415	+
AT2TE38575	Chr2	9121957	9125818	+
AT2TE38760	Chr2	9161384	9161867	+
AT2TE39490	Chr2	9310249	9311451	-
AT2TE39505	Chr2	9311658	9313019	-
AT2TE40160	Chr2	9446506	9447387	+
AT2TE40165	Chr2	9447387	9449390	+
AT2TE40345	Chr2	9484719	9485436	-
AT2G22440	Chr2	9528910	9530060	+
AT2TE41085	Chr2	9633214	9633547	+
AT2TE41090	Chr2	9633547	9635121	+
AT2TE41125	Chr2	9643235	9643560	+
AT2TE41170	Chr2	9653804	9654719	+
AT2TE41175	Chr2	9654887	9655175	+
AT2TE41180	Chr2	9655175	9656263	+
AT2TE41185	Chr2	9656263	9656798	-
AT2TE41350	Chr2	9692172	9692783	+
AT2TE41560	Chr2	9736179	9736424	-
AT2TE41575	Chr2	9738977	9739256	+
AT2TE42355	Chr2	9896797	9897276	+
AT2TE42460	Chr2	9922600	9923495	-
AT2TE42725	Chr2	9982031	9982482	+
AT2TE42810	Chr2	10001479	10009658	-
AT2TE42855	Chr2	10018072	10020460	+
AT2TE43165	Chr2	10085508	10093594	-
AT2TE43435	Chr2	10151666	10152427	+
AT2TE43870	Chr2	10254667	10255016	-
AT2TE43875	Chr2	10255017	10255512	+
AT2TE43880	Chr2	10255512	10256096	-
AT2TE44350	Chr2	10351315	10351572	+
AT2TE44355	Chr2	10351572	10352460	+
AT2TE44365	Chr2	10354208	10354627	-
AT2TE44435	Chr2	10368954	10369177	-
AT2TE44620	Chr2	10406355	10407468	-
AT2TE44750	Chr2	10436265	10437353	-
AT2TE44900	Chr2	10466226	10467597	+
AT2TE44910	Chr2	10467648	10468258	+
AT2TE46360	Chr2	10796546	10797354	+
AT2TE46405	Chr2	10806935	10807318	+
AT2TE46725	Chr2	10872824	10873584	-
AT2TE46740	Chr2	10874039	10874573	+
AT2TE46765	Chr2	10879870	10880247	+
AT2TE47025	Chr2	10931246	10932314	-
AT2TE47030	Chr2	10932320	10932561	+
AT2TE48010	Chr2	11129317	11129911	-
AT2TE48170	Chr2	11161050	11161354	-
AT2TE48185	Chr2	11162722	11163040	+
AT2TE48710	Chr2	11266044	11267285	-
AT2TE48795	Chr2	11285066	11287457	-
AT2TE48885	Chr2	11302822	11303056	+
AT2TE49270	Chr2	11386831	11387491	-
AT2TE49335	Chr2	11397207	11400204	-
AT2TE49350	Chr2	11398505	11399580	-
AT2TE49890	Chr2	11508158	11508795	-
TEM2906	Chr2	11549241	11550407	+
AT2TE50120	Chr2	11555401	11556304	-
AT2TE50570	Chr2	11643280	11644011	+
TEM2919	Chr2	11721707	11722072	+
AT2TE51170	Chr2	11769515	11770995	+
AT2TE51630	Chr2	11867185	11868276	-
AT2TE52020	Chr2	11952512	11952791	+
AT2TE52165	Chr2	11982480	11983952	-
AT2TE52670	Chr2	12091952	12094487	+
AT2TE53790	Chr2	12331673	12332810	+
AT2TE54185	Chr2	12413694	12413986	-
AT2TE54845	Chr2	12554585	12556266	-
AT2TE54850	Chr2	12556266	12556550	-
AT2TE54860	Chr2	12556655	12557227	+
AT2TE54910	Chr2	12566155	12578422	+
AT2TE55690	Chr2	12738686	12740291	-
TEM2976	Chr2	12742369	12743547	+
AT2G29880	Chr2	12742536	12743749	+
AT2G29920	Chr2	12754424	12755384	+
AT2G29925	Chr2	12755006	12755431	-
TEM2982	Chr2	12809677	12810971	+
AT2TE56020	Chr2	12811690	12811914	-
AT2TE56025	Chr2	12812062	12812737	-
AT2TE56035	Chr2	12812786	12813045	-
TEM2994	Chr2	13031415	13032781	+
AT2TE57945	Chr2	13211354	13211592	+
AT2TE58010	Chr2	13223058	13227048	-
TEM3004	Chr2	13232802	13233678	+
AT2TE58200	Chr2	13266915	13269004	+
AT2G31215	Chr2	13299807	13300302	+
AT2TE58720	Chr2	13374540	13375293	+
AT2TE58950	Chr2	13421585	13421907	+
AT2TE58955	Chr2	13421907	13422281	-
AT2TE60380	Chr2	13717664	13717940	-
TEM3028	Chr2	13807922	13808170	+
AT2TE61215	Chr2	13885933	13886495	+
AT2TE61325	Chr2	13906365	13908806	-
AT2G33175	Chr2	14062699	14063623	-
AT2TE63435	Chr2	14333262	14335722	-
AT2G34120	Chr2	14405339	14405551	+
AT2TE63800	Chr2	14407883	14412426	+
AT2TE63825	Chr2	14418346	14418624	+
AT2TE64035	Chr2	14457371	14458307	-
AT2TE64500	Chr2	14553741	14555904	+
AT2G34655	Chr2	14596565	14597543	+
AT2TE64915	Chr2	14636699	14637241	-
AT2TE65220	Chr2	14701312	14702080	-
AT2TE65785	Chr2	14810759	14811945	+
AT2TE65790	Chr2	14811945	14812180	-
AT2G35280	Chr2	14859378	14860200	-
AT2TE66465	Chr2	14951836	14952861	+
TEM3077	Chr2	15140413	15141392	+
TEM3079	Chr2	15190469	15190752	+
AT2TE69490	Chr2	15566813	15568070	+
AT2TE69630	Chr2	15595120	15597210	+
TEM3099	Chr2	15821298	15821879	+
AT2G38220	Chr2	16007891	16010932	+
AT2TE71770	Chr2	16030118	16030650	+
AT2TE72380	Chr2	16150386	16151304	-
TEM3115	Chr2	16272640	16273357	+
AT2TE73350	Chr2	16347337	16348054	+
AT2TE73500	Chr2	16379575	16380843	-
TEM3127	Chr2	16537579	16537886	+
TEM3133	Chr2	16595774	16596725	+
AT2TE74725	Chr2	16625760	16626817	+
AT2G40310	Chr2	16834065	16835711	+
AT2TE76420	Chr2	16972742	16973832	+
AT2TE77780	Chr2	17253100	17255275	-
AT2TE77795	Chr2	17256001	17256671	-
AT2TE78210	Chr2	17337766	17342489	+
TEM3162	Chr2	17407713	17408593	+
AT2TE78600	Chr2	17417946	17419429	-
AT2TE78945	Chr2	17487162	17489023	+
TEM3168	Chr2	17634857	17635837	+
TEM3178	Chr2	18165558	18166073	+
TEM3188	Chr2	18496811	18498647	+
AT2TE84415	Chr2	18594858	18595311	+
AT2TE84695	Chr2	18652625	18655464	-
AT2G46190	Chr2	18971769	18972804	+
AT2TE87285	Chr2	19172073	19172665	-
AT2TE87405	Chr2	19195237	19195777	-
AT2G46765	Chr2	19220194	19220586	+
AT2TE88035	Chr2	19322500	19323957	+
AT2TE89040	Chr2	19527733	19529185	+
AT3TE00195	Chr3	42844	43071	-
AT3G01345	Chr3	129138	130749	+
AT3TE01800	Chr3	422485	423446	-
AT3TE01805	Chr3	422656	423210	-
AT3TE02240	Chr3	525369	526255	+
TEM3243	Chr3	848615	849591	+
AT3TE04915	Chr3	1170593	1170799	-
AT3TE04925	Chr3	1170828	1171101	+
AT3TE05385	Chr3	1283137	1283991	-
AT3TE05790	Chr3	1370337	1371629	-
AT3TE06595	Chr3	1571366	1572215	+
AT3TE06750	Chr3	1607056	1607551	+
AT3TE08270	Chr3	1964162	1964439	-
AT3TE08290	Chr3	1969731	1970008	+
AT3TE09500	Chr3	2258771	2259575	-
AT3TE09505	Chr3	2259575	2260955	+
AT3G07380	Chr3	2360988	2362824	-
TEM3281	Chr3	2617115	2617528	+
AT3TE11070	Chr3	2628570	2628892	+
AT3TE11080	Chr3	2629083	2630228	-
AT3G09510	Chr3	2921804	2923258	+
AT3TE12275	Chr3	2922916	2923292	+
AT3TE12470	Chr3	2970564	2971575	-
AT3TE12935	Chr3	3079956	3080603	-
AT3TE13070	Chr3	3120034	3121290	-
AT3G10900	Chr3	3410252	3412070	-
AT3G10950	Chr3	3423893	3424566	+
AT3TE14615	Chr3	3478328	3479086	+
AT3TE14880	Chr3	3538836	3539161	-
AT3TE16150	Chr3	3837725	3838970	+
AT3TE16695	Chr3	3964981	3966146	+
AT3TE17765	Chr3	4216357	4217139	-
AT3G13370	Chr3	4341664	4342230	+
AT3TE19315	Chr3	4579238	4579714	+
AT3TE19335	Chr3	4584686	4585388	+
AT3TE20050	Chr3	4752110	4753096	+
AT3TE20240	Chr3	4796010	4797014	-
AT3G14670	Chr3	4927682	4928956	+
AT3TE20780	Chr3	4929014	4932433	-
AT3TE21700	Chr3	5151995	5155306	-
AT3TE21735	Chr3	5164893	5165123	+
AT3TE22200	Chr3	5277961	5286732	-
AT3TE22595	Chr3	5378807	5380229	-
AT3TE23620	Chr3	5622026	5622885	+
AT3TE23625	Chr3	5622887	5623117	-
AT3TE23630	Chr3	5623117	5623755	-
AT3TE23740	Chr3	5651128	5652442	+
AT3G16820	Chr3	5728016	5729174	-
AT3TE24145	Chr3	5743726	5745910	-
AT3TE24355	Chr3	5792481	5793393	+
AT3TE24360	Chr3	5793393	5793670	+
AT3TE24685	Chr3	5865854	5866442	+
AT3G17190	Chr3	5867392	5868181	+
AT3TE24910	Chr3	5929424	5930702	+
TEM3390	Chr3	5954735	5955383	+
AT3G17400	Chr3	5954887	5955444	+
AT3TE25425	Chr3	6052617	6055313	+
AT3TE25510	Chr3	6073210	6073718	+
AT3TE26475	Chr3	6293655	6293946	-
AT3TE27270	Chr3	6486326	6487244	-
AT3TE27635	Chr3	6576462	6577031	+
AT3TE29145	Chr3	6940414	6942653	-
AT3G20030	Chr3	6990254	6991462	+
AT3TE29360	Chr3	6991495	6993208	-
AT3TE29575	Chr3	7040845	7041553	-
TEM3431	Chr3	7233867	7237355	+
TEM3434	Chr3	7279050	7280160	+
AT3G20950	Chr3	7342675	7344744	+
TEM3448	Chr3	7565579	7567113	+
TEM3456	Chr3	7669570	7669938	+
TEM3459	Chr3	7703694	7704370	+
AT3TE32600	Chr3	7765550	7766063	+
AT3TE32605	Chr3	7766063	7766760	+
AT3G22142	Chr3	7803492	7808046	-
AT3G22125	Chr3	7803890	7808056	+
AT3TE32785	Chr3	7806865	7807215	-
AT3TE32940	Chr3	7850390	7851163	-
AT3TE33205	Chr3	7920883	7922456	-
AT3TE33460	Chr3	7980036	7980706	-
AT3TE33475	Chr3	7981053	7982069	+
AT3TE33545	Chr3	7994671	7997039	+
AT3TE33960	Chr3	8093488	8095938	+
AT3TE33980	Chr3	8101038	8102913	-
AT3TE34105	Chr3	8129931	8130281	-
AT3TE34115	Chr3	8131122	8131369	-
AT3TE34430	Chr3	8209850	8210857	-
AT3TE34525	Chr3	8230714	8232502	-
AT3G23172	Chr3	8272138	8272657	-
AT3TE34940	Chr3	8332089	8332378	+
AT3G23380	Chr3	8373375	8375098	+
AT3TE35325	Chr3	8426325	8426566	+
AT3TE35825	Chr3	8537354	8543559	+
AT3TE36950	Chr3	8820081	8820304	+
AT3TE37025	Chr3	8836965	8837177	+
AT3TE37060	Chr3	8842970	8857757	+
AT3TE37065	Chr3	8857757	8858230	+
AT3TE37110	Chr3	8872328	8873544	-
AT3TE37120	Chr3	8874888	8875097	+
AT3TE37155	Chr3	8883339	8884016	+
AT3G24514	Chr3	8937382	8938949	+
AT3G24517	Chr3	8938106	8938641	-
AT3G24542	Chr3	8956257	8957667	+
TEM3567	Chr3	8976681	8978423	+
AT3TE37690	Chr3	9011212	9017190	-
TEM3578	Chr3	9140017	9140984	+
AT3G25090	Chr3	9140039	9141094	-
AT3TE38375	Chr3	9186567	9187013	-
AT3TE38660	Chr3	9256633	9258148	+
AT3TE38920	Chr3	9321792	9322767	+
AT3TE38980	Chr3	9331662	9332047	-
AT3G25720	Chr3	9380234	9381405	+
AT3TE39205	Chr3	9383797	9386424	-
AT3TE39820	Chr3	9540332	9541250	+
AT3TE39890	Chr3	9557990	9559675	-
AT3TE40125	Chr3	9608085	9610451	-
AT3TE40145	Chr3	9613220	9625546	-
AT3TE40295	Chr3	9664188	9665522	+
AT3TE40420	Chr3	9692213	9697529	-
AT3TE40425	Chr3	9697667	9697985	+
AT3TE40530	Chr3	9723883	9736151	+
AT3TE40545	Chr3	9739655	9740357	+
AT3G26616	Chr3	9787574	9788141	-
AT3TE40740	Chr3	9788017	9788321	-
AT3TE40820	Chr3	9808121	9809189	+
TEM3645	Chr3	9848155	9848390	+
AT3G26800	Chr3	9862173	9862778	+
AT3TE41205	Chr3	9899560	9900766	+
AT3TE41560	Chr3	9988713	9988934	+
AT3TE41565	Chr3	9988934	9989375	+
AT3TE41650	Chr3	10006153	10008498	-
AT3TE41755	Chr3	10031353	10031934	-
AT3TE41835	Chr3	10048838	10049586	-
AT3TE41915	Chr3	10065946	10067204	+
AT3G27329	Chr3	10114192	10114560	+
AT3TE42270	Chr3	10166811	10168575	+
AT3TE42300	Chr3	10176657	10177809	+
AT3TE42305	Chr3	10177822	10178026	-
AT3TE42490	Chr3	10222652	10223004	+
AT3TE42635	Chr3	10262503	10263076	+
AT3TE42640	Chr3	10263130	10263537	+
AT3TE42650	Chr3	10263961	10264796	-
AT3TE42790	Chr3	10293244	10293485	-
AT3TE42795	Chr3	10293485	10297584	+
AT3TE42960	Chr3	10339748	10345640	+
AT3TE42965	Chr3	10345642	10345969	-
AT3G27999	Chr3	10402872	10403511	+
AT3TE43220	Chr3	10404824	10405397	+
AT3TE43225	Chr3	10405397	10405961	+
AT3TE43255	Chr3	10414025	10415387	+
AT3TE43365	Chr3	10441684	10441898	-
AT3TE43460	Chr3	10460989	10463046	+
AT3TE43470	Chr3	10463418	10465097	+
AT3G28120	Chr3	10463794	10464000	-
AT3TE43530	Chr3	10476271	10477032	+
AT3TE43600	Chr3	10493461	10493716	+
AT3TE43660	Chr3	10509520	10511764	+
AT3TE43740	Chr3	10530766	10531241	-
AT3TE43745	Chr3	10531241	10532212	-
AT3TE43800	Chr3	10542836	10544367	+
AT3TE43815	Chr3	10545359	10546148	-
AT3TE43820	Chr3	10546150	10547027	+
AT3TE43930	Chr3	10564356	10565242	+
TEM3741	Chr3	10570681	10571206	+
AT3TE44240	Chr3	10643824	10644992	-
AT3TE44245	Chr3	10644992	10646188	+
AT3TE44370	Chr3	10678585	10679032	-
AT3TE44490	Chr3	10708721	10709398	+
AT3TE44540	Chr3	10717784	10718343	-
TEM3762	Chr3	10719115	10720471	+
AT3TE44695	Chr3	10751088	10752363	-
AT3TE44720	Chr3	10757768	10758658	-
AT3TE44730	Chr3	10757950	10758585	-
AT3TE44750	Chr3	10762479	10763043	+
AT3TE44755	Chr3	10763044	10764367	+
AT3TE44945	Chr3	10809928	10810294	-
AT3TE44950	Chr3	10810401	10812267	-
AT3G28785	Chr3	10810579	10811197	-
AT3TE44955	Chr3	10812268	10813118	-
AT3TE44965	Chr3	10816140	10818849	-
AT3TE44975	Chr3	10818889	10821523	-
AT3TE45000	Chr3	10826856	10827076	-
AT3TE45160	Chr3	10862064	10862930	-
AT3TE45170	Chr3	10862967	10863590	-
AT3TE45180	Chr3	10863667	10865704	+
AT3TE45185	Chr3	10865704	10866018	-
AT3TE45260	Chr3	10885295	10885588	-
AT3TE45285	Chr3	10891854	10892253	+
AT3TE45355	Chr3	10908038	10908450	-
AT3TE45525	Chr3	10946430	10947167	+
AT3TE45620	Chr3	10970101	10976062	-
AT3TE45625	Chr3	10977588	10977978	-
AT3TE45630	Chr3	10977978	10980184	-
AT3TE45720	Chr3	10997024	10997812	-
AT3TE45810	Chr3	11021714	11022665	+
AT3G29033	Chr3	11024007	11024889	+
TEM3823	Chr3	11036092	11036857	+
AT3TE45970	Chr3	11054128	11054934	-
AT3TE45975	Chr3	11054934	11055895	+
AT3TE45980	Chr3	11055895	11062842	-
AT3TE45990	Chr3	11064859	11065193	-
AT3G29080	Chr3	11069352	11071376	+
AT3TE46045	Chr3	11078904	11079437	+
AT3TE46085	Chr3	11086582	11087329	+
AT3TE46090	Chr3	11087329	11087583	+
AT3TE46125	Chr3	11090199	11090406	-
AT3TE46130	Chr3	11090406	11091000	-
AT3TE46270	Chr3	11132203	11132616	+
AT3TE46345	Chr3	11143793	11144214	-
AT3TE46430	Chr3	11166782	11167413	-
AT3TE46470	Chr3	11169366	11170627	-
AT3TE46510	Chr3	11175866	11176668	-
AT3TE46520	Chr3	11176820	11181607	-
AT3TE46525	Chr3	11181607	11182175	+
AT3TE46545	Chr3	11182782	11183100	+
AT3TE46550	Chr3	11183100	11183889	-
AT3TE46555	Chr3	11183889	11184951	+
AT3TE46560	Chr3	11184952	11185256	-
AT3TE46565	Chr3	11185499	11187434	+
AT3TE46615	Chr3	11195885	11196448	+
AT3TE46630	Chr3	11197033	11198152	-
AT3TE46665	Chr3	11203883	11205163	+
AT3TE46670	Chr3	11205164	11206300	-
AT3TE46675	Chr3	11206300	11206501	-
TEM3855	Chr3	11215241	11215847	+
AT3TE46725	Chr3	11217460	11218074	-
AT3TE46765	Chr3	11223349	11223667	+
AT3TE46775	Chr3	11225886	11227023	-
AT3TE46795	Chr3	11232569	11233669	+
AT3TE46830	Chr3	11241141	11241384	-
AT3TE46855	Chr3	11244524	11245283	-
AT3TE47185	Chr3	11316209	11321541	-
AT3TE47200	Chr3	11319278	11319496	-
AT3TE47210	Chr3	11321548	11322119	-
AT3TE47230	Chr3	11328627	11335552	+
AT3TE47260	Chr3	11345815	11348584	+
AT3TE47265	Chr3	11348584	11348854	+
AT3TE47295	Chr3	11360137	11362878	-
AT3TE47300	Chr3	11360691	11361223	-
AT3TE47360	Chr3	11369854	11370572	-
AT3TE47370	Chr3	11371110	11372438	-
AT3TE47385	Chr3	11373123	11375009	+
AT3TE47395	Chr3	11375114	11376934	+
AT3TE47400	Chr3	11376935	11378111	-
AT3TE47420	Chr3	11378751	11379010	-
AT3TE47430	Chr3	11379199	11379470	-
AT3TE47440	Chr3	11379652	11379916	-
AT3TE47450	Chr3	11380106	11380377	-
AT3TE47465	Chr3	11381082	11381848	+
AT3TE47495	Chr3	11387807	11388453	-
AT3TE47515	Chr3	11393820	11394418	-
AT3TE47520	Chr3	11396199	11396528	+
AT3TE47525	Chr3	11396528	11397740	+
AT3TE47545	Chr3	11403506	11403725	+
AT3TE47580	Chr3	11414124	11414552	-
AT3TE47610	Chr3	11425193	11425728	+
AT3TE47615	Chr3	11425728	11426498	+
AT3TE47665	Chr3	11435176	11435931	+
AT3TE47670	Chr3	11436681	11437648	+
AT3TE47695	Chr3	11444174	11444716	+
AT3TE47705	Chr3	11444984	11446158	+
AT3G29633	Chr3	11452509	11453497	-
AT3TE47755	Chr3	11455559	11456359	-
AT3TE47770	Chr3	11459171	11459898	-
AT3TE47775	Chr3	11459898	11461314	-
AT3TE47810	Chr3	11469441	11470089	-
AT3G29631	Chr3	11470374	11470821	-
AT3G29637	Chr3	11471333	11472130	-
AT3TE47815	Chr3	11472256	11472525	+
AT3G29638	Chr3	11473109	11475559	+
AT3G29639	Chr3	11478633	11480033	-
AT3G29645	Chr3	11480384	11481190	-
AT3TE47840	Chr3	11481301	11481722	+
AT3TE47875	Chr3	11488558	11491070	-
AT3TE47890	Chr3	11495662	11496911	-
AT3TE47895	Chr3	11496959	11497674	-
AT3TE47925	Chr3	11502055	11503915	-
AT3TE47930	Chr3	11503915	11504517	+
AT3TE47955	Chr3	11509111	11509345	-
AT3TE48070	Chr3	11541282	11549498	+
AT3TE48090	Chr3	11552014	11553785	-
AT3TE48100	Chr3	11556019	11556504	-
AT3G29740	Chr3	11578468	11578847	+
AT3TE48175	Chr3	11587318	11588352	-
AT3TE48215	Chr3	11602484	11603489	-
AT3TE48255	Chr3	11610372	11611237	-
AT3G29785	Chr3	11612357	11612686	-
AT3TE48285	Chr3	11618613	11621527	+
AT3TE48315	Chr3	11625619	11625834	-
AT3TE48335	Chr3	11627235	11627479	-
AT3TE48350	Chr3	11632227	11632458	+
AT3TE48365	Chr3	11634011	11639062	+
AT3TE48370	Chr3	11639062	11639517	-
AT3TE48380	Chr3	11640168	11641612	+
AT3TE48405	Chr3	11642950	11644141	+
AT3TE48465	Chr3	11657864	11660632	-
AT3TE48510	Chr3	11674940	11675948	-
AT3TE48525	Chr3	11678189	11678764	+
AT3TE48615	Chr3	11704284	11704564	+
AT3TE48630	Chr3	11705078	11705307	+
AT3TE48670	Chr3	11707176	11707506	+
AT3TE48685	Chr3	11707933	11708263	+
AT3G29796	Chr3	11708561	11713028	+
AT3TE48720	Chr3	11710169	11710499	+
AT3TE48735	Chr3	11710923	11711253	+
AT3TE48750	Chr3	11711843	11712232	-
AT3TE48765	Chr3	11713730	11714166	-
AT3TE48770	Chr3	11714166	11715294	-
AT3TE48825	Chr3	11723023	11724227	-
AT3TE48840	Chr3	11726288	11727555	+
AT3TE48890	Chr3	11740972	11741561	-
AT3TE48905	Chr3	11743224	11744059	+
AT3TE49000	Chr3	11766710	11768299	-
AT3TE49055	Chr3	11783808	11784573	-
AT3TE49090	Chr3	11793558	11798454	+
AT3G30165	Chr3	11797730	11798191	-
AT3TE49110	Chr3	11800779	11801357	+
AT3TE49170	Chr3	11815772	11816971	+
AT3TE49190	Chr3	11821684	11822626	+
AT3TE49195	Chr3	11822626	11823035	+
TEM3931	Chr3	11832999	11834418	+
AT3TE49325	Chr3	11851924	11852741	-
AT3TE49330	Chr3	11852742	11853069	+
AT3TE49355	Chr3	11856699	11858051	+
AT3TE49360	Chr3	11858051	11859203	+
AT3TE49365	Chr3	11859218	11859835	+
AT3TE49375	Chr3	11860052	11860297	-
AT3TE49390	Chr3	11862335	11862827	+
AT3TE49415	Chr3	11868682	11869883	-
AT3TE49510	Chr3	11890640	11892103	+
AT3TE49530	Chr3	11896223	11896854	-
AT3TE49535	Chr3	11898255	11899184	+
AT3TE49540	Chr3	11899788	11900078	-
AT3TE49545	Chr3	11900078	11901962	+
AT3TE49645	Chr3	11926374	11926777	+
AT3TE49660	Chr3	11927923	11928407	+
AT3TE49685	Chr3	11931314	11932095	-
AT3TE49715	Chr3	11937545	11939163	+
AT3TE49815	Chr3	11962867	11963372	-
AT3TE49820	Chr3	11963372	11964161	+
AT3TE49850	Chr3	11969574	11970807	+
TEM3952	Chr3	11971963	11973463	+
AT3TE49895	Chr3	11980026	11981097	+
[truncated: 1,808 more rows]

## Sheet: DRM_TEs
TE_ID	chromosome	start	end	direction
TEM0001	Chr1	1	1323	+
TEM0003	Chr1	42256	42563	+
TEM0004	Chr1	44581	44996	+
AT1TE00150	Chr1	55675	56576	+
AT1TE00825	Chr1	256074	256920	-
TEM0013	Chr1	372401	372805	+
AT1TE01370	Chr1	422673	424055	+
AT1TE01665	Chr1	512692	513136	-
AT1TE01750	Chr1	540416	540985	-
AT1TE01755	Chr1	540985	541195	-
TEM0021	Chr1	549529	550868	+
AT1TE01810	Chr1	559301	559557	+
AT1TE01910	Chr1	587409	588054	-
AT1TE02060	Chr1	634245	634464	+
AT1TE02075	Chr1	639129	641133	+
AT1TE02265	Chr1	696446	697372	-
AT1TE02270	Chr1	697386	697951	+
AT1TE02540	Chr1	781193	782748	-
AT1TE02560	Chr1	784929	785447	+
TEM0031	Chr1	791499	792537	+
AT1TE02690	Chr1	821946	822571	-
TEM0033	Chr1	888710	889555	+
AT1TE03785	Chr1	1160068	1161330	+
TEM0039	Chr1	1249731	1250965	+
AT1TE04165	Chr1	1275794	1276621	-
TEM0042	Chr1	1288983	1289511	+
AT1TE04830	Chr1	1476477	1476716	+
AT1TE05485	Chr1	1676363	1677158	+
AT1TE05585	Chr1	1705374	1706660	+
TEM0060	Chr1	1881827	1882330	+
TEM0065	Chr1	2340149	2340525	+
AT1TE07880	Chr1	2415019	2416036	+
AT1TE08050	Chr1	2472645	2473098	-
AT1TE08660	Chr1	2657417	2657920	+
AT1G09260	Chr1	2993381	2993820	+
AT1TE10560	Chr1	3250578	3251485	+
AT1TE11565	Chr1	3551135	3552618	-
AT1TE12230	Chr1	3761902	3762819	+
AT1TE12275	Chr1	3771002	3772133	-
AT1TE12720	Chr1	3910026	3910701	-
TEM0102	Chr1	3919897	3920226	+
TEM0104	Chr1	3932870	3933514	+
TEM0105	Chr1	3979820	3980905	+
AT1G11785	Chr1	3979823	3981079	-
TEM0111	Chr1	4326408	4326667	+
TEM0115	Chr1	4439849	4440085	+
TEM0117	Chr1	4525109	4525607	+
AT1TE14865	Chr1	4582382	4583615	+
AT1TE15510	Chr1	4785273	4787837	+
TEM0129	Chr1	4860265	4860677	+
AT1TE16325	Chr1	5044605	5045303	+
TEM0133	Chr1	5055758	5056319	+
TEM0135	Chr1	5171806	5172196	+
AT1TE16810	Chr1	5197904	5198865	+
TEM0137	Chr1	5285015	5285541	+
TEM0139	Chr1	5356772	5357150	+
TEM0141	Chr1	5389622	5389937	+
AT1TE17415	Chr1	5391426	5392691	+
AT1TE17555	Chr1	5436720	5437872	-
AT1TE18285	Chr1	5657320	5657736	-
AT1TE19285	Chr1	5965475	5967002	-
AT1TE19635	Chr1	6074607	6075608	+
AT1TE19730	Chr1	6102454	6103091	+
AT1TE19795	Chr1	6122862	6123448	-
TEM0164	Chr1	6173172	6173592	+
AT1TE20035	Chr1	6196418	6197401	+
AT1TE20040	Chr1	6198002	6199615	-
AT1TE20110	Chr1	6218530	6219237	-
AT1TE20180	Chr1	6233920	6235720	-
AT1TE20195	Chr1	6236274	6237764	+
AT1G18193	Chr1	6262602	6263258	+
AT1TE20665	Chr1	6378718	6379470	+
AT1TE20745	Chr1	6402869	6403656	-
AT1TE20755	Chr1	6403763	6405272	-
TEM0175	Chr1	6425890	6426559	+
TEM0178	Chr1	6472607	6473373	+
AT1TE21305	Chr1	6573463	6574189	+
AT1TE21370	Chr1	6593172	6594618	+
TEM0185	Chr1	6615303	6615752	+
AT1TE21515	Chr1	6640486	6640989	-
AT1TE21575	Chr1	6661662	6662494	+
TEM0190	Chr1	6717860	6718311	+
TEM0191	Chr1	6720791	6721095	+
TEM0192	Chr1	6722927	6723522	+
AT1TE21790	Chr1	6735678	6737670	+
AT1TE23080	Chr1	7138401	7139137	+
AT1TE23390	Chr1	7241159	7241362	+
AT1TE23395	Chr1	7241362	7241617	+
AT1TE23505	Chr1	7281533	7284779	+
TEM0213	Chr1	7365484	7366064	+
AT1TE23830	Chr1	7392260	7392513	+
TEM0220	Chr1	7541117	7541515	+
TEM0221	Chr1	7604803	7605061	+
TEM0222	Chr1	7665391	7665863	+
AT1TE25115	Chr1	7810370	7812003	-
AT1TE25210	Chr1	7833185	7834254	-
TEM0239	Chr1	7936589	7936871	+
AT1TE25655	Chr1	7975861	7976602	-
AT1TE25685	Chr1	7985125	7986420	+
AT1TE25880	Chr1	8043907	8044269	-
TEM0249	Chr1	8154178	8154439	+
AT1TE26305	Chr1	8169558	8170783	+
TEM0254	Chr1	8201041	8201656	+
TEM0258	Chr1	8254729	8255185	+
AT1TE26625	Chr1	8266506	8267531	-
AT1TE26630	Chr1	8267531	8267856	-
TEM0260	Chr1	8272320	8273075	+
AT1TE27030	Chr1	8374634	8375371	+
AT1TE27335	Chr1	8471416	8472049	-
AT1TE27340	Chr1	8472049	8473869	+
AT1TE27350	Chr1	8476058	8476379	+
AT1TE27475	Chr1	8515351	8515706	-
AT1TE27540	Chr1	8538080	8538854	-
TEM0280	Chr1	8543795	8544021	+
AT1TE27655	Chr1	8573145	8573496	-
AT1TE27665	Chr1	8576450	8578073	-
AT1TE27675	Chr1	8578073	8578425	-
AT1TE27810	Chr1	8620663	8624017	-
AT1TE27830	Chr1	8622246	8623616	-
AT1TE27915	Chr1	8649241	8649670	+
TEM0288	Chr1	8681910	8682137	+
TEM0290	Chr1	8723083	8723601	+
AT1TE29265	Chr1	9082621	9082919	+
AT1TE29410	Chr1	9135711	9136880	-
AT1TE29415	Chr1	9135756	9136720	-
AT1TE29420	Chr1	9136880	9137784	-
TEM0319	Chr1	9174186	9174639	+
AT1TE29770	Chr1	9235932	9237369	-
AT1TE30130	Chr1	9353785	9354276	-
AT1TE30240	Chr1	9384159	9385031	-
AT1TE30410	Chr1	9432182	9432422	+
AT1TE30770	Chr1	9547196	9551187	-
AT1TE30890	Chr1	9585964	9587249	-
TEM0345	Chr1	9626620	9627175	+
TEM0349	Chr1	9746390	9746642	+
TEM0353	Chr1	9778345	9778734	+
AT1G28135	Chr1	9829261	9829584	+
AT1TE31660	Chr1	9836130	9837644	-
AT1TE31710	Chr1	9853585	9854513	+
AT1TE31750	Chr1	9862696	9863641	+
AT1TE31770	Chr1	9865345	9865642	-
TEM0362	Chr1	9883807	9884157	+
AT1TE31985	Chr1	9918157	9919330	-
TEM0368	Chr1	9925135	9926169	+
AT1TE32040	Chr1	9939336	9939673	+
TEM0374	Chr1	10013087	10013621	+
AT1TE32455	Chr1	10060619	10060876	-
AT1TE32795	Chr1	10160998	10161600	+
AT1TE32945	Chr1	10206712	10207010	-
AT1TE32990	Chr1	10221013	10221279	+
AT1TE32995	Chr1	10221754	10222388	-
AT1TE33075	Chr1	10239320	10240195	+
AT1TE33905	Chr1	10490333	10491121	-
AT1TE33955	Chr1	10506500	10507368	-
TEM0400	Chr1	10512628	10513062	+
AT1TE34125	Chr1	10554478	10555084	-
AT1TE34180	Chr1	10570148	10570425	+
AT1TE34215	Chr1	10579208	10580491	+
AT1TE34255	Chr1	10591369	10591988	-
AT1TE34295	Chr1	10597340	10598621	-
AT1TE34365	Chr1	10623649	10624994	-
AT1TE34450	Chr1	10654143	10654665	-
AT1TE34590	Chr1	10702614	10703021	-
TEM0424	Chr1	10801222	10801513	+
TEM0426	Chr1	10814243	10814506	+
AT1TE35100	Chr1	10866668	10867813	-
AT1TE35105	Chr1	10867088	10867731	-
AT1TE35290	Chr1	10924715	10924942	-
AT1TE35380	Chr1	10949475	10950410	-
AT1TE35530	Chr1	11005735	11006300	+
AT1TE35535	Chr1	11006301	11006531	+
AT1TE35575	Chr1	11016005	11016462	+
AT1TE35590	Chr1	11019473	11020246	-
TEM0446	Chr1	11083017	11083270	+
AT1TE35820	Chr1	11088841	11089308	-
TEM0451	Chr1	11117404	11117845	+
TEM0453	Chr1	11128973	11129294	+
TEM0454	Chr1	11131531	11132399	+
AT1TE36060	Chr1	11153316	11156607	-
AT1TE36120	Chr1	11174212	11175268	+
AT1TE36255	Chr1	11212271	11212543	+
TEM0462	Chr1	11228605	11228856	+
TEM0463	Chr1	11230403	11230704	+
AT1TE36345	Chr1	11241566	11241774	-
AT1TE36350	Chr1	11241774	11242082	+
TEM0465	Chr1	11259078	11259742	+
TEM0466	Chr1	11276748	11277316	+
AT1TE36505	Chr1	11282851	11284969	-
AT1TE36550	Chr1	11298444	11299452	+
AT1TE36890	Chr1	11406654	11410513	-
AT1TE36945	Chr1	11422070	11422450	-
AT1TE36960	Chr1	11427690	11428401	-
TEM0482	Chr1	11440952	11441563	+
AT1TE37170	Chr1	11490271	11491439	+
AT1TE37180	Chr1	11492840	11493647	-
AT1TE37305	Chr1	11525686	11527099	-
AT1TE37310	Chr1	11527100	11527603	-
AT1TE37390	Chr1	11550281	11551141	+
AT1TE37645	Chr1	11631745	11632526	+
AT1TE37660	Chr1	11636076	11637042	+
AT1TE37705	Chr1	11647425	11648912	+
AT1TE37710	Chr1	11648913	11649897	+
AT1TE37715	Chr1	11649912	11650225	+
AT1TE37770	Chr1	11666452	11666871	-
AT1TE37790	Chr1	11669319	11670243	-
AT1TE37890	Chr1	11699257	11701926	+
AT1TE37905	Chr1	11703840	11704294	-
AT1TE37975	Chr1	11720280	11722435	+
AT1TE38015	Chr1	11732354	11732947	+
AT1TE38195	Chr1	11782552	11783489	-
AT1TE38250	Chr1	11804092	11804334	-
TEM0525	Chr1	11805005	11805422	+
AT1TE38260	Chr1	11805614	11806799	-
TEM0527	Chr1	11807646	11808268	+
TEM0529	Chr1	11822085	11822618	+
AT1TE38345	Chr1	11834650	11834922	+
TEM0533	Chr1	11857033	11857652	+
TEM0535	Chr1	11859541	11860038	+
AT1TE38445	Chr1	11861676	11861876	+
TEM0538	Chr1	11879695	11880949	+
TEM0541	Chr1	11934895	11935202	+
AT1TE38775	Chr1	11979620	11982674	+
AT1TE38835	Chr1	11990878	11992997	+
AT1TE38915	Chr1	12012508	12013095	-
AT1TE38920	Chr1	12013095	12013397	+
TEM0556	Chr1	12059832	12060607	+
AT1TE39165	Chr1	12084208	12084743	+
AT1TE39215	Chr1	12097187	12097457	+
AT1TE39225	Chr1	12097550	12098275	+
AT1TE39360	Chr1	12136633	12137681	-
AT1TE39365	Chr1	12137682	12137978	-
TEM0571	Chr1	12214992	12215281	+
TEM0572	Chr1	12218523	12219132	+
AT1TE39720	Chr1	12230816	12231359	-
AT1TE39755	Chr1	12240469	12241280	+
AT1TE39820	Chr1	12257209	12257975	+
AT1TE39885	Chr1	12276388	12276648	-
AT1TE40000	Chr1	12300214	12300968	-
AT1TE40010	Chr1	12302962	12303213	+
AT1TE40075	Chr1	12324806	12325818	+
AT1TE40120	Chr1	12333648	12338510	+
AT1TE40295	Chr1	12387694	12388109	+
AT1TE40305	Chr1	12389720	12390060	+
TEM0604	Chr1	12391353	12391795	+
TEM0607	Chr1	12435029	12435509	+
AT1TE40470	Chr1	12440220	12440987	-
AT1TE40520	Chr1	12457431	12457684	+
AT1TE40525	Chr1	12457685	12458343	+
AT1TE40620	Chr1	12476769	12478196	+
AT1TE40690	Chr1	12500394	12501185	-
AT1TE40770	Chr1	12525577	12526506	+
AT1TE40800	Chr1	12529447	12530215	-
AT1TE40870	Chr1	12547959	12548355	+
AT1TE41025	Chr1	12592610	12592835	-
AT1TE41080	Chr1	12603509	12603905	-
AT1TE41140	Chr1	12614601	12615151	-
AT1TE41170	Chr1	12618546	12619858	+
AT1TE41185	Chr1	12620343	12621890	-
AT1TE41250	Chr1	12633185	12633406	+
AT1TE41260	Chr1	12633624	12636327	+
AT1TE41265	Chr1	12636327	12636722	+
AT1TE41390	Chr1	12692263	12692502	-
AT1TE41525	Chr1	12738312	12740004	-
TEM0658	Chr1	12869138	12869591	+
AT1TE41905	Chr1	12872949	12876830	+
AT1TE41980	Chr1	12894687	12895316	+
AT1TE41985	Chr1	12894922	12895203	-
AT1TE41995	Chr1	12895316	12896538	-
AT1TE42255	Chr1	12961829	12962163	-
AT1TE42315	Chr1	12976098	12976857	-
AT1TE42335	Chr1	12980300	12980537	-
AT1TE42370	Chr1	12992996	12993612	-
AT1TE42430	Chr1	13015326	13017802	+
AT1TE42550	Chr1	13036816	13037383	-
AT1TE42600	Chr1	13049862	13050128	+
AT1TE42660	Chr1	13063769	13065302	-
AT1TE42700	Chr1	13075526	13076517	-
TEM0701	Chr1	13104817	13105193	+
AT1TE42835	Chr1	13114226	13114833	-
TEM0707	Chr1	13129948	13130569	+
AT1TE42935	Chr1	13155541	13156291	+
AT1TE42965	Chr1	13164661	13165419	+
AT1TE43150	Chr1	13213580	13214177	-
AT1TE43170	Chr1	13215104	13216190	+
AT1TE43190	Chr1	13220037	13220432	+
AT1TE43195	Chr1	13220433	13220665	-
AT1TE43530	Chr1	13313433	13314041	-
AT1TE43615	Chr1	13342810	13343440	-
AT1TE43635	Chr1	13345720	13347477	-
AT1TE43690	Chr1	13355890	13357161	+
TEM0743	Chr1	13463267	13463713	+
AT1TE44385	Chr1	13565365	13566361	+
AT1TE44395	Chr1	13566471	13568163	-
AT1TE44470	Chr1	13581894	13582929	+
AT1TE44475	Chr1	13582929	13583578	+
AT1TE44485	Chr1	13584483	13585600	+
TEM0753	Chr1	13590930	13591372	+
AT1TE44730	Chr1	13668180	13669232	+
AT1TE44750	Chr1	13671168	13671663	-
AT1TE44795	Chr1	13686650	13687570	+
AT1TE45265	Chr1	13810903	13811477	-
TEM0776	Chr1	14000395	14000659	+
TEM0778	Chr1	14002627	14003270	+
AT1TE46485	Chr1	14152940	14153264	+
TEM0788	Chr1	14164155	14165023	+
AT1TE46520	Chr1	14165866	14166066	+
AT1TE46915	Chr1	14296179	14296518	-
AT1TE46925	Chr1	14296549	14297935	-
AT1TE46950	Chr1	14298785	14300271	-
AT1TE47005	Chr1	14308460	14309469	-
AT1TE51515	Chr1	15642413	15643368	+
AT1TE51785	Chr1	15729564	15729926	+
AT1TE52310	Chr1	15890199	15891183	+
AT1TE52320	Chr1	15890691	15890925	+
AT1TE52520	Chr1	15935439	15935710	+
AT1TE52550	Chr1	15944858	15945882	-
AT1TE53275	Chr1	16164704	16165296	-
AT1TE53545	Chr1	16259818	16260357	+
AT1TE53560	Chr1	16261097	16262552	+
AT1TE53565	Chr1	16262552	16262928	+
AT1TE53790	Chr1	16340750	16341752	-
AT1TE54035	Chr1	16403602	16403859	+
AT1TE54320	Chr1	16467477	16467772	+
AT1TE54375	Chr1	16478045	16478334	-
AT1TE54675	Chr1	16592562	16593740	-
TEM0862	Chr1	16645732	16646131	+
AT1TE55115	Chr1	16702565	16702962	-
AT1TE55135	Chr1	16705921	16706785	-
AT1TE55155	Chr1	16709856	16710251	+
AT1TE55190	Chr1	16711508	16712044	+
AT1TE55425	Chr1	16773498	16773744	+
AT1TE55530	Chr1	16792056	16792439	-
AT1TE55590	Chr1	16806150	16807920	+
TEM0888	Chr1	16810691	16811026	+
AT1TE55645	Chr1	16822305	16822848	+
AT1TE55670	Chr1	16824109	16827463	+
AT1TE55675	Chr1	16827473	16828789	-
AT1TE55685	Chr1	16829454	16829679	+
AT1TE55805	Chr1	16858518	16859160	-
AT1TE55810	Chr1	16859160	16860639	-
AT1TE55850	Chr1	16866614	16867298	-
TEM0903	Chr1	16870143	16871143	+
AT1TE55880	Chr1	16877044	16877543	-
AT1TE55925	Chr1	16889133	16890972	-
TEM0909	Chr1	16891853	16892217	+
AT1TE55955	Chr1	16896031	16896642	-
TEM0911	Chr1	16899379	16899856	+
AT1TE55985	Chr1	16903430	16906912	+
AT1TE56040	Chr1	16925673	16926338	-
AT1TE56055	Chr1	16929969	16930548	-
AT1TE56090	Chr1	16935740	16936348	-
AT1TE56110	Chr1	16938113	16939142	-
AT1TE56205	Chr1	16974797	16975428	+
AT1TE56345	Chr1	17011768	17012077	+
AT1TE56480	Chr1	17064419	17065248	+
AT1TE56500	Chr1	17069791	17070028	-
AT1TE56515	Chr1	17076897	17077303	-
TEM0938	Chr1	17091437	17092392	+
AT1TE56585	Chr1	17101875	17103933	+
TEM0947	Chr1	17178671	17179145	+
AT1TE56940	Chr1	17186922	17187271	-
AT1TE57235	Chr1	17267054	17268180	+
TEM0962	Chr1	17288671	17289761	+
AT1TE57315	Chr1	17295328	17295546	-
TEM0967	Chr1	17305680	17306335	+
AT1G47265	Chr1	17324318	17324911	+
AT1TE57440	Chr1	17332479	17333420	-
TEM0971	Chr1	17335300	17335701	+
TEM0976	Chr1	17368999	17369855	+
AT1TE57560	Chr1	17376312	17378567	-
AT1TE57565	Chr1	17381433	17381809	-
AT1TE57710	Chr1	17415477	17416206	+
TEM0986	Chr1	17418404	17418676	+
TEM0988	Chr1	17440212	17440804	+
TEM0989	Chr1	17441190	17441797	+
AT1TE57815	Chr1	17447859	17448067	-
AT1TE57820	Chr1	17448067	17449699	-
AT1TE57885	Chr1	17465433	17466502	+
TEM0994	Chr1	17506920	17507453	+
AT1TE58255	Chr1	17556116	17556768	-
TEM1001	Chr1	17560797	17561571	+
AT1TE58290	Chr1	17563198	17563852	+
AT1TE58310	Chr1	17565829	17566111	-
AT1TE58345	Chr1	17576129	17577445	-
AT1TE58445	Chr1	17607200	17607973	+
AT1TE58525	Chr1	17632374	17633144	+
TEM1016	Chr1	17638766	17639645	+
AT1TE58600	Chr1	17652364	17652923	-
AT1TE58650	Chr1	17665029	17666250	-
AT1TE58655	Chr1	17666250	17666684	-
AT1TE58725	Chr1	17685243	17686629	-
AT1TE58820	Chr1	17708149	17710775	+
AT1TE59155	Chr1	17819844	17821266	-
AT1TE59195	Chr1	17831151	17831580	+
AT1TE59230	Chr1	17840570	17840805	-
TEM1041	Chr1	17862978	17863350	+
AT1TE59320	Chr1	17873885	17874352	+
AT1TE59400	Chr1	17899006	17899245	+
AT1TE59660	Chr1	17976639	17977598	+
AT1TE59670	Chr1	17978756	17979423	-
AT1TE59765	Chr1	18019679	18019944	+
TEM1057	Chr1	18047917	18048510	+
AT1TE59875	Chr1	18055830	18056097	-
AT1TE60000	Chr1	18096128	18096961	-
TEM1062	Chr1	18110795	18111362	+
AT1G48953	Chr1	18110814	18111463	-
TEM1063	Chr1	18126614	18127077	+
TEM1064	Chr1	18130185	18131149	+
TEM1069	Chr1	18211453	18211823	+
AT1TE60345	Chr1	18214248	18214616	+
AT1TE60545	Chr1	18270463	18271031	-
AT1TE60585	Chr1	18281069	18282150	-
AT1TE60630	Chr1	18297467	18297687	-
AT1TE60740	Chr1	18324371	18326405	+
TEM1082	Chr1	18341966	18342226	+
AT1TE61055	Chr1	18420692	18421416	-
AT1TE61110	Chr1	18437208	18438136	+
AT1TE61145	Chr1	18449114	18450393	-
AT1TE61295	Chr1	18493711	18494035	+
TEM1095	Chr1	18549379	18549647	+
AT1TE61465	Chr1	18551538	18552259	-
AT1TE61480	Chr1	18553122	18553622	-
AT1TE61485	Chr1	18553622	18553842	+
AT1TE61565	Chr1	18579496	18580199	+
AT1TE61630	Chr1	18598975	18599359	+
AT1TE61660	Chr1	18605157	18606513	-
AT1TE61735	Chr1	18626813	18627361	+
AT1TE61795	Chr1	18643653	18644174	-
TEM1110	Chr1	18698383	18698634	+
AT1TE62200	Chr1	18765891	18766872	-
AT1TE62215	Chr1	18767011	18768116	-
AT1TE62220	Chr1	18768116	18770603	-
AT1TE62335	Chr1	18804534	18805133	-
AT1TE62415	Chr1	18817595	18818027	+
AT1TE62530	Chr1	18873929	18874466	-
AT1TE62565	Chr1	18888152	18888427	-
AT1TE62865	Chr1	18980599	18981376	-
AT1TE62935	Chr1	18999513	18999947	+
AT1TE63135	Chr1	19053992	19054422	-
AT1TE63140	Chr1	19054422	19056104	+
AT1TE63145	Chr1	19056104	19056564	+
AT1TE63240	Chr1	19084553	19086291	+
AT1TE63255	Chr1	19086473	19087248	+
AT1TE63440	Chr1	19145623	19146253	-
AT1TE63560	Chr1	19180203	19180740	-
AT1TE63615	Chr1	19198195	19198428	+
TEM1150	Chr1	19226295	19226702	+
AT1TE63745	Chr1	19236618	19237400	-
AT1TE63950	Chr1	19291506	19292829	-
AT1TE64070	Chr1	19330142	19330778	+
AT1TE64105	Chr1	19352907	19353478	-
AT1TE64110	Chr1	19353478	19354354	-
AT1TE64210	Chr1	19389527	19389869	-
AT1TE64240	Chr1	19391784	19395117	-
AT1TE64250	Chr1	19395209	19395565	+
TEM1174	Chr1	19398175	19398873	+
AT1TE64275	Chr1	19403368	19403645	-
AT1TE64280	Chr1	19403933	19404711	+
AT1TE64325	Chr1	19420288	19420950	+
TEM1179	Chr1	19424726	19425256	+
AT1TE64340	Chr1	19426503	19427034	-
AT1TE64350	Chr1	19428402	19428848	-
TEM1186	Chr1	19497696	19498179	+
AT1TE64930	Chr1	19630260	19630861	+
AT1TE65005	Chr1	19654970	19655716	-
AT1TE65085	Chr1	19693216	19693478	-
AT1TE65110	Chr1	19703140	19704372	+
AT1TE65115	Chr1	19704372	19705615	+
AT1TE65160	Chr1	19716455	19719259	+
AT1TE65165	Chr1	19717820	19718604	+
AT1TE65185	Chr1	19724638	19725068	+
AT1TE65235	Chr1	19736159	19736534	+
AT1TE65250	Chr1	19741471	19742139	-
AT1TE65255	Chr1	19743665	19744386	-
AT1TE65280	Chr1	19749259	19749851	+
TEM1212	Chr1	19861317	19861651	+
AT1TE65810	Chr1	19908864	19909195	-
AT1TE66090	Chr1	19993686	19995733	-
TEM1223	Chr1	20024149	20024984	+
AT1G53655	Chr1	20032703	20033724	+
TEM1228	Chr1	20115360	20115693	+
TEM1231	Chr1	20126518	20126987	+
TEM1232	Chr1	20127898	20128432	+
AT1TE66570	Chr1	20153633	20154352	+
AT1TE66575	Chr1	20154053	20154314	+
AT1TE66615	Chr1	20166498	20167335	-
AT1TE66620	Chr1	20167335	20167552	-
AT1TE66645	Chr1	20172728	20173718	+
AT1TE66725	Chr1	20194005	20194456	-
AT1TE66730	Chr1	20194456	20194818	-
AT1TE66770	Chr1	20205352	20206079	-
TEM1243	Chr1	20207985	20208378	+
AT1TE66850	Chr1	20226441	20226747	+
AT1TE67005	Chr1	20278142	20278823	+
AT1TE67280	Chr1	20362627	20362952	-
AT1TE67290	Chr1	20367161	20367525	+
TEM1253	Chr1	20403122	20403603	+
AT1TE67485	Chr1	20432898	20433301	+
AT1G54775	Chr1	20437784	20438014	-
AT1TE67670	Chr1	20488674	20490263	+
AT1TE67695	Chr1	20492479	20492875	-
AT1TE67755	Chr1	20508541	20509420	-
AT1TE67785	Chr1	20513637	20514607	+
AT1TE67800	Chr1	20519723	20521099	+
AT1TE67805	Chr1	20520391	20520598	+
TEM1268	Chr1	20524959	20525675	+
AT1TE67920	Chr1	20559589	20560402	-
TEM1272	Chr1	20564919	20565265	+
TEM1273	Chr1	20569093	20569339	+
TEM1275	Chr1	20624857	20625997	+
AT1TE68320	Chr1	20687244	20687834	+
AT1TE68355	Chr1	20696827	20697332	-
AT1TE68365	Chr1	20699803	20700043	+
TEM1281	Chr1	20703833	20704698	+
TEM1283	Chr1	20734094	20734434	+
TEM1287	Chr1	20799293	20799968	+
AT1TE68760	Chr1	20819585	20821227	+
AT1TE68775	Chr1	20823686	20825199	+
TEM1291	Chr1	20859828	20860282	+
AT1TE69070	Chr1	20914031	20914274	-
AT1TE69495	Chr1	21042268	21042929	-
AT1TE69560	Chr1	21066230	21066452	-
AT1TE69565	Chr1	21066909	21067588	+
AT1TE69720	Chr1	21104859	21105188	-
AT1TE69745	Chr1	21106909	21107725	-
AT1TE69835	Chr1	21127989	21128869	+
AT1TE69860	Chr1	21131907	21132147	+
AT1TE69900	Chr1	21144655	21144913	-
AT1TE69990	Chr1	21172520	21173360	-
AT1TE70100	Chr1	21209686	21211361	-
AT1TE70105	Chr1	21211545	21211881	-
TEM1320	Chr1	21230443	21231127	+
AT1TE70230	Chr1	21260146	21261030	+
TEM1327	Chr1	21311709	21312005	+
AT1TE70470	Chr1	21335893	21336605	+
AT1TE70520	Chr1	21359986	21360536	+
AT1TE70600	Chr1	21387932	21389492	-
AT1G57775	Chr1	21399618	21400150	-
AT1TE70645	Chr1	21400668	21401371	+
AT1G57777	Chr1	21401235	21401798	-
TEM1341	Chr1	21448527	21448929	+
TEM1343	Chr1	21462741	21463157	+
AT1TE70985	Chr1	21507772	21508044	+
AT1TE70995	Chr1	21509600	21510092	+
AT1TE71275	Chr1	21601922	21602156	-
AT1TE71305	Chr1	21609619	21609904	+
AT1TE71415	Chr1	21640520	21640771	-
AT1TE71825	Chr1	21756999	21758625	-
TEM1373	Chr1	21766285	21766720	+
TEM1376	Chr1	21784868	21785283	+
AT1TE71915	Chr1	21786756	21787461	+
TEM1380	Chr1	21802598	21803073	+
TEM1383	Chr1	21821129	21821498	+
AT1TE72020	Chr1	21823013	21823719	+
TEM1387	Chr1	21838856	21839278	+
AT1TE72165	Chr1	21872178	21872788	+
AT1TE72325	Chr1	21918285	21919763	+
AT1TE72630	Chr1	21995403	21996608	+
TEM1404	Chr1	22067457	22067915	+
AT1TE72930	Chr1	22089250	22089743	+
AT1TE73010	Chr1	22111958	22112753	+
AT1TE73260	Chr1	22182645	22183141	-
AT1TE73345	Chr1	22206450	22208079	+
AT1TE73400	Chr1	22224561	22224825	-
TEM1420	Chr1	22260919	22261667	+
TEM1421	Chr1	22269498	22270437	+
AT1TE73865	Chr1	22376084	22376877	+
TEM1427	Chr1	22443428	22443904	+
TEM1428	Chr1	22447370	22447712	+
TEM1431	Chr1	22459513	22459739	+
AT1TE74180	Chr1	22482658	22483139	-
AT1TE74430	Chr1	22562684	22563702	-
AT1G61200	Chr1	22562811	22563577	-
AT1TE74530	Chr1	22592371	22593721	-
TEM1439	Chr1	22618224	22618616	+
TEM1443	Chr1	22731991	22732647	+
AT1TE75075	Chr1	22777307	22777670	-
AT1TE75240	Chr1	22828395	22828602	-
AT1TE75245	Chr1	22828602	22829372	+
AT1TE75290	Chr1	22844697	22845235	-
AT1TE75350	Chr1	22855427	22855824	-
TEM1457	Chr1	22887843	22888500	+
AT1TE75445	Chr1	22889077	22889452	-
TEM1459	Chr1	22890461	22890807	+
TEM1464	Chr1	23033023	23034521	+
TEM1465	Chr1	23068041	23068633	+
AT1TE76110	Chr1	23093712	23094066	-
AT1TE76130	Chr1	23096072	23097785	-
AT1TE76235	Chr1	23125125	23125808	-
TEM1473	Chr1	23140537	23141274	+
AT1TE76310	Chr1	23149768	23149995	+
AT1TE76325	Chr1	23152827	23153329	-
TEM1477	Chr1	23164811	23165295	+
TEM1479	Chr1	23190687	23191128	+
AT1TE76470	Chr1	23197418	23197681	-
AT1TE76630	Chr1	23247298	23247895	+
AT1TE76850	Chr1	23321141	23322080	-
AT1TE77135	Chr1	23424034	23425021	-
AT1TE77150	Chr1	23430954	23431563	-
AT1TE77410	Chr1	23509590	23509833	+
AT1TE77560	Chr1	23553588	23554635	-
AT1TE77600	Chr1	23566325	23566585	-
AT1TE77760	Chr1	23613635	23614326	-
AT1TE77880	Chr1	23651610	23652016	-
TEM1511	Chr1	23734946	23735287	+
AT1TE78505	Chr1	23856453	23857302	+
AT1TE78515	Chr1	23861853	23862339	-
AT1TE78555	Chr1	23875269	23875670	-
AT1TE78595	Chr1	23885396	23885978	+
TEM1521	Chr1	23906969	23907381	+
AT1TE78715	Chr1	23925094	23925649	-
AT1TE78765	Chr1	23939917	23940948	-
AT1TE79030	Chr1	24027108	24027951	+
AT1TE79070	Chr1	24041682	24041997	+
AT1TE79310	Chr1	24119128	24119434	-
AT1TE79660	Chr1	24223222	24223479	-
AT1TE79720	Chr1	24241062	24241693	+
TEM1543	Chr1	24291085	24291975	+
AT1TE79940	Chr1	24317403	24317613	+
AT1TE80350	Chr1	24467556	24468241	+
AT1TE80410	Chr1	24484053	24484762	+
TEM1562	Chr1	24487907	24488465	+
AT1TE80590	Chr1	24533501	24535062	+
AT1TE80655	Chr1	24553577	24554047	-
AT1TE80725	Chr1	24577177	24577413	-
AT1TE80770	Chr1	24593075	24593605	-
AT1TE80950	Chr1	24645065	24646116	+
AT1TE81045	Chr1	24675704	24676037	-
TEM1582	Chr1	24714591	24714879	+
AT1TE81220	Chr1	24724642	24725465	+
AT1TE81275	Chr1	24741045	24742542	-
AT1TE81285	Chr1	24744925	24745330	+
AT1TE81690	Chr1	24871533	24872092	+
AT1TE81785	Chr1	24893994	24894518	-
AT1TE81795	Chr1	24897070	24897486	-
AT1TE81800	Chr1	24897486	24897699	-
AT1TE81950	Chr1	24948087	24948353	-
TEM1610	Chr1	25005611	25006011	+
AT1TE82410	Chr1	25097890	25099159	+
TEM1618	Chr1	25203827	25204135	+
TEM1619	Chr1	25217073	25217473	+
AT1TE82840	Chr1	25245300	25245742	-
AT1TE82845	Chr1	25247502	25248117	-
AT1TE82850	Chr1	25247589	25247851	+
TEM1638	Chr1	25536462	25536803	+
AT1TE83945	Chr1	25594250	25594966	+
TEM1644	Chr1	25609855	25610219	+
AT1TE84000	Chr1	25613311	25613735	-
AT1TE84185	Chr1	25675396	25675909	-
AT1TE84245	Chr1	25696500	25698524	+
AT1TE84330	Chr1	25722045	25722565	-
AT1TE84350	Chr1	25728311	25728788	+
AT1TE84365	Chr1	25729737	25730188	-
TEM1660	Chr1	25879393	25879749	+
AT1TE84860	Chr1	25896475	25896787	-
AT1TE85075	Chr1	25962303	25963306	-
TEM1664	Chr1	25973633	25974030	+
AT1TE85105	Chr1	25975950	25977038	-
TEM1667	Chr1	26083860	26084357	+
TEM1668	Chr1	26110911	26111453	+
AT1TE85640	Chr1	26139771	26140541	-
TEM1673	Chr1	26196109	26197382	+
AT1TE86175	Chr1	26306946	26307617	+
TEM1678	Chr1	26343501	26344639	+
AT1TE86330	Chr1	26358798	26360000	+
AT1TE86390	Chr1	26380787	26381167	-
TEM1683	Chr1	26425636	26426019	+
AT1TE86940	Chr1	26551491	26552205	+
TEM1688	Chr1	26561180	26561529	+
AT1TE87385	Chr1	26699596	26700297	-
TEM1694	Chr1	26722237	26722531	+
TEM1701	Chr1	26956691	26956961	+
AT1TE88320	Chr1	26994133	26994627	-
AT1TE88730	Chr1	27117490	27118195	-
AT1TE88955	Chr1	27186754	27187321	-
TEM1711	Chr1	27333867	27334106	+
TEM1721	Chr1	27710497	27710703	+
AT1TE91165	Chr1	27859647	27860967	+
AT1TE91790	Chr1	28051401	28051657	+
TEM1726	Chr1	28105466	28105799	+
AT1TE92240	Chr1	28188832	28189131	+
TEM1729	Chr1	28258971	28259457	+
TEM1732	Chr1	28293266	28293577	+
AT1TE92725	Chr1	28332971	28334063	-
AT1TE92970	Chr1	28420783	28421844	+
TEM1737	Chr1	28470261	28471273	+
AT1TE93240	Chr1	28504713	28505737	+
AT1TE93300	Chr1	28522006	28522718	-
TEM1744	Chr1	28592733	28593112	+
AT1TE93910	Chr1	28703054	28703305	+
AT1TE93915	Chr1	28703305	28704766	+
TEM1746	Chr1	28706768	28707399	+
TEM1747	Chr1	28731742	28732127	+
AT1TE94070	Chr1	28749936	28750178	-
AT1TE94190	Chr1	28785404	28786355	-
AT1TE94200	Chr1	28788492	28789862	-
TEM1752	Chr1	28815543	28815945	+
TEM1755	Chr1	28843871	28844231	+
AT1TE94495	Chr1	28891347	28891935	-
AT1TE94570	Chr1	28912663	28913670	-
AT1TE94640	Chr1	28935707	28936420	+
AT1G77815	Chr1	29263348	29263650	-
TEM1769	Chr1	29305677	29305991	+
AT1TE95895	Chr1	29313049	29313596	+
AT1TE96750	Chr1	29578070	29578609	+
AT1TE97390	Chr1	29774231	29775138	-
AT1TE97605	Chr1	29840234	29841521	+
TEM1787	Chr1	29940135	29940473	+
AT1TE98075	Chr1	29984484	29984711	-
AT1TE98920	Chr1	30253650	30255513	-
TEM1796	Chr2	98509	98820	+
TEM1797	Chr2	99754	100061	+
TEM1798	Chr2	109781	110050	+
TEM1800	Chr2	122049	122261	+
AT2TE00425	Chr2	126920	128152	+
AT2TE00480	Chr2	138751	139009	-
AT2TE00535	Chr2	152015	152232	+
AT2TE00540	Chr2	152981	153199	-
TEM1807	Chr2	161165	161645	+
TEM1808	Chr2	163321	163595	+
TEM1809	Chr2	171509	172115	+
TEM1811	Chr2	178203	178766	+
AT2TE00670	Chr2	179754	180043	+
TEM1813	Chr2	183923	184817	+
AT2TE00710	Chr2	187244	187484	-
TEM1815	Chr2	202369	202908	+
TEM1818	Chr2	205183	205583	+
AT2TE00965	Chr2	238124	238646	+
AT2TE00985	Chr2	240846	241949	+
AT2TE01035	Chr2	254342	255444	-
AT2TE01075	Chr2	266135	266435	-
TEM1828	Chr2	275093	275310	+
AT2TE01205	Chr2	292730	293916	+
AT2TE01275	Chr2	305723	306044	+
AT2TE01460	Chr2	350314	350748	-
AT2TE01465	Chr2	351666	352117	-
TEM1842	Chr2	352900	353107	+
TEM1843	Chr2	362345	362663	+
AT2TE01530	Chr2	368355	368592	+
AT2TE01630	Chr2	393577	396843	-
AT2TE01650	Chr2	400078	400300	+
TEM1854	Chr2	407246	407647	+
TEM1861	Chr2	439588	439947	+
TEM1865	Chr2	449799	450231	+
AT2TE01905	Chr2	450951	451330	+
TEM1868	Chr2	465846	466112	+
TEM1869	Chr2	472271	472475	+
TEM1870	Chr2	473780	474109	+
TEM1872	Chr2	492256	492600	+
AT2TE02160	Chr2	499934	503974	+
AT2TE02190	Chr2	510652	511831	-
AT2TE02335	Chr2	542270	544756	+
AT2TE02430	Chr2	560179	560448	-
AT2TE02475	Chr2	582618	583282	+
AT2G02280	Chr2	600491	601439	-
AT2TE02595	Chr2	612657	612921	-
AT2TE02660	Chr2	625442	626028	-
AT2TE02665	Chr2	626028	626486	-
AT2TE02680	Chr2	631072	631344	+
AT2TE02710	Chr2	636878	637401	-
TEM1891	Chr2	641133	641382	+
AT2TE02950	Chr2	685813	687238	+
AT2TE02955	Chr2	686374	687108	+
AT2TE03040	Chr2	704300	704695	-
AT2TE03055	Chr2	707022	710196	+
AT2TE03075	Chr2	713305	713789	-
AT2TE03095	Chr2	714782	715390	-
AT2TE03100	Chr2	715390	716942	-
AT2TE03130	Chr2	721013	722126	+
AT2TE03135	Chr2	722126	722642	+
AT2TE03145	Chr2	723058	723482	-
AT2TE03165	Chr2	728956	729170	-
AT2TE03205	Chr2	736574	737445	-
AT2TE03270	Chr2	749205	749743	-
AT2TE03275	Chr2	749304	749560	+
AT2TE03295	Chr2	755083	755411	-
AT2TE03375	Chr2	768258	768473	+
TEM1916	Chr2	780229	780635	+
AT2TE03640	Chr2	825986	826273	+
AT2TE03875	Chr2	871078	873128	-
TEM1929	Chr2	890589	891273	+
TEM1930	Chr2	891828	892711	+
AT2TE04000	Chr2	893849	894388	-
AT2TE04090	Chr2	914341	915293	+
AT2TE04305	Chr2	963291	963521	-
TEM1940	Chr2	983735	984251	+
AT2TE04440	Chr2	993232	993503	+
AT2TE04520	Chr2	1010608	1011039	-
AT2TE04545	Chr2	1018858	1019085	-
AT2TE04580	Chr2	1027647	1028020	+
AT2TE04630	Chr2	1037743	1038911	-
AT2TE04675	Chr2	1048320	1049410	-
TEM1950	Chr2	1050131	1050575	+
AT2TE04835	Chr2	1078560	1078821	-
AT2TE04900	Chr2	1087330	1090322	+
AT2TE05015	Chr2	1111382	1111755	-
AT2TE05025	Chr2	1111809	1112230	+
AT2TE05080	Chr2	1123883	1124103	-
AT2TE05095	Chr2	1125662	1127612	-
AT2TE05170	Chr2	1142448	1142763	-
AT2TE05290	Chr2	1170282	1170500	+
AT2TE05320	Chr2	1177850	1178780	+
AT2TE05395	Chr2	1193939	1194608	+
TEM1973	Chr2	1195827	1196939	+
AT2TE05455	Chr2	1210367	1211793	+
AT2TE05605	Chr2	1240984	1243325	+
AT2TE05630	Chr2	1244585	1245277	+
AT2TE05720	Chr2	1259836	1260401	+
AT2TE05725	Chr2	1260401	1260816	-
AT2TE05740	Chr2	1263000	1263526	+
AT2TE05750	Chr2	1263842	1264176	-
AT2TE05760	Chr2	1271981	1272231	-
AT2TE05785	Chr2	1277997	1278286	-
AT2TE05800	Chr2	1280868	1281521	-
AT2TE06005	Chr2	1318462	1318691	+
AT2TE06135	Chr2	1346627	1348486	+
AT2TE06170	Chr2	1353348	1353629	-
TEM2001	Chr2	1362258	1362669	+
AT2TE06330	Chr2	1380606	1381291	-
AT2TE06350	Chr2	1383514	1384426	-
AT2TE06395	Chr2	1393901	1395151	+
AT2TE06420	Chr2	1403862	1404635	+
AT2TE06490	Chr2	1413820	1414493	-
AT2TE06660	Chr2	1441856	1442963	+
AT2TE06680	Chr2	1444123	1444870	-
AT2TE06750	Chr2	1458341	1461262	-
AT2TE06770	Chr2	1461262	1461488	+
TEM2020	Chr2	1468389	1469967	+
AT2TE06865	Chr2	1482182	1482974	+
TEM2023	Chr2	1497655	1497973	+
AT2TE06950	Chr2	1503833	1505066	+
TEM2033	Chr2	1562591	1562961	+
AT2TE07190	Chr2	1564986	1566207	-
AT2TE07220	Chr2	1572435	1572659	-
AT2TE07225	Chr2	1572659	1573502	-
AT2TE07295	Chr2	1584872	1585622	+
AT2TE07300	Chr2	1587375	1587642	+
AT2TE07330	Chr2	1592950	1593214	+
AT2TE07495	Chr2	1620457	1620833	-
AT2TE07570	Chr2	1642168	1642711	+
AT2TE07590	Chr2	1642983	1643685	+
AT2TE07605	Chr2	1644040	1644400	+
AT2TE07705	Chr2	1663424	1663840	-
AT2TE07735	Chr2	1669760	1670332	-
AT2TE07775	Chr2	1678418	1679012	-
AT2TE07790	Chr2	1681391	1682511	-
TEM2063	Chr2	1683797	1684093	+
AT2TE07805	Chr2	1684820	1686097	+
AT2TE07845	Chr2	1691343	1692561	+
TEM2067	Chr2	1695716	1696139	+
AT2TE07880	Chr2	1701488	1702188	-
AT2TE07955	Chr2	1715793	1716096	+
AT2TE07965	Chr2	1716448	1716890	+
AT2TE07970	Chr2	1716643	1716853	-
AT2TE07975	Chr2	1716890	1717261	-
AT2TE08030	Chr2	1727324	1727551	-
AT2TE08055	Chr2	1731645	1732119	-
AT2TE08260	Chr2	1792236	1792479	-
AT2TE08340	Chr2	1821580	1821855	-
TEM2081	Chr2	1822569	1823347	+
AT2TE08605	Chr2	1869052	1869894	-
AT2TE08640	Chr2	1878331	1878623	+
AT2TE08750	Chr2	1899021	1899521	-
TEM2094	Chr2	1926737	1927713	+
AT2TE08865	Chr2	1929411	1930752	+
AT2TE08970	Chr2	1947595	1949041	-
AT2TE09085	Chr2	1968286	1968946	-
AT2TE09140	Chr2	1982791	1983132	+
AT2TE09190	Chr2	1990559	1991386	+
AT2TE09255	Chr2	2017685	2018551	+
AT2TE09345	Chr2	2034139	2035218	+
AT2TE09530	Chr2	2085001	2085343	+
AT2TE09540	Chr2	2085587	2086346	+
AT2TE09550	Chr2	2086505	2086979	+
AT2TE09950	Chr2	2162294	2162937	-
AT2TE10000	Chr2	2174242	2174522	-
AT2TE10025	Chr2	2178033	2178820	+
AT2TE10130	Chr2	2197121	2198179	-
AT2TE10215	Chr2	2213851	2214261	+
AT2TE10340	Chr2	2233691	2234035	-
AT2TE10360	Chr2	2240579	2241230	-
AT2TE10410	Chr2	2260685	2261026	-
AT2TE10425	Chr2	2261419	2262466	-
AT2TE10520	Chr2	2284530	2285293	-
TEM2147	Chr2	2291778	2292290	+
AT2TE10705	Chr2	2319958	2320939	+
AT2TE10750	Chr2	2330077	2330578	+
AT2TE10755	Chr2	2331932	2332392	-
TEM2155	Chr2	2336213	2336645	+
TEM2158	Chr2	2362544	2363221	+
AT2TE11075	Chr2	2428200	2428942	+
AT2TE12100	Chr2	2734487	2735506	-
AT2TE12180	Chr2	2756775	2757374	+
AT2TE12495	Chr2	2852647	2854329	-
TEM2190	Chr2	2893831	2894665	+
AT2TE12755	Chr2	2922387	2923829	+
AT2TE12760	Chr2	2923829	2924162	+
AT2TE12900	Chr2	2961895	2962812	-
AT2TE12930	Chr2	2964619	2966774	+
AT2TE12990	Chr2	2980028	2980789	-
AT2TE13010	Chr2	2983859	2985105	+
AT2TE13015	Chr2	2985105	2985522	-
AT2TE13775	Chr2	3191105	3191787	-
AT2TE13800	Chr2	3192625	3195997	+
AT2TE13805	Chr2	3195999	3197374	+
AT2TE13815	Chr2	3197407	3198631	-
AT2TE15645	Chr2	3583238	3583979	-
AT2TE15665	Chr2	3598055	3598805	+
AT2TE16940	Chr2	4005635	4007377	+
AT2TE17010	Chr2	4018205	4019393	-
AT2TE17015	Chr2	4018270	4018761	+
AT2TE17060	Chr2	4023317	4024951	-
AT2TE17275	Chr2	4084297	4086823	-
AT2TE17320	Chr2	4097103	4099067	-
AT2TE17510	Chr2	4143439	4143644	-
AT2TE17520	Chr2	4144490	4145069	+
AT2TE17525	Chr2	4145332	4145695	-
AT2TE17535	Chr2	4146664	4148108	+
AT2TE17540	Chr2	4148108	4148554	+
AT2TE17835	Chr2	4224173	4224643	-
AT2TE18075	Chr2	4304292	4304847	-
AT2TE18080	Chr2	4305858	4306353	+
AT2TE18140	Chr2	4314779	4315149	-
AT2TE18280	Chr2	4347960	4348352	+
AT2TE18305	Chr2	4351511	4353557	-
AT2TE18535	Chr2	4423356	4423837	+
AT2TE18735	Chr2	4471730	4472510	+
AT2TE18755	Chr2	4473966	4474210	+
AT2TE18760	Chr2	4474210	4476280	+
AT2TE19745	Chr2	4757879	4758824	-
AT2TE20150	Chr2	4870414	4870647	-
AT2TE20510	Chr2	5004365	5004804	-
AT2TE20755	Chr2	5048487	5049699	-
TEM2271	Chr2	5052261	5052514	+
AT2TE20805	Chr2	5056788	5056994	-
AT2TE21645	Chr2	5319340	5319817	-
AT2TE21895	Chr2	5409065	5409543	-
AT2TE22150	Chr2	5466054	5467917	-
AT2TE22570	Chr2	5589102	5590107	-
AT2TE22640	Chr2	5606127	5606390	-
AT2TE22690	Chr2	5610302	5612406	+
AT2TE22780	Chr2	5643356	5644475	+
AT2TE22790	Chr2	5645530	5645979	+
AT2TE22920	Chr2	5670439	5671143	+
TEM2310	Chr2	5691441	5691765	+
AT2TE23225	Chr2	5733139	5734015	-
AT2TE23295	Chr2	5747302	5747697	-
AT2TE23480	Chr2	5774613	5775710	+
TEM2319	Chr2	5835262	5835818	+
AT2TE23800	Chr2	5836182	5837620	+
AT2TE23805	Chr2	5837232	5837563	+
AT2TE24110	Chr2	5917653	5918051	+
TEM2331	Chr2	5924550	5924987	+
AT2TE24210	Chr2	5940206	5941108	-
AT2TE24230	Chr2	5942387	5943522	+
AT2TE24265	Chr2	5948872	5949792	+
AT2TE24270	Chr2	5949792	5950639	-
TEM2339	Chr2	6015811	6016079	+
TEM2340	Chr2	6016561	6017024	+
TEM2343	Chr2	6035947	6036802	+
AT2TE24760	Chr2	6084947	6087762	-
AT2TE25070	Chr2	6169047	6170917	+
AT2TE25255	Chr2	6205620	6206184	-
AT2TE25260	Chr2	6206184	6208507	+
AT2TE25300	Chr2	6215790	6216279	-
AT2TE25485	Chr2	6250700	6251210	+
AT2TE25565	Chr2	6274101	6275053	+
TEM2372	Chr2	6276748	6277077	+
AT2TE25630	Chr2	6288181	6288854	-
AT2TE25735	Chr2	6304457	6305141	-
AT2TE25935	Chr2	6366183	6366464	-
AT2TE26020	Chr2	6382655	6383125	+
AT2TE26035	Chr2	6383360	6384544	-
TEM2385	Chr2	6391225	6391996	+
TEM2387	Chr2	6398139	6398656	+
AT2TE26130	Chr2	6405690	6405977	+
AT2TE26140	Chr2	6409365	6410233	-
AT2TE26260	Chr2	6429861	6430711	+
AT2TE26510	Chr2	6485327	6485577	+
AT2TE26620	Chr2	6512567	6513788	-
AT2TE26670	Chr2	6521399	6523618	-
AT2TE26735	Chr2	6538554	6539157	-
TEM2412	Chr2	6544135	6544611	+
AT2TE26835	Chr2	6561057	6561294	+
AT2TE26840	Chr2	6561471	6562148	+
AT2TE27010	Chr2	6629249	6629980	-
TEM2426	Chr2	6665773	6666278	+
AT2TE27275	Chr2	6680828	6683312	+
AT2TE27280	Chr2	6682173	6683112	+
AT2TE27335	Chr2	6690899	6692436	-
AT2TE27435	Chr2	6714627	6714863	-
AT2TE27510	Chr2	6732964	6733217	+
AT2TE27595	Chr2	6757218	6757552	-
TEM2445	Chr2	6761087	6761291	+
AT2TE27690	Chr2	6790147	6791016	+
AT2TE27750	Chr2	6803130	6804492	+
AT2TE27795	Chr2	6809983	6810315	+
AT2TE27905	Chr2	6852467	6855257	-
AT2TE27935	Chr2	6860845	6861313	+
AT2TE27965	Chr2	6867192	6868059	-
AT2TE27970	Chr2	6867548	6867882	+
AT2TE27985	Chr2	6870788	6871404	-
AT2TE27990	Chr2	6873032	6873325	-
AT2TE28005	Chr2	6877360	6877583	-
TEM2466	Chr2	6896492	6897913	+
AT2TE28305	Chr2	6948413	6948721	-
AT2TE28435	Chr2	6982180	6982382	-
AT2TE28490	Chr2	6994633	6995765	-
AT2TE28580	Chr2	7022285	7024429	+
AT2TE28620	Chr2	7032512	7032744	-
AT2TE28710	Chr2	7056776	7056994	+
AT2G16340	Chr2	7073134	7073484	+
AT2TE28850	Chr2	7093494	7094589	+
AT2TE28860	Chr2	7095841	7096194	+
AT2TE28935	Chr2	7109739	7111059	-
AT2TE29090	Chr2	7148308	7150197	-
AT2TE29125	Chr2	7156938	7157167	+
AT2TE29180	Chr2	7166977	7169782	-
AT2TE29365	Chr2	7206512	7207947	-
TEM2510	Chr2	7238527	7238983	+
TEM2511	Chr2	7240385	7243147	+
AT2TE29500	Chr2	7246548	7247042	-
AT2TE29510	Chr2	7247565	7248142	+
TEM2514	Chr2	7257173	7257885	+
AT2TE29580	Chr2	7261160	7261625	+
AT2TE29680	Chr2	7278652	7279429	-
AT2TE29970	Chr2	7340313	7340993	+
AT2TE30025	Chr2	7350211	7351546	+
TEM2523	Chr2	7370711	7371423	+
AT2TE30160	Chr2	7374235	7374660	+
AT2TE30505	Chr2	7438935	7439807	-
AT2TE30510	Chr2	7441675	7442657	-
AT2TE30530	Chr2	7447006	7447764	+
AT2TE30590	Chr2	7457933	7458896	+
AT2TE30820	Chr2	7503712	7504389	-
AT2TE30925	Chr2	7521654	7522019	-
AT2TE30955	Chr2	7529062	7529548	-
AT2TE31000	Chr2	7539985	7540658	-
TEM2541	Chr2	7558351	7558642	+
AT2TE31140	Chr2	7566645	7567748	-
AT2TE31270	Chr2	7594764	7595564	-
AT2TE31380	Chr2	7622294	7622807	+
TEM2548	Chr2	7632713	7632988	+
AT2TE31520	Chr2	7650590	7650945	-
AT2TE31715	Chr2	7691566	7692285	-
TEM2560	Chr2	7719853	7720919	+
TEM2561	Chr2	7721457	7721980	+
AT2TE31990	Chr2	7749067	7749643	+
TEM2564	Chr2	7766545	7766865	+
AT2TE32305	Chr2	7813201	7813402	-
AT2TE32535	Chr2	7861124	7861659	+
TEM2573	Chr2	7875101	7875536	+
TEM2574	Chr2	7879601	7880601	+
AT2TE32640	Chr2	7883750	7884704	+
AT2TE32645	Chr2	7886419	7887562	+
TEM2582	Chr2	7919718	7920061	+
AT2TE32860	Chr2	7926488	7927530	+
AT2TE32970	Chr2	7950350	7951202	+
AT2TE33010	Chr2	7959522	7959806	-
TEM2587	Chr2	7962151	7962433	+
AT2TE33240	Chr2	8008695	8009232	-
AT2TE33250	Chr2	8009346	8009614	-
AT2TE33330	Chr2	8028045	8029825	-
AT2TE33340	Chr2	8030412	8030752	-
TEM2598	Chr2	8041463	8042038	+
AT2TE33405	Chr2	8045578	8046331	-
AT2TE33465	Chr2	8060960	8062109	-
AT2TE33945	Chr2	8166175	8167043	+
AT2TE34020	Chr2	8182764	8183299	+
AT2TE34110	Chr2	8200780	8201687	+
AT2TE34120	Chr2	8201961	8202175	+
AT2TE34125	Chr2	8202938	8203148	-
TEM2616	Chr2	8231751	8232024	+
AT2TE34275	Chr2	8236262	8237646	+
AT2TE35190	Chr2	8436555	8436774	+
AT2TE35195	Chr2	8436774	8437332	+
AT2TE35320	Chr2	8455188	8455884	+
AT2TE35500	Chr2	8489090	8489942	-
TEM2638	Chr2	8535119	8535515	+
TEM2639	Chr2	8536502	8536943	+
AT2TE35720	Chr2	8537701	8538271	-
AT2TE35805	Chr2	8554835	8556037	-
AT2TE35880	Chr2	8575091	8575771	+
AT2TE35900	Chr2	8578706	8579124	+
TEM2650	Chr2	8622121	8622668	+
AT2TE36200	Chr2	8641850	8642274	+
TEM2654	Chr2	8657955	8658299	+
AT2TE36320	Chr2	8666940	8667413	-
TEM2656	Chr2	8683192	8683551	+
AT2TE36505	Chr2	8707613	8708149	-
TEM2661	Chr2	8776874	8777258	+
AT2TE37070	Chr2	8824417	8824727	+
AT2TE37495	Chr2	8907407	8908078	+
AT2TE37505	Chr2	8908185	8909006	+
TEM2669	Chr2	8910942	8911592	+
AT2TE37680	Chr2	8939277	8939479	+
AT2TE37765	Chr2	8956953	8957576	+
AT2TE38000	Chr2	9005577	9005954	+
AT2TE38080	Chr2	9021982	9022268	+
AT2TE38150	Chr2	9038476	9039545	+
TEM2685	Chr2	9079566	9080007	+
AT2TE39070	Chr2	9225477	9226049	-
AT2TE39090	Chr2	9228630	9229177	-
TEM2697	Chr2	9289692	9290476	+
AT2TE39600	Chr2	9330500	9330797	+
TEM2702	Chr2	9338958	9339702	+
AT2TE39665	Chr2	9345031	9345355	+
AT2TE39680	Chr2	9349361	9350577	-
AT2TE39685	Chr2	9349537	9350398	-
AT2TE39820	Chr2	9378909	9379315	-
AT2TE39830	Chr2	9382343	9382607	-
TEM2709	Chr2	9402365	9403025	+
AT2TE40020	Chr2	9419033	9419969	-
AT2G22160	Chr2	9425143	9425460	-
TEM2712	Chr2	9432088	9432511	+
AT2TE40090	Chr2	9432662	9433854	+
TEM2714	Chr2	9439344	9439654	+
AT2TE40200	Chr2	9455234	9456574	+
AT2TE40270	Chr2	9470622	9470883	-
AT2TE40405	Chr2	9496051	9497136	+
TEM2725	Chr2	9518180	9518463	+
AT2TE40590	Chr2	9537547	9537878	+
TEM2728	Chr2	9550275	9550707	+
TEM2730	Chr2	9559123	9559768	+
TEM2731	Chr2	9566935	9567199	+
AT2TE40835	Chr2	9584491	9585378	+
TEM2733	Chr2	9591316	9592441	+
AT2TE40975	Chr2	9611997	9612944	-
AT2TE41130	Chr2	9644111	9644499	-
AT2TE41850	Chr2	9796484	9798016	+
AT2TE42055	Chr2	9836471	9837264	-
AT2TE42130	Chr2	9852040	9853022	+
AT2G23148	Chr2	9853609	9854156	+
AT2TE42170	Chr2	9859893	9860512	-
AT2TE42285	Chr2	9885233	9885584	+
AT2TE42320	Chr2	9891388	9891735	-
AT2TE42375	Chr2	9901440	9902318	+
AT2TE42380	Chr2	9901908	9902196	-
AT2TE42700	Chr2	9979042	9979301	-
AT2TE42715	Chr2	9980751	9981221	+
AT2TE42850	Chr2	10017682	10018059	-
AT2TE42940	Chr2	10036534	10040268	+
AT2TE43100	Chr2	10070065	10071017	-
TEM2780	Chr2	10133573	10133861	+
AT2TE43600	Chr2	10194705	10194957	-
AT2TE43610	Chr2	10198398	10198689	+
AT2TE43615	Chr2	10198689	10199558	-
AT2TE43805	Chr2	10238929	10239533	-
TEM2792	Chr2	10277915	10278486	+
AT2TE44395	Chr2	10359945	10360203	-
AT2TE44740	Chr2	10435230	10435488	-
AT2TE44870	Chr2	10461361	10462593	+
AT2TE44885	Chr2	10465319	10465689	+
AT2TE44915	Chr2	10468259	10469079	-
AT2TE44925	Chr2	10469136	10470100	-
AT2TE45180	Chr2	10527335	10527879	-
AT2TE45210	Chr2	10534898	10535902	-
AT2TE45250	Chr2	10541092	10541839	-
TEM2819	Chr2	10549951	10550337	+
TEM2821	Chr2	10554699	10555063	+
AT2TE45315	Chr2	10557818	10558547	-
AT2G24780	Chr2	10565622	10566182	-
TEM2825	Chr2	10588637	10589337	+
AT2G24880	Chr2	10590554	10590862	-
AT2TE45510	Chr2	10621489	10621919	-
AT2TE45795	Chr2	10682021	10682597	+
AT2TE45800	Chr2	10682597	10683546	+
AT2TE45805	Chr2	10683546	10683868	+
TEM2837	Chr2	10687006	10687829	+
TEM2839	Chr2	10728785	10729673	+
AT2TE46125	Chr2	10748727	10749222	-
AT2TE46575	Chr2	10842130	10842797	-
TEM2851	Chr2	10852083	10852296	+
AT2TE47135	Chr2	10951682	10952057	+
TEM2857	Chr2	10973029	10973880	+
AT2TE47640	Chr2	11052250	11053460	-
AT2TE47660	Chr2	11056381	11057088	-
TEM2866	Chr2	11058185	11058711	+
AT2TE47710	Chr2	11066245	11066852	-
TEM2868	Chr2	11075896	11076233	+
AT2TE47765	Chr2	11076577	11077468	+
AT2TE47890	Chr2	11100067	11101221	-
AT2TE48200	Chr2	11164219	11164547	+
AT2TE48225	Chr2	11168808	11169097	+
TEM2878	Chr2	11177101	11177393	+
AT2TE48470	Chr2	11216938	11217199	+
AT2TE48475	Chr2	11217199	11217399	+
TEM2885	Chr2	11298235	11298545	+
AT2TE48900	Chr2	11308484	11309168	-
TEM2889	Chr2	11315585	11315973	+
AT2TE49135	Chr2	11359967	11360206	+
AT2TE49145	Chr2	11362714	11363023	-
AT2TE49155	Chr2	11366533	11367320	+
AT2TE49190	Chr2	11373153	11374305	-
AT2TE49340	Chr2	11397761	11398385	+
TEM2899	Chr2	11408697	11409426	+
AT2TE49660	Chr2	11461331	11461532	+
AT2TE49855	Chr2	11503092	11503679	-
AT2TE50135	Chr2	11559056	11559448	+
AT2TE50335	Chr2	11597228	11598019	+
TEM2910	Chr2	11619256	11619818	+
AT2TE50470	Chr2	11624046	11624370	+
AT2TE50665	Chr2	11663671	11664656	-
AT2TE50670	Chr2	11663721	11663984	+
TEM2915	Chr2	11669031	11669573	+
TEM2917	Chr2	11693744	11694533	+
TEM2920	Chr2	11739846	11740179	+
AT2TE51240	Chr2	11786646	11786949	+
AT2TE51245	Chr2	11786975	11787295	-
AT2TE51470	Chr2	11834406	11834872	-
AT2TE51815	Chr2	11908867	11909851	-
AT2TE51870	Chr2	11920715	11921191	-
AT2TE52005	Chr2	11948942	11949404	+
AT2TE52080	Chr2	11964336	11964597	+
TEM2936	Chr2	12075973	12076403	+
AT2TE52710	Chr2	12101585	12102637	-
AT2TE52795	Chr2	12120873	12121656	+
AT2TE52900	Chr2	12143688	12144801	+
TEM2945	Chr2	12173951	12174330	+
TEM2947	Chr2	12181392	12181705	+
AT2TE53200	Chr2	12209272	12209729	-
TEM2950	Chr2	12242848	12243373	+
TEM2951	Chr2	12244017	12244253	+
TEM2952	Chr2	12256085	12256301	+
TEM2954	Chr2	12309665	12310275	+
TEM2956	Chr2	12372594	12373033	+
TEM2957	Chr2	12377293	12377913	+
TEM2958	Chr2	12392847	12393527	+
TEM2959	Chr2	12398138	12398531	+
TEM2960	Chr2	12409874	12410947	+
AT2TE54470	Chr2	12475702	12475916	-
TEM2964	Chr2	12477175	12477529	+
AT2TE55565	Chr2	12708738	12709220	+
AT2TE55625	Chr2	12725303	12725574	-
TEM2979	Chr2	12780440	12781035	+
AT2TE56135	Chr2	12833204	12834104	-
AT2TE56145	Chr2	12834135	12834835	+
AT2TE56250	Chr2	12857782	12858318	-
AT2TE56340	Chr2	12876124	12877655	-
TEM2988	Chr2	12886137	12887459	+
TEM2990	Chr2	12929843	12930603	+
AT2TE57230	Chr2	13064500	13068100	+
AT2TE57235	Chr2	13065405	13065742	-
AT2TE57420	Chr2	13101677	13102359	+
AT2TE57485	Chr2	13113265	13113911	-
TEM3000	Chr2	13159934	13161031	+
AT2TE58530	Chr2	13334471	13338272	-
AT2TE58535	Chr2	13338272	13338506	-
AT2TE58860	Chr2	13404295	13404567	-
AT2TE59000	Chr2	13432975	13433227	-
TEM3016	Chr2	13559965	13560578	+
TEM3017	Chr2	13579058	13579311	+
AT2TE59995	Chr2	13633554	13635046	+
AT2TE60115	Chr2	13661335	13662101	-
TEM3026	Chr2	13790444	13790673	+
TEM3031	Chr2	13879391	13879776	+
TEM3040	Chr2	14155402	14155686	+
AT2TE62740	Chr2	14190557	14191027	-
AT2TE63325	Chr2	14311174	14311719	+
AT2TE63580	Chr2	14363737	14364018	+
TEM3047	Chr2	14392847	14393153	+
AT2TE63815	Chr2	14415222	14415549	-
AT2TE63820	Chr2	14417022	14417298	+
AT2TE64580	Chr2	14571615	14572752	-
TEM3056	Chr2	14594989	14595369	+
AT2TE64895	Chr2	14632343	14633029	+
TEM3060	Chr2	14637744	14637948	+
TEM3062	Chr2	14675601	14676428	+
AT2TE65130	Chr2	14682471	14683688	+
AT2TE65795	Chr2	14812878	14813314	-
AT2TE65830	Chr2	14822084	14822802	+
TEM3069	Chr2	14887499	14887766	+
TEM3070	Chr2	14906697	14907671	+
TEM3071	Chr2	14920708	14921035	+
AT2TE67240	Chr2	15110101	15110326	-
AT2TE67345	Chr2	15133800	15134225	+
AT2TE67350	Chr2	15134225	15134771	+
AT2TE68040	Chr2	15273636	15274176	+
AT2TE68515	Chr2	15371089	15371985	-
AT2TE68900	Chr2	15448701	15449107	+
TEM3097	Chr2	15733282	15733817	+
TEM3098	Chr2	15791047	15791585	+
TEM3101	Chr2	15850928	15851314	+
AT2TE71055	Chr2	15884475	15885121	+
AT2TE73135	Chr2	16302178	16303298	-
TEM3119	Chr2	16329768	16329998	+
AT2TE73940	Chr2	16467346	16467949	+
TEM3128	Chr2	16539665	16539921	+
TEM3129	Chr2	16555992	16556374	+
AT2TE74405	Chr2	16560515	16560782	-
AT2TE74475	Chr2	16574720	16575666	+
TEM3132	Chr2	16587827	16588141	+
TEM3134	Chr2	16603465	16603832	+
TEM3138	Chr2	16798465	16798960	+
AT2TE75960	Chr2	16875597	16877147	+
TEM3141	Chr2	16889907	16890701	+
AT2TE76170	Chr2	16920990	16921448	-
TEM3143	Chr2	16952561	16952914	+
AT2TE77260	Chr2	17146828	17147730	-
AT2TE77265	Chr2	17147129	17147653	-
AT2TE77555	Chr2	17205773	17206413	+
AT2TE77895	Chr2	17274631	17275235	+
AT2TE77910	Chr2	17277612	17277925	-
TEM3157	Chr2	17289177	17289658	+
AT2TE78030	Chr2	17299406	17301578	+
TEM3159	Chr2	17307586	17307886	+
AT2TE78940	Chr2	17486367	17487161	-
TEM3166	Chr2	17530745	17531004	+
AT2TE79235	Chr2	17545763	17546812	+
TEM3172	Chr2	17788495	17788879	+
AT2TE81015	Chr2	17904193	17905467	-
AT2TE81445	Chr2	17992544	17993276	-
AT2TE81930	Chr2	18091978	18092230	-
TEM3176	Chr2	18093070	18093310	+
AT2TE82000	Chr2	18106653	18107024	+
AT2TE82790	Chr2	18267691	18268487	+
AT2TE83225	Chr2	18353682	18353916	-
TEM3184	Chr2	18387793	18388591	+
TEM3186	Chr2	18393399	18393831	+
TEM3187	Chr2	18395997	18396276	+
AT2TE83440	Chr2	18398701	18398912	+
AT2TE84090	Chr2	18528229	18528606	+
TEM3192	Chr2	18659626	18660339	+
TEM3194	Chr2	18702291	18703188	+
TEM3195	Chr2	18797452	18797946	+
AT2TE85710	Chr2	18853666	18854301	-
TEM3199	Chr2	18877943	18878245	+
AT2TE86400	Chr2	18993639	18994417	+
AT2G46460	Chr2	19071537	19072019	+
AT2TE87240	Chr2	19162601	19163647	+
AT2TE87415	Chr2	19195951	19196956	-
AT2TE87610	Chr2	19235686	19237227	-
AT2TE87640	Chr2	19242628	19243132	-
AT2TE87645	Chr2	19243132	19243487	-
AT2TE87760	Chr2	19268284	19269233	+
TEM3214	Chr2	19373989	19374380	+
AT2TE88570	Chr2	19433252	19433558	-
AT2TE89515	Chr2	19623096	19623647	+
TEM3220	Chr2	19683302	19683989	+
TEM3225	Chr3	50889	51117	+
TEM3226	Chr3	105484	105848	+
TEM3228	Chr3	132391	132813	+
TEM3232	Chr3	451640	452227	+
AT3TE02110	Chr3	495447	495957	-
AT3TE02290	Chr3	538809	539326	-
AT3TE02370	Chr3	558077	558300	+
TEM3241	Chr3	826860	827152	+
AT3TE04150	Chr3	985156	986226	+
TEM3247	Chr3	1030837	1031626	+
AT3TE04445	Chr3	1057570	1057922	-
TEM3249	Chr3	1064201	1064459	+
AT3TE04510	Chr3	1074147	1074909	-
TEM3251	Chr3	1165937	1166795	+
AT3TE05640	Chr3	1341710	1342220	-
AT3TE05850	Chr3	1385513	1386060	-
AT3TE06740	Chr3	1602085	1602670	+
TEM3268	Chr3	1923984	1924331	+
TEM3269	Chr3	1928316	1928695	+
TEM3270	Chr3	1951500	1951992	+
AT3TE09015	Chr3	2138404	2139312	+
AT3TE09475	Chr3	2250859	2251266	-
TEM3279	Chr3	2551691	2551908	+
AT3TE10950	Chr3	2600863	2601601	-
AT3TE11700	Chr3	2772621	2772911	+
AT3TE11705	Chr3	2772911	2773424	+
TEM3285	Chr3	2799043	2799370	+
TEM3287	Chr3	2849413	2849837	+
AT3TE12120	Chr3	2884002	2884461	+
AT3TE12270	Chr3	2919693	2921202	-
TEM3291	Chr3	2953228	2953469	+
TEM3294	Chr3	2998231	2998660	+
TEM3295	Chr3	3075236	3075728	+
TEM3301	Chr3	3204704	3205458	+
AT3TE13705	Chr3	3263427	3264065	+
AT3TE14700	Chr3	3497419	3497753	-
AT3TE14865	Chr3	3538064	3538351	-
AT3TE15085	Chr3	3587095	3587482	-
AT3TE15635	Chr3	3716079	3717528	+
AT3TE15810	Chr3	3750330	3750847	-
AT3TE16310	Chr3	3873754	3874629	+
AT3TE16790	Chr3	3986993	3988561	-
AT3TE17210	Chr3	4087387	4087713	+
TEM3326	Chr3	4165227	4165574	+
AT3TE17970	Chr3	4263026	4263233	-
AT3TE18020	Chr3	4274617	4275285	-
AT3TE18825	Chr3	4467614	4468511	+
AT3TE18945	Chr3	4494521	4495163	+
AT3TE18950	Chr3	4494813	4495020	-
TEM3338	Chr3	4497489	4497933	+
AT3TE19195	Chr3	4551511	4552277	+
TEM3342	Chr3	4635209	4635613	+
AT3TE19950	Chr3	4728233	4728660	-
AT3TE20430	Chr3	4839206	4839710	+
TEM3352	Chr3	5137269	5138054	+
TEM3357	Chr3	5328571	5328904	+
AT3TE22585	Chr3	5377978	5378215	+
TEM3365	Chr3	5469837	5470231	+
AT3TE23100	Chr3	5496457	5496697	+
TEM3368	Chr3	5528770	5529234	+
AT3TE23485	Chr3	5590740	5591635	-
AT3TE23635	Chr3	5623755	5624173	+
AT3TE24350	Chr3	5792275	5792481	+
AT3TE24455	Chr3	5815401	5816073	+
TEM3382	Chr3	5835077	5835789	+
AT3TE24540	Chr3	5836323	5836565	+
AT3TE24555	Chr3	5839379	5839970	+
TEM3384	Chr3	5862060	5862367	+
AT3TE25135	Chr3	5981916	5983138	+
AT3TE26660	Chr3	6335877	6336593	+
AT3TE26790	Chr3	6366115	6366740	-
TEM3408	Chr3	6668279	6668878	+
TEM3409	Chr3	6705109	6705615	+
AT3TE28210	Chr3	6716974	6718178	-
AT3TE28255	Chr3	6728212	6729552	-
AT3TE28430	Chr3	6771214	6771726	+
AT3TE28440	Chr3	6771833	6772463	+
TEM3415	Chr3	6793508	6794365	+
AT3TE29300	Chr3	6978013	6978290	+
AT3TE29800	Chr3	7094072	7094327	-
AT3TE30000	Chr3	7142255	7143291	+
TEM3428	Chr3	7210006	7210297	+
TEM3429	Chr3	7214467	7214784	+
TEM3430	Chr3	7231776	7232147	+
AT3TE30560	Chr3	7274547	7274766	-
TEM3436	Chr3	7288049	7288659	+
AT3TE30635	Chr3	7291080	7291966	-
TEM3439	Chr3	7317451	7317736	+
AT3TE30755	Chr3	7318379	7319304	+
AT3TE30860	Chr3	7341946	7342567	+
AT3TE30920	Chr3	7355354	7355869	-
AT3TE31510	Chr3	7502252	7503052	+
AT3TE31770	Chr3	7560244	7560463	+
TEM3450	Chr3	7600039	7600939	+
TEM3451	Chr3	7634493	7634896	+
TEM3454	Chr3	7643920	7644145	+
AT3TE32175	Chr3	7658269	7659418	-
AT3TE32695	Chr3	7785695	7786607	-
TEM3470	Chr3	7834532	7834938	+
AT3TE32960	Chr3	7856093	7856978	-
AT3TE32965	Chr3	7856978	7857292	+
TEM3475	Chr3	7880701	7881037	+
AT3TE33265	Chr3	7936984	7937572	-
AT3TE33275	Chr3	7938343	7938933	+
TEM3484	Chr3	7945237	7945597	+
AT3TE33450	Chr3	7978693	7979925	+
AT3TE33485	Chr3	7982100	7982301	+
TEM3493	Chr3	8081760	8082185	+
TEM3497	Chr3	8121988	8122684	+
AT3TE34145	Chr3	8138496	8138878	+
AT3TE34190	Chr3	8149875	8150491	-
AT3TE34345	Chr3	8187977	8189358	-
AT3TE34420	Chr3	8209483	8209755	-
TEM3508	Chr3	8244985	8245486	+
AT3TE34925	Chr3	8328598	8329494	+
AT3TE34975	Chr3	8343659	8345642	-
TEM3517	Chr3	8356834	8357102	+
AT3TE35130	Chr3	8379783	8380063	+
TEM3521	Chr3	8397163	8397725	+
AT3TE35320	Chr3	8425793	8426325	-
AT3TE35610	Chr3	8491944	8493412	-
TEM3533	Chr3	8547208	8547983	+
TEM3534	Chr3	8564862	8565106	+
AT3TE36040	Chr3	8596060	8597767	-
AT3TE36105	Chr3	8613439	8614697	-
AT3TE36235	Chr3	8644606	8645385	+
AT3TE36400	Chr3	8684419	8685340	-
AT3TE36695	Chr3	8752365	8752789	-
AT3TE36720	Chr3	8757542	8757820	+
TEM3550	Chr3	8758661	8759067	+
AT3TE36770	Chr3	8771975	8772852	+
AT3TE37020	Chr3	8836289	8837288	-
AT3G24465	Chr3	8894870	8895140	-
TEM3564	Chr3	8944789	8945124	+
TEM3565	Chr3	8949337	8949613	+
AT3TE37840	Chr3	9055107	9055334	+
TEM3575	Chr3	9123629	9123873	+
AT3TE38180	Chr3	9134281	9134753	-
TEM3580	Chr3	9148907	9149138	+
TEM3581	Chr3	9153773	9154201	+
AT3TE38340	Chr3	9179324	9179751	-
AT3TE39125	Chr3	9363016	9363553	+
AT3TE39545	Chr3	9471427	9472162	-
AT3TE39555	Chr3	9474662	9474933	+
AT3TE39910	Chr3	9563286	9563852	+
TEM3619	Chr3	9595461	9595775	+
TEM3624	Chr3	9649519	9649907	+
TEM3626	Chr3	9681887	9682757	+
AT3TE40435	Chr3	9698971	9699190	-
AT3TE40445	Chr3	9702879	9703562	-
TEM3632	Chr3	9713563	9713984	+
AT3TE40535	Chr3	9736152	9736695	-
TEM3634	Chr3	9736976	9737278	+
AT3TE40555	Chr3	9742163	9742514	-
AT3TE40655	Chr3	9766254	9767628	-
AT3TE40665	Chr3	9767689	9768278	+
AT3TE40670	Chr3	9769047	9769415	-
AT3TE40845	Chr3	9815319	9815640	-
AT3TE40900	Chr3	9828597	9829385	-
AT3TE40965	Chr3	9839312	9839597	+
AT3TE41165	Chr3	9889578	9891078	+
AT3G26870	Chr3	9903288	9903680	-
AT3TE41475	Chr3	9966031	9967545	+
AT3TE41480	Chr3	9967545	9967771	+
TEM3658	Chr3	9981849	9982344	+
AT3TE41600	Chr3	9996175	9996572	-
AT3TE41655	Chr3	10008500	10009413	+
TEM3666	Chr3	10030311	10030593	+
AT3TE41800	Chr3	10039038	10039282	-
TEM3670	Chr3	10044580	10045011	+
TEM3672	Chr3	10062633	10062881	+
AT3TE41970	Chr3	10081557	10082995	-
AT3TE42065	Chr3	10104896	10105360	+
AT3G27331	Chr3	10115541	10116278	+
AT3TE42180	Chr3	10136918	10137716	-
AT3TE42205	Chr3	10146392	10146695	+
AT3TE42280	Chr3	10171480	10171719	-
AT3TE42350	Chr3	10190656	10191144	+
AT3TE42460	Chr3	10213616	10213934	-
AT3TE42525	Chr3	10231687	10232150	-
TEM3698	Chr3	10253739	10253944	+
AT3TE42600	Chr3	10254593	10254962	-
AT3G27680	Chr3	10254886	10255290	-
AT3TE42740	Chr3	10284231	10284554	+
AT3TE42850	Chr3	10313642	10314813	-
AT3TE42870	Chr3	10319895	10321636	+
AT3TE43235	Chr3	10406170	10407431	+
AT3TE43290	Chr3	10422772	10423974	-
AT3TE43320	Chr3	10432107	10433624	-
AT3TE43325	Chr3	10432539	10433078	-
TEM3720	Chr3	10434185	10434759	+
AT3TE43375	Chr3	10442161	10442732	+
AT3TE43415	Chr3	10449618	10450104	-
AT3TE43690	Chr3	10517673	10517944	+
AT3TE43700	Chr3	10522043	10522502	+
TEM3737	Chr3	10552430	10552973	+
AT3TE43880	Chr3	10555961	10558868	-
AT3TE43985	Chr3	10572563	10574171	+
TEM3746	Chr3	10628415	10628753	+
TEM3751	Chr3	10653925	10654308	+
AT3TE44325	Chr3	10666363	10666944	+
AT3TE44380	Chr3	10681048	10682033	-
AT3TE44765	Chr3	10764422	10766124	+
AT3TE44810	Chr3	10775849	10777173	+
TEM3772	Chr3	10781392	10782071	+
TEM3773	Chr3	10791090	10791546	+
AT3TE44995	Chr3	10825144	10825769	+
AT3TE45080	Chr3	10841579	10843618	+
AT3TE45145	Chr3	10860237	10860747	-
TEM3792	Chr3	10899109	10899372	+
AT3TE45325	Chr3	10900842	10902022	+
AT3TE45345	Chr3	10905318	10906339	+
TEM3804	Chr3	10950081	10950903	+
TEM3809	Chr3	10960853	10961209	+
AT3TE45685	Chr3	10991051	10991733	-
TEM3817	Chr3	11010103	11010645	+
AT3TE45860	Chr3	11031868	11032284	-
AT3TE45945	Chr3	11049545	11049906	+
AT3TE45960	Chr3	11053115	11053400	+
AT3TE46030	Chr3	11077503	11078239	+
TEM3831	Chr3	11082461	11083245	+
AT3TE46080	Chr3	11086281	11086582	+
AT3TE46115	Chr3	11088991	11090176	+
AT3TE46155	Chr3	11093559	11094554	+
AT3TE46170	Chr3	11097259	11099626	+
TEM3839	Chr3	11104155	11105415	+
AT3TE46225	Chr3	11110747	11112346	+
AT3TE46275	Chr3	11132616	11133977	+
AT3TE46285	Chr3	11134019	11135124	-
AT3TE46295	Chr3	11135187	11135596	-
AT3TE46330	Chr3	11140920	11141140	+
AT3TE46335	Chr3	11141518	11142228	+
AT3TE46395	Chr3	11157910	11158915	-
AT3TE46410	Chr3	11162715	11162948	-
AT3TE46655	Chr3	11200483	11202772	-
AT3TE46760	Chr3	11222006	11223349	-
AT3TE46950	Chr3	11263354	11263556	-
TEM3864	Chr3	11270309	11270913	+
TEM3866	Chr3	11276135	11276530	+
AT3TE47005	Chr3	11279282	11279565	+
AT3TE47020	Chr3	11283963	11284274	+
AT3TE47035	Chr3	11286432	11288246	-
AT3TE47250	Chr3	11345521	11345762	-
AT3TE47325	Chr3	11365058	11365831	+
AT3TE48055	Chr3	11535272	11535506	-
AT3TE48060	Chr3	11535506	11540086	+
AT3TE48180	Chr3	11588352	11589530	-
AT3TE48430	Chr3	11646059	11647280	-
AT3TE48580	Chr3	11694220	11695820	-
AT3TE48605	Chr3	11703501	11703830	+
AT3TE48805	Chr3	11717964	11719067	+
AT3TE48895	Chr3	11741561	11743123	+
AT3TE48910	Chr3	11745514	11746336	-
AT3TE48930	Chr3	11751404	11751873	+
AT3TE48990	Chr3	11762559	11765837	-
AT3TE49295	Chr3	11847468	11848453	+
AT3TE49395	Chr3	11863213	11864420	-
AT3TE49480	Chr3	11886138	11886851	+
AT3TE49500	Chr3	11889203	11890560	+
AT3TE49515	Chr3	11892104	11892342	+
TEM3942	Chr3	11904631	11904999	+
TEM3943	Chr3	11907147	11907567	+
AT3TE49605	Chr3	11917919	11918527	-
AT3TE49770	Chr3	11954128	11954424	-
AT3TE49790	Chr3	11959241	11960293	-
AT3TE49835	Chr3	11966291	11968819	+
AT3G30383	Chr3	11984594	11985002	+
AT3TE50230	Chr3	12061954	12062908	+
TEM3958	Chr3	12126555	12126979	+
AT3TE50405	Chr3	12128448	12128653	+
AT3TE50470	Chr3	12138562	12138950	+
AT3TE50490	Chr3	12143807	12144047	+
TEM3971	Chr3	12300918	12301487	+
AT3TE51170	Chr3	12353843	12354728	-
AT3TE51195	Chr3	12358189	12362224	-
AT3TE51200	Chr3	12358872	12359454	-
AT3TE51430	Chr3	12454056	12455007	+
AT3TE51775	Chr3	12573383	12573609	-
AT3TE52075	Chr3	12658545	12658865	+
AT3TE53530	Chr3	13063457	13064373	+
AT3TE54480	Chr3	13326933	13329125	+
AT3TE54885	Chr3	13482237	13482484	-
AT3TE58565	Chr3	14240634	14241210	+
AT3TE58650	Chr3	14272594	14272907	+
TEM4028	Chr3	14318475	14319406	+
AT3TE60260	Chr3	14736575	14737843	-
AT3TE60495	Chr3	14811750	14812627	-
AT3TE60575	Chr3	14836236	14837372	-
AT3TE60810	Chr3	14904412	14905272	-
AT3TE60890	Chr3	14928564	14929349	-
AT3TE61680	Chr3	15172904	15173473	+
AT3TE61735	Chr3	15189169	15189990	+
TEM4072	Chr3	15196169	15196720	+
AT3TE61845	Chr3	15215216	15215775	-
AT3TE62305	Chr3	15338715	15339110	+
AT3G43420	Chr3	15345315	15345679	+
AT3TE62375	Chr3	15356063	15356847	+
AT3TE62380	Chr3	15358637	15358955	-
AT3TE62400	Chr3	15366939	15367297	+
AT3TE62410	Chr3	15371118	15371565	+
AT3TE62625	Chr3	15436930	15437158	-
AT3TE62630	Chr3	15437182	15437401	-
AT3TE62675	Chr3	15453327	15453835	-
AT3TE63005	Chr3	15565959	15566955	-
AT3TE63095	Chr3	15609263	15609687	+
AT3TE63260	Chr3	15642941	15644096	+
AT3TE63265	Chr3	15645707	15646151	+
AT3TE63305	Chr3	15654618	15655406	+
AT3TE63320	Chr3	15659132	15659422	+
AT3TE63360	Chr3	15666787	15667488	+
AT3TE63560	Chr3	15730821	15731397	-
AT3TE63580	Chr3	15733971	15734200	+
TEM4121	Chr3	15741255	15741475	+
AT3TE63730	Chr3	15763465	15764184	+
AT3TE63810	Chr3	15780631	15780831	+
TEM4128	Chr3	15781682	15782354	+
TEM4129	Chr3	15783171	15783716	+
AT3TE63995	Chr3	15826537	15827957	+
AT3TE64020	Chr3	15833061	15834227	-
AT3TE64100	Chr3	15844428	15845166	+
AT3TE64200	Chr3	15868074	15868705	-
AT3TE64235	Chr3	15879985	15880517	-
AT3TE64285	Chr3	15886707	15887131	-
AT3TE64335	Chr3	15895505	15896087	+
TEM4152	Chr3	15903960	15904808	+
AT3TE64390	Chr3	15912038	15912298	-
AT3TE64450	Chr3	15926360	15927499	+
AT3TE64485	Chr3	15936902	15940069	+
AT3TE64495	Chr3	15941183	15943552	-
AT3TE64675	Chr3	15976779	15979108	-
AT3TE64705	Chr3	15981927	15983267	+
AT3TE64790	Chr3	16005693	16006166	+
TEM4169	Chr3	16011232	16011439	+
AT3TE64955	Chr3	16051818	16052282	-
AT3TE64960	Chr3	16052282	16052521	+
AT3TE65005	Chr3	16061209	16064128	-
AT3TE65010	Chr3	16061468	16062877	-
AT3G44440	Chr3	16070840	16071256	+
AT3TE65065	Chr3	16078963	16079586	+
AT3TE65090	Chr3	16085135	16085723	+
AT3TE65200	Chr3	16113240	16113688	-
AT3TE65205	Chr3	16113688	16114096	-
TEM4182	Chr3	16114209	16114801	+
AT3TE65250	Chr3	16125367	16125775	+
AT3TE65295	Chr3	16131485	16132678	+
AT3TE65460	Chr3	16156562	16158214	-
AT3TE65510	Chr3	16169324	16170120	+
TEM4193	Chr3	16193209	16193772	+
AT3TE65615	Chr3	16201299	16201639	+
AT3TE65630	Chr3	16204731	16204986	+
AT3TE65635	Chr3	16204986	16206208	-
AT3TE65670	Chr3	16212614	16214206	+
AT3TE65715	Chr3	16222650	16225512	+
AT3TE65725	Chr3	16225611	16226238	-
AT3TE65770	Chr3	16235589	16235925	+
AT3TE65870	Chr3	16258166	16258664	-
AT3TE65915	Chr3	16266584	16267220	-
AT3TE65930	Chr3	16268465	16270066	+
AT3TE65950	Chr3	16275195	16276818	-
AT3TE65955	Chr3	16276818	16277153	-
AT3TE65960	Chr3	16277153	16277361	+
AT3TE65970	Chr3	16278797	16280473	+
AT3TE66060	Chr3	16301842	16303089	+
AT3TE66340	Chr3	16378682	16379155	-
AT3TE66400	Chr3	16395677	16395880	+
AT3TE66450	Chr3	16405292	16406121	+
AT3TE66525	Chr3	16416514	16419640	+
AT3TE66530	Chr3	16419640	16420483	+
AT3TE66610	Chr3	16435982	16436331	-
AT3TE66720	Chr3	16453479	16453883	+
TEM4236	Chr3	16459008	16459535	+
AT3TE66765	Chr3	16470339	16471533	+
AT3TE66955	Chr3	16519641	16520784	+
AT3TE66965	Chr3	16521759	16522243	+
AT3TE67015	Chr3	16534378	16535303	-
AT3TE67120	Chr3	16553081	16554521	+
AT3TE67135	Chr3	16556114	16556705	-
AT3TE67160	Chr3	16560363	16563589	+
AT3TE67180	Chr3	16568176	16568744	-
AT3TE67265	Chr3	16584877	16585241	-
AT3TE67580	Chr3	16677399	16678516	+
TEM4266	Chr3	16681933	16683381	+
AT3TE67615	Chr3	16686141	16686898	+
AT3TE67780	Chr3	16723024	16723678	-
AT3TE67795	Chr3	16726472	16728618	+
AT3TE67835	Chr3	16737595	16738663	-
TEM4280	Chr3	16754671	16755001	+
AT3TE67950	Chr3	16770364	16770569	+
TEM4287	Chr3	16797947	16798659	+
AT3TE68145	Chr3	16826342	16828630	+
TEM4292	Chr3	16839623	16840582	+
AT3TE68255	Chr3	16851435	16854288	-
AT3TE68270	Chr3	16854826	16855534	-
AT3TE68385	Chr3	16879337	16880668	+
AT3TE68485	Chr3	16902366	16903891	+
AT3TE68530	Chr3	16910866	16911444	-
TEM4302	Chr3	16939315	16939851	+
TEM4303	Chr3	16943007	16944040	+
AT3TE68690	Chr3	16947271	16947701	-
AT3TE68850	Chr3	16988913	16989594	+
AT3TE68875	Chr3	16992612	16995775	-
AT3TE68985	Chr3	17019568	17019782	-
AT3TE69010	Chr3	17027076	17027279	-
AT3TE69090	Chr3	17046124	17046403	-
AT3TE69105	Chr3	17047950	17048625	+
TEM4327	Chr3	17086939	17087428	+
TEM4331	Chr3	17140059	17140383	+
AT3TE69470	Chr3	17141845	17143390	-
AT3TE69495	Chr3	17150117	17150795	-
AT3TE69535	Chr3	17162597	17162857	+
TEM4341	Chr3	17178403	17178723	+
TEM4346	Chr3	17249414	17249834	+
TEM4347	Chr3	17260768	17261418	+
TEM4348	Chr3	17270120	17270795	+
AT3TE70035	Chr3	17275311	17277819	-
AT3TE70170	Chr3	17310912	17311829	+
TEM4353	Chr3	17321063	17321756	+
AT3TE70260	Chr3	17332267	17332637	+
AT3TE70355	Chr3	17352956	17353611	-
TEM4358	Chr3	17377217	17377581	+
AT3TE70455	Chr3	17380249	17380905	+
AT3TE70555	Chr3	17396404	17397020	+
AT3TE71075	Chr3	17545739	17546431	-
AT3TE71080	Chr3	17546431	17546877	-
TEM4374	Chr3	17548577	17548859	+
AT3TE71245	Chr3	17587218	17587514	+
AT3TE71380	Chr3	17622862	17623916	+
TEM4384	Chr3	17656315	17656707	+
AT3TE71530	Chr3	17658722	17659036	+
TEM4390	Chr3	17728595	17729029	+
AT3TE71820	Chr3	17729458	17731271	+
AT3TE72355	Chr3	17860888	17861979	-
TEM4398	Chr3	17881483	17881701	+
AT3TE72510	Chr3	17899378	17899619	-
AT3TE72635	Chr3	17928517	17928780	-
AT3TE73025	Chr3	18018776	18019898	+
AT3TE73205	Chr3	18059088	18059888	-
AT3TE73225	Chr3	18062270	18062633	+
AT3TE73230	Chr3	18062633	18063039	-
TEM4416	Chr3	18088533	18088835	+
AT3TE73690	Chr3	18171337	18172767	-
AT3TE73745	Chr3	18179966	18180736	-
AT3TE74110	Chr3	18268417	18268679	-
AT3TE74210	Chr3	18295435	18295637	-
AT3TE74215	Chr3	18295637	18296205	+
AT3TE74275	Chr3	18308792	18310956	+
AT3TE74280	Chr3	18311156	18311384	-
AT3TE74700	Chr3	18410892	18413336	+
AT3TE75045	Chr3	18494752	18496044	-
TEM4443	Chr3	18531896	18532123	+
TEM4447	Chr3	18563999	18564374	+
TEM4448	Chr3	18569369	18569989	+
AT3TE75405	Chr3	18584763	18585163	+
AT3TE75500	Chr3	18611703	18612106	-
TEM4456	Chr3	18705223	18705478	+
AT3G50540	Chr3	18757749	18758244	+
AT3TE76480	Chr3	18860901	18861154	-
AT3TE76530	Chr3	18873610	18873890	-
AT3TE76625	Chr3	18895718	18896368	-
AT3TE76745	Chr3	18925101	18925338	+
AT3TE76750	Chr3	18925338	18925597	+
AT3TE76765	Chr3	18926159	18926392	-
TEM4480	Chr3	18976699	18977172	+
AT3TE77420	Chr3	19088118	19088921	-
AT3TE77800	Chr3	19178414	19178984	-
TEM4491	Chr3	19298735	19299184	+
AT3TE79005	Chr3	19464441	19465095	+
AT3TE79130	Chr3	19496127	19496892	-
AT3TE79240	Chr3	19520642	19521598	+
AT3TE79300	Chr3	19533924	19534234	-
AT3TE79320	Chr3	19536456	19537958	-
TEM4508	Chr3	19568266	19568561	+
AT3TE79695	Chr3	19621941	19624005	+
AT3TE79795	Chr3	19647831	19648851	-
AT3TE80165	Chr3	19739695	19740397	+
AT3TE80315	Chr3	19778051	19779709	-
TEM4523	Chr3	20090240	20090983	+
TEM4524	Chr3	20106587	20106959	+
AT3TE81870	Chr3	20144070	20144282	+
AT3TE82060	Chr3	20188455	20189429	+
AT3TE82140	Chr3	20209290	20209743	-
AT3TE82430	Chr3	20277020	20277231	+
TEM4532	Chr3	20285977	20286364	+
TEM4535	Chr3	20330201	20330403	+
AT3G54925	Chr3	20349435	20349980	-
AT3TE82720	Chr3	20353389	20353918	+
AT3G55252	Chr3	20480728	20481322	-
TEM4538	Chr3	20480795	20481288	+
AT3G55254	Chr3	20482190	20482813	-
AT3TE83890	Chr3	20629316	20629826	+
TEM4546	Chr3	20652203	20652809	+
AT3TE84000	Chr3	20654616	20658024	+
TEM4548	Chr3	20660070	20660725	+
AT3TE84115	Chr3	20686590	20686825	+
TEM4555	Chr3	20746229	20746655	+
TEM4556	Chr3	20750859	20752027	+
TEM4557	Chr3	20763564	20764673	+
AT3TE84910	Chr3	20875076	20875604	+
TEM4563	Chr3	20929435	20930577	+
AT3TE85480	Chr3	21008238	21008659	+
AT3TE85550	Chr3	21026283	21026546	-
TEM4569	Chr3	21109111	21109570	+
AT3TE85990	Chr3	21130157	21130711	+
TEM4571	Chr3	21267039	21267887	+
AT3TE86960	Chr3	21363603	21364016	+
TEM4576	Chr3	21413154	21413541	+
AT3TE87420	Chr3	21472158	21472859	+
TEM4583	Chr3	21547477	21547978	+
AT3TE87990	Chr3	21608568	21609013	-
AT3TE88030	Chr3	21616806	21617554	-
AT3TE88185	Chr3	21654242	21656304	-
AT3TE88345	Chr3	21694104	21694936	+
AT3TE89130	Chr3	21882626	21883496	-
AT3TE89820	Chr3	22057849	22058180	-
AT3TE89880	Chr3	22076419	22076835	-
TEM4601	Chr3	22203805	22204239	+
AT3TE90460	Chr3	22215278	22215958	-
AT3TE90650	Chr3	22260252	22260675	+
TEM4609	Chr3	22370106	22370755	+
TEM4611	Chr3	22377635	22378301	+
AT3TE91590	Chr3	22476856	22477419	+
AT3TE91790	Chr3	22533167	22533743	-
TEM4624	Chr3	22537124	22537529	+
AT3TE91815	Chr3	22538868	22540241	+
AT3TE91920	Chr3	22562667	22562935	-
AT3TE91990	Chr3	22577333	22578601	-
AT3TE92340	Chr3	22660299	22660734	-
TEM4642	Chr3	22931915	22932219	+
AT3TE93590	Chr3	22954474	22954975	-
AT3TE94135	Chr3	23085517	23086101	+
AT3TE94780	Chr3	23255524	23256357	-
AT4TE00085	Chr4	15964	17542	+
AT4TE00090	Chr4	17542	17859	+
AT4TE00310	Chr4	66449	67743	-
AT4TE00320	Chr4	68734	69015	+
AT4TE00545	Chr4	111050	111658	-
AT4TE00595	Chr4	118859	119490	-
AT4TE00615	Chr4	120129	121565	-
AT4TE00745	Chr4	144668	145234	-
AT4TE00800	Chr4	154245	154679	+
AT4TE00950	Chr4	184374	185512	+
TEM4679	Chr4	191866	192426	+
TEM4685	Chr4	310727	311203	+
AT4TE01620	Chr4	311899	312570	-
AT4TE01700	Chr4	324011	324905	+
AT4TE01825	Chr4	347601	349008	+
AT4TE01935	Chr4	371492	371745	-
AT4TE01955	Chr4	376002	376409	-
AT4TE01960	Chr4	376597	377216	-
AT4TE02155	Chr4	415519	415848	+
AT4TE02165	Chr4	417304	418414	-
AT4TE02410	Chr4	464067	464811	+
AT4TE02470	Chr4	474382	475199	+
TEM4701	Chr4	476061	476430	+
AT4TE02530	Chr4	486191	486642	-
AT4TE02735	Chr4	521766	522390	+
TEM4705	Chr4	524395	524869	+
AT4TE02900	Chr4	554020	554347	+
AT4TE02945	Chr4	563369	564437	-
AT4TE02995	Chr4	571979	573028	+
AT4TE03045	Chr4	583498	583741	-
AT4TE03080	Chr4	589231	590969	-
AT4TE03095	Chr4	591182	591672	-
AT4TE03100	Chr4	591677	591905	+
AT4TE03220	Chr4	617170	617774	-
AT4TE03225	Chr4	617774	618487	-
TEM4724	Chr4	653333	653758	+
AT4TE03590	Chr4	697318	697570	-
AT4TE03595	Chr4	697583	698822	-
AT4TE03735	Chr4	724862	726596	-
AT4TE03740	Chr4	728325	728533	+
TEM4737	Chr4	734867	735248	+
AT4TE03815	Chr4	743215	743955	-
AT4TE03920	Chr4	763514	764448	-
AT4TE04080	Chr4	791703	793045	-
AT4TE04220	Chr4	823506	824051	-
TEM4747	Chr4	848592	849127	+
AT4TE04725	Chr4	929456	929726	-
TEM4755	Chr4	934293	934641	+
AT4TE04850	Chr4	954223	954479	+
TEM4757	Chr4	958943	959734	+
AT4TE04895	Chr4	963579	964423	-
TEM4761	Chr4	993338	994343	+
TEM4769	Chr4	1041961	1042272	+
AT4TE05400	Chr4	1063406	1063610	-
AT4TE06080	Chr4	1190060	1190301	+
AT4TE06130	Chr4	1198250	1199600	-
TEM4780	Chr4	1223925	1224216	+
TEM4783	Chr4	1236177	1237003	+
AT4TE06435	Chr4	1258107	1258343	-
TEM4792	Chr4	1337674	1338258	+
AT4TE06880	Chr4	1349024	1351883	+
TEM4794	Chr4	1356017	1356588	+
AT4TE06910	Chr4	1356978	1358427	+
AT4TE06950	Chr4	1365782	1366187	+
TEM4800	Chr4	1407569	1407790	+
AT4TE07535	Chr4	1480680	1481576	+
AT4TE07570	Chr4	1487366	1488605	+
TEM4808	Chr4	1506865	1507263	+
TEM4809	Chr4	1507864	1508099	+
TEM4810	Chr4	1508977	1509522	+
AT4TE07715	Chr4	1515119	1515531	-
AT4TE07840	Chr4	1540766	1541536	+
AT4TE07985	Chr4	1568582	1568809	+
AT4TE07995	Chr4	1568874	1569443	+
TEM4819	Chr4	1590904	1591336	+
TEM4824	Chr4	1757033	1757657	+
AT4TE09140	Chr4	1861625	1862192	-
AT4TE09275	Chr4	1886229	1887357	-
AT4TE09400	Chr4	1956611	1957712	+
AT4TE09410	Chr4	1958752	1960245	-
AT4TE09655	Chr4	2029305	2029914	+
AT4TE09670	Chr4	2031890	2032444	-
TEM4846	Chr4	2036351	2037087	+
AT4TE09750	Chr4	2051100	2051377	+
AT4TE10035	Chr4	2117280	2117776	+
TEM4851	Chr4	2118740	2119198	+
AT4TE10080	Chr4	2122010	2122472	-
TEM4863	Chr4	2232265	2232663	+
AT4TE10480	Chr4	2244847	2245084	+
TEM4876	Chr4	2332885	2333367	+
TEM4877	Chr4	2334045	2334525	+
TEM4883	Chr4	2384267	2384677	+
AT4TE11130	Chr4	2388222	2388831	+
TEM4890	Chr4	2419198	2419859	+
AT4TE11300	Chr4	2423220	2423779	+
AT4TE11340	Chr4	2431855	2432158	+
AT4TE11345	Chr4	2433930	2434300	-
AT4TE11395	Chr4	2447337	2447802	-
AT4TE11410	Chr4	2450346	2450564	+
AT4TE11510	Chr4	2467189	2467737	-
AT4TE11715	Chr4	2508546	2508938	+
AT4TE11785	Chr4	2521569	2521987	-
TEM4909	Chr4	2531950	2532365	+
AT4TE12035	Chr4	2570594	2570834	+
AT4TE12140	Chr4	2592230	2593169	-
AT4TE12145	Chr4	2592342	2592746	+
AT4TE12330	Chr4	2636209	2636419	+
AT4TE12440	Chr4	2663475	2663732	+
AT4TE12455	Chr4	2667278	2667495	-
TEM4940	Chr4	2669976	2670301	+
TEM4943	Chr4	2686003	2686708	+
AT4TE12580	Chr4	2690338	2690684	+
TEM4945	Chr4	2692360	2692912	+
AT4TE12695	Chr4	2723307	2724404	-
AT4TE12865	Chr4	2755347	2756052	+
AT4TE12900	Chr4	2762594	2763094	+
AT4TE13110	Chr4	2796447	2800705	-
AT4TE13120	Chr4	2799274	2800320	+
AT4TE13895	Chr4	2986742	2988323	+
AT4TE13910	Chr4	2989326	2989833	+
AT4TE15300	Chr4	3354752	3355112	-
AT4TE16305	Chr4	3662528	3663180	+
AT4TE17035	Chr4	3896726	3897856	+
AT4TE17710	Chr4	4087090	4088276	+
AT4TE19520	Chr4	4643048	4643704	+
AT4TE19630	Chr4	4664189	4664822	+
AT4TE20020	Chr4	4801125	4801844	-
AT4TE20025	Chr4	4801848	4802152	-
AT4TE20275	Chr4	4870635	4871188	-
[truncated: 1,040 more rows]

## Sheet: both
TE_ID	chromosome	start	end	direction
AT1TE05700	Chr1	1738943	1739205	+
TEM0068	Chr1	2526792	2527035	+
AT1TE12425	Chr1	3825411	3825780	-
TEM0210	Chr1	7312845	7313583	+
TEM0265	Chr1	8335989	8336257	+
TEM0304	Chr1	8837359	8838644	+
AT1TE33745	Chr1	10442999	10443478	+
AT1TE43985	Chr1	13449263	13450021	-
AT1TE44915	Chr1	13714228	13714597	-
AT1TE45885	Chr1	13979217	13979451	-
TEM1226	Chr1	20106645	20106858	+
AT1TE70640	Chr1	21398751	21399739	-
AT1TE80585	Chr1	24533095	24533501	+
AT1TE93275	Chr1	28515061	28516118	+
AT1G75945	Chr1	28515245	28515916	-
AT1TE98925	Chr1	30255513	30255811	-
AT2G01310	Chr2	152298	152827	-
AT2TE01015	Chr2	252200	252652	+
TEM1886	Chr2	616086	616839	+
AT2TE12130	Chr2	2744726	2745201	-
AT2TE13165	Chr2	3023981	3024329	-
TEM2233	Chr2	4225379	4225738	+
AT2TE18750	Chr2	4473672	4473966	-
AT2TE19750	Chr2	4758824	4759615	-
AT2TE22155	Chr2	5467917	5468179	+
AT2TE25035	Chr2	6162958	6163580	+
AT2TE28320	Chr2	6953365	6953712	+
AT2TE44895	Chr2	10465780	10466226	+
AT2TE47895	Chr2	11101221	11102213	+
AT2TE52000	Chr2	11948631	11948942	-
AT2G39160	Chr2	16333490	16334173	-
AT3TE37695	Chr3	9018803	9019176	+
AT3TE38460	Chr3	9205268	9205976	-
AT3TE42540	Chr3	10237854	10238369	-
AT3TE44700	Chr3	10752504	10752982	-
AT3TE47345	Chr3	11366606	11367365	+
AT3TE50225	Chr3	12061704	12061935	+
AT3TE59850	Chr3	14615137	14615815	+
AT3TE63280	Chr3	15650341	15650778	-
AT3TE68510	Chr3	16905739	16905944	-
AT3TE71455	Chr3	17642261	17642735	-
AT3TE82710	Chr3	20349858	20350363	-
AT4TE05110	Chr4	1002008	1002295	-
AT4TE08355	Chr4	1644066	1645245	-
AT4TE09470	Chr4	1974081	1974621	-
AT4TE12380	Chr4	2653972	2654319	+
AT4TE20425	Chr4	4904712	4906162	+
AT4TE20865	Chr4	4996187	4996443	+
AT4TE21470	Chr4	5168071	5168435	+
AT4TE21790	Chr4	5233462	5233974	-
AT4TE35795	Chr4	8109192	8109907	-
AT4TE41205	Chr4	9174232	9174648	-
AT4TE50675	Chr4	11045870	11046232	+
AT4G20520	Chr4	11045912	11047858	+
AT4TE50680	Chr4	11046232	11046689	+
TEM5733	Chr4	14245644	14246053	+
AT5TE12950	Chr5	3566114	3566344	+
AT5TE18410	Chr5	5098687	5098920	-
AT5TE28070	Chr5	7757369	7758011	+
AT5TE28350	Chr5	7833533	7833867	+
AT5G26840	Chr5	9442288	9442605	-
AT5TE39400	Chr5	10839922	10840528	-
AT5TE39405	Chr5	10839932	10840506	+
AT5TE48830	Chr5	13720508	13721548	+
AT5TE50150	Chr5	14060082	14060339	-
TEM6853	Chr5	15830199	15830845	+
TEM6899	Chr5	16240163	16240673	+
AT5TE59290	Chr5	16416972	16417225	+
AT5TE59295	Chr5	16417225	16417589	+
AT5TE61925	Chr5	17145769	17146071	+
AT5TE64260	Chr5	17795704	17796054	-
AT5TE65340	Chr5	18132765	18133138	-
AT5TE68925	Chr5	19153813	19155394	+
AT5TE72465	Chr5	20119735	20119989	-
AT5TE72990	Chr5	20266283	20266957	-
TEM7298	Chr5	21373465	21375089	+
AT5TE78050	Chr5	21668186	21668894	+
AT5TE87355	Chr5	24285167	24285637	-
AT5TE93870	Chr5	26071234	26071830	+
TEM7481	Chr5	26974235	26974589	+
