# Supplementary figures and images for: Histone H1 prevents non-CG methylation-mediated small RNA biogenesis in Arabidopsis heterochromatin
Source: eLife journal article supplement (doi:10.7554/elife.72676), 2021-12-01

Figure 4-figure supplement 2

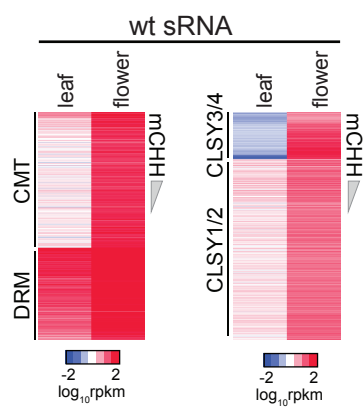

Supplement: supp [file elife-72676-supp-v1.zip]

Figure 5-figure supplement 1

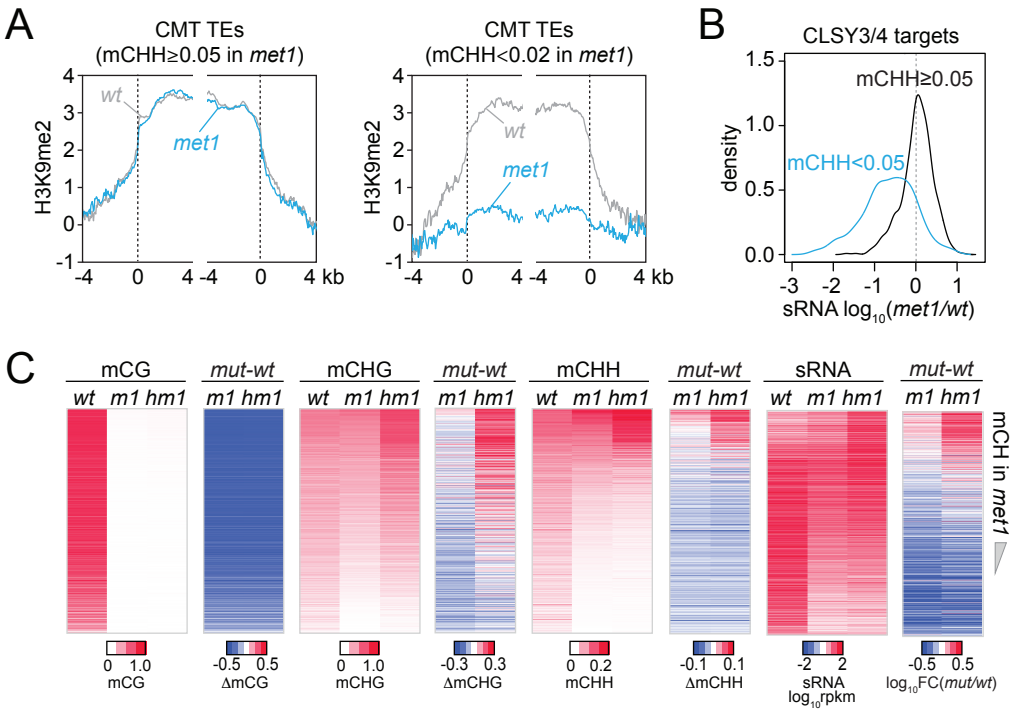

Supplement: supp [file elife-72676-supp-v1.zip]

Figure 8-figure supplement 1

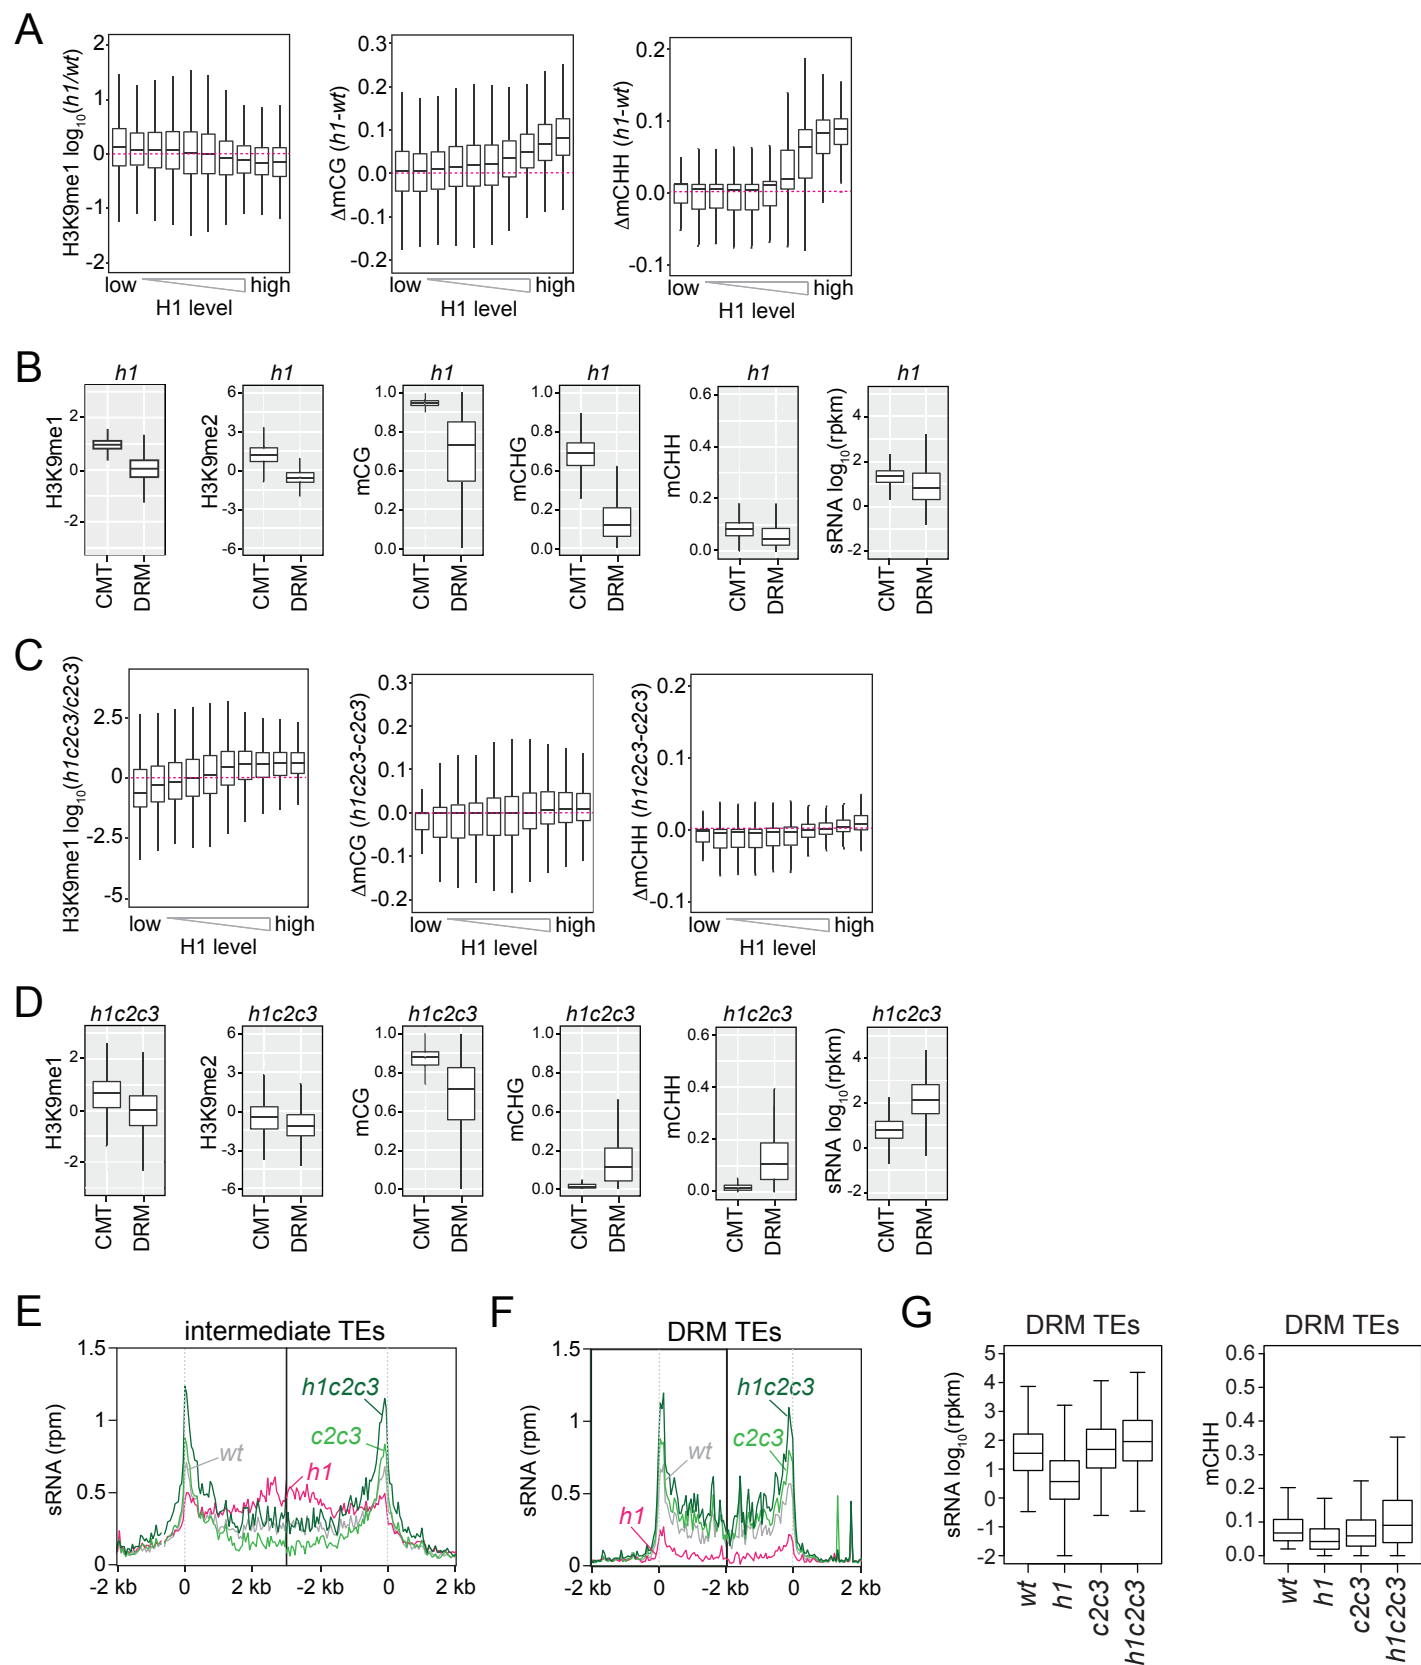

Supplement: supp [file elife-72676-supp-v1.zip]

Figure 2-figure supplement 1

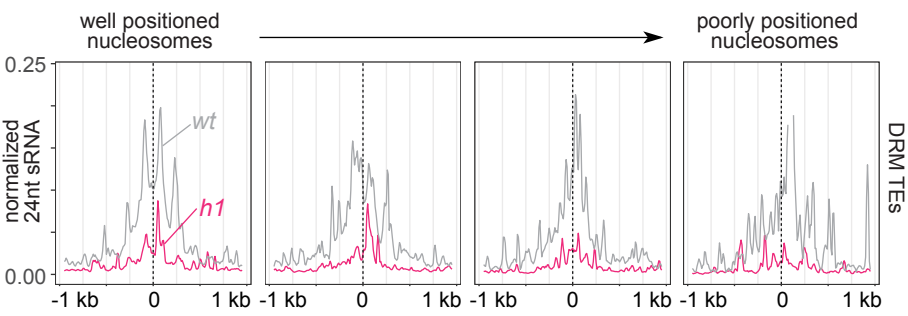

Supplement: supp [file elife-72676-supp-v1.zip]

Figure 4-figure supplement 1

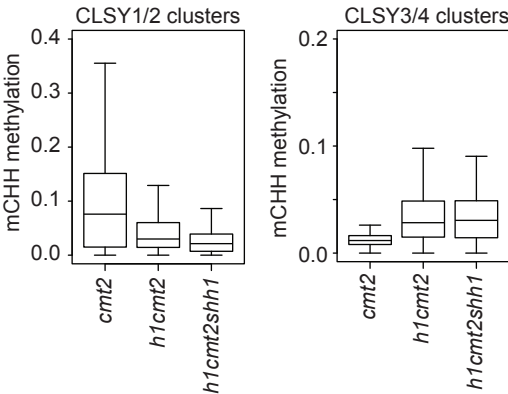

Supplement: supp [file elife-72676-supp-v1.zip]

Figure 7-figure supplement 1

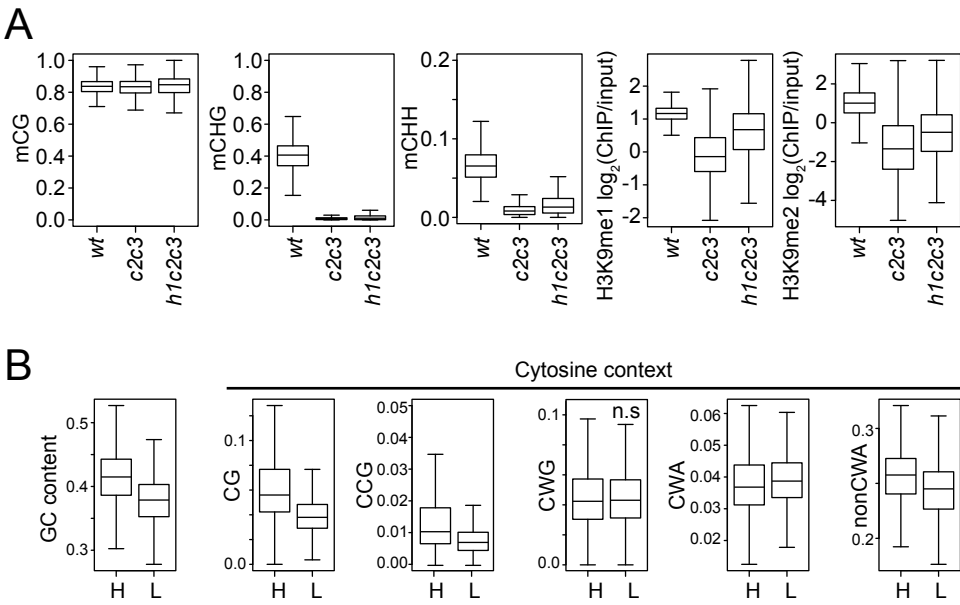

Supplement: supp [file elife-72676-supp-v1.zip]

Figure 1-figure supplement 1

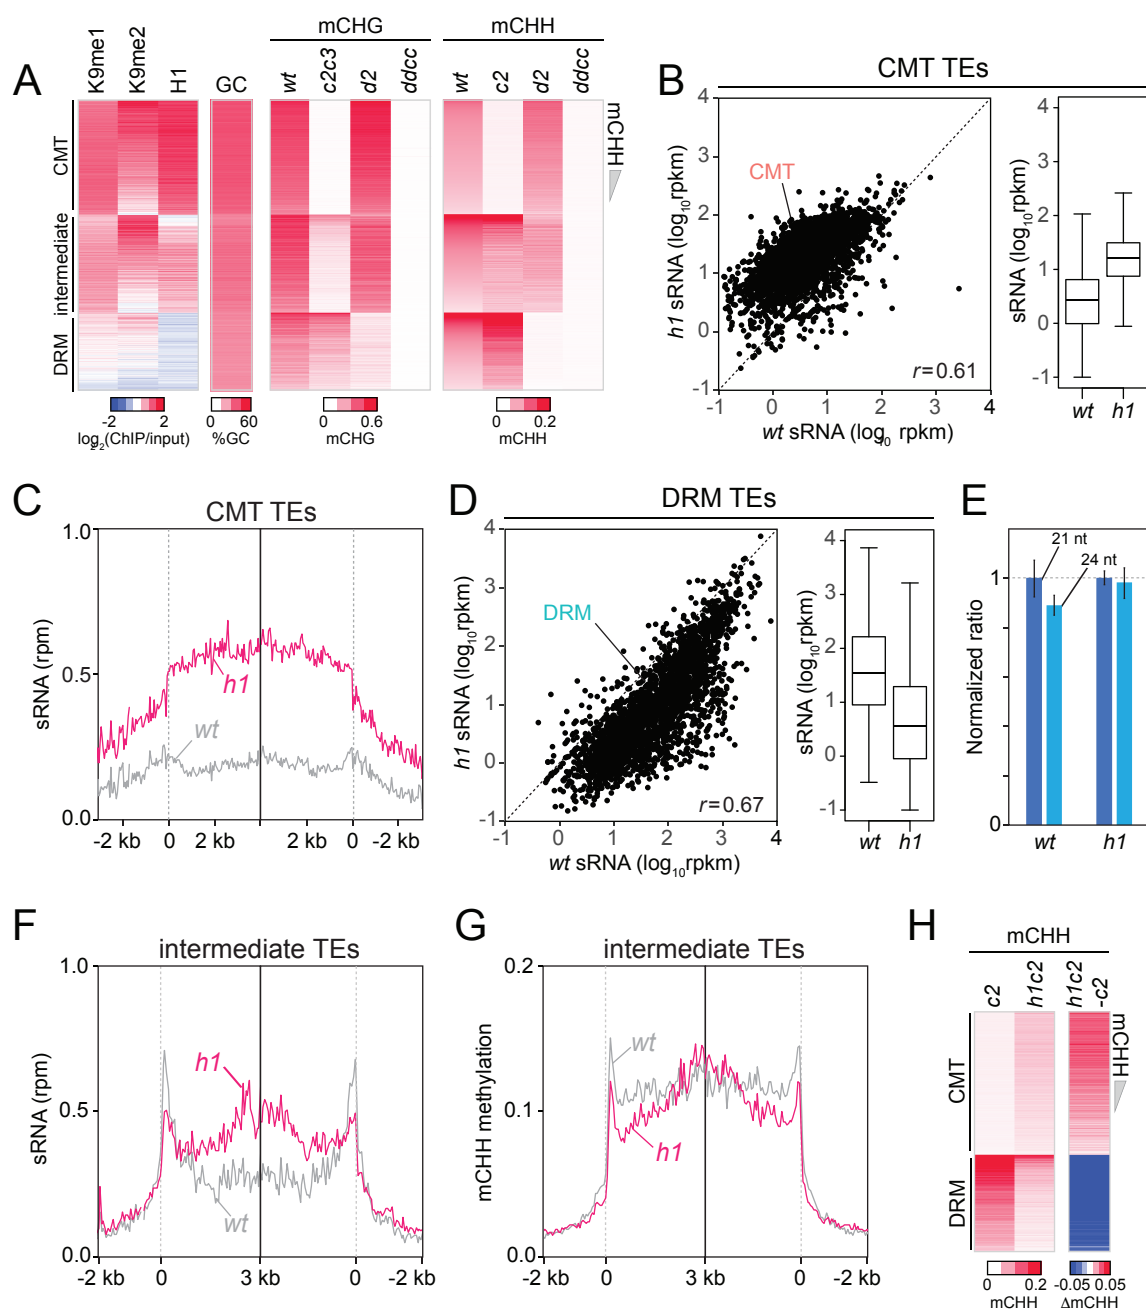

Supplement: supp [file elife-72676-supp-v1.zip]

Figure 6-figure supplement 1

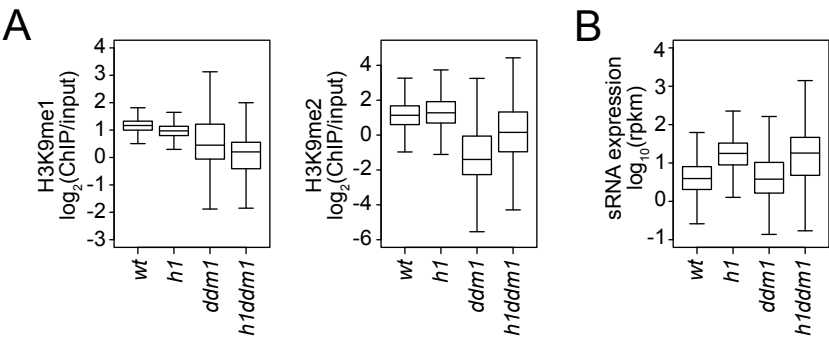

Supplement: supp [file elife-72676-supp-v1.zip]
